# Supplementary material for: Genome concentration limits cell growth and modulates proteome composition in Escherichia coli
Source: bioRxiv preprint, doi:10.1101/2024.02.26.582181, version 2 (2024-08-30)
Supplement: Dataset 1 [file 582181_file05.xlsx]

## Sheet: Index
Main Tab
Column Name	Description
Entry name	Uniprot entry name
Uniprot	Uniprot ID
Protein names	Full protein name
Gene name (primary )	Gene name
UniqID_Exp1	Number of independent peptide measurements from Exp #1
UniqID_Exp2	Number of independent peptide measurements from Exp #2
Mean Protein Slope (multi-N)	mean protein slope value (Exp 1 and 2) for multi-N timecourse (see Fig 3 Fig supplement 4)
Mean Protein Slope (1-N)	mean protein slope value (Exp 1 and 2) for 1-N timecourse (see Fig 3 Fig supplement 4)
Gene ontology (biological process)	gene ontological information (source: Uniprot)
Gene ontology (cellular component)	gene ontological information (source: Uniprot)
Gene ontology (GO)	gene ontological information (source: Uniprot)
Gene ontology (molecular function)	gene ontological information (source: Uniprot)
Subcellular location [CC]	gene ontological information (source: Uniprot)
Experiment Tabs
Column Name	Description
Entry name	Uniprot entry name
Uniprot	Uniprot ID
Protein names	Full protein name
Gene name (primary )	Gene name
UniqID_Exp1	Number of independent peptide measurements from Exp #1
Protien Slope (multi-N)	Protein slope value for multi-N timecourse (see Fig 3 Fig supplement 4)
Protien Slope (1-N)	Protein slope value for 1-N timecourse (see Fig 3 Fig supplement 4)
Normalized_proportion_1	Relative protein concentration in multi-N arrest timecourse: Timepoint 1
Normalized_proportion_2	Relative protein concentration in multi-N arrest timecourse: Timepoint 2
Normalized_proportion_3	Relative protein concentration in multi-N arrest timecourse: Timepoint 3
Normalized_proportion_4	Relative protein concentration in 1-N arrest timecourse: Timepoint 1
Normalized_proportion_5	Relative protein concentration in 1-N arrest timecourse: Timepoint 2
Normalized_proportion_6	Relative protein concentration in 1-N arrest timecourse: Timepoint 3
Normalized_proportion_7	Relative protein concentration in 1-N arrest timecourse: Timepoint 4
Normalized_proportion_8	Relative protein concentration in 1-N arrest timecourse: Timepoint 5
GO analysis
Column Name	Description
Type	Annotation type
Name	Annotation name
Size	Number of measured proteins in annotation group
Score	Enrichment score. Reflects the rank-ordered Slope values of all proteins within an annotation group -
P value	Statistical significance
Benj. Hoch. FDR	Benjamini-Hochberg False discovery Rate
For more information on the GO analysis - Cox, J., Mann, M. 1D and 2D annotation enrichment: a statistical method integrating quantitative proteomics with complementary high-throughput data. BMC Bioinformatics 13 (Suppl 16), S12 (2012). https://doi.org/10.1186/1471-2105-13-S16-S12

## Sheet: Main
Entry name	Uniprot	Protein names	Gene name (primary )	UniqID_Exp1	UniqID_Exp2	Mean Protein Slope (multi-N)	Mean Protein Slope (1-N)	Gene ontology (biological process)	Gene ontology (cellular component)	Gene ontology (GO)	Gene ontology (molecular function)	Subcellular location [CC]
3MG1_ECOLI	P05100	DNA-3-methyladenine glycosylase 1 (EC 3.2.2.20) (3-methyladenine-DNA glycosylase I, constitutive) (TAG I) (DNA-3-methyladenine glycosidase I) (DNA-3-methyladenine glycosylase I)	tag	2	1	0.011714	-0.608091	base-excision repair [GO:0006284]; DNA dealkylation involved in DNA repair [GO:0006307]		DNA-3-methyladenine glycosylase activity [GO:0008725]; metal ion binding [GO:0046872]; base-excision repair [GO:0006284]; DNA dealkylation involved in DNA repair [GO:0006307]	DNA-3-methyladenine glycosylase activity [GO:0008725]; metal ion binding [GO:0046872]
3MG2_ECOLI	P04395	DNA-3-methyladenine glycosylase 2 (EC 3.2.2.21) (3-methyladenine-DNA glycosylase II, inducible) (TAG II) (DNA-3-methyladenine glycosidase II) (DNA-3-methyladenine glycosylase II)	alkA	3	3	-0.0489943	-0.0983961	base-excision repair [GO:0006284]; base-excision repair, AP site formation [GO:0006285]; cellular response to DNA damage stimulus [GO:0006974]; DNA dealkylation involved in DNA repair [GO:0006307]; DNA repair [GO:0006281]	cytoplasm [GO:0005737]; protein-DNA complex [GO:0032993]	cytoplasm [GO:0005737]; protein-DNA complex [GO:0032993]; alkylated DNA binding [GO:0032131]; alkylbase DNA N-glycosylase activity [GO:0003905]; DNA-3-methyladenine glycosylase activity [GO:0008725]; DNA-3-methylguanine glycosylase activity [GO:0052822]; DNA-7-methyladenine glycosylase activity [GO:0052821]; DNA-7-methylguanine glycosylase activity [GO:0043916]; base-excision repair [GO:0006284];…	alkylated DNA binding [GO:0032131]; alkylbase DNA N-glycosylase activity [GO:0003905]; DNA-3-methyladenine glycosylase activity [GO:0008725]; DNA-3-methylguanine glycosylase activity [GO:0052822]; DNA-7-methyladenine glycosylase activity [GO:0052821]; DNA-7-methylguanine glycosylase activity [GO:0043916]
3PASE_ECOLI	P30871	Inorganic triphosphatase (PPPase) (EC 3.6.1.25) (ORFXE)	ygiF	28	33	-0.0579476	0.0833509			metal ion binding [GO:0046872]; triphosphatase activity [GO:0050355]	metal ion binding [GO:0046872]; triphosphatase activity [GO:0050355]
5DNU_ECOLI	P76491	5'-deoxynucleotidase YfbR (EC 3.1.3.89) (5'-deoxyribonucleotidase) (Nucleoside 5'-monophosphate phosphohydrolase)	yfbR	16	12	0.0325005	0.208776	dUMP biosynthetic process [GO:0006226]; pyrimidine deoxyribonucleotide salvage [GO:0010139]	cytoplasm [GO:0005737]	cytoplasm [GO:0005737]; 5'-deoxynucleotidase activity [GO:0002953]; cobalt ion binding [GO:0050897]; identical protein binding [GO:0042802]; nucleotide binding [GO:0000166]; dUMP biosynthetic process [GO:0006226]; pyrimidine deoxyribonucleotide salvage [GO:0010139]	5'-deoxynucleotidase activity [GO:0002953]; cobalt ion binding [GO:0050897]; identical protein binding [GO:0042802]; nucleotide binding [GO:0000166]	SUBCELLULAR LOCATION: Cytoplasm {ECO:0000255|HAMAP-Rule:MF_01100}.
5FCL_ECOLI	P0AC28	5-formyltetrahydrofolate cyclo-ligase (5-FCL) (EC 6.3.3.2) (5,10-methenyltetrahydrofolate synthetase) (MTHFS)	ygfA	2	1	-0.0147851	-0.194356	dormancy process [GO:0022611]; folic acid-containing compound biosynthetic process [GO:0009396]; tetrahydrofolate interconversion [GO:0035999]		5-formyltetrahydrofolate cyclo-ligase activity [GO:0030272]; ATP binding [GO:0005524]; dormancy process [GO:0022611]; folic acid-containing compound biosynthetic process [GO:0009396]; tetrahydrofolate interconversion [GO:0035999]	5-formyltetrahydrofolate cyclo-ligase activity [GO:0030272]; ATP binding [GO:0005524]
6PGD_ECOLI	P00350	6-phosphogluconate dehydrogenase, decarboxylating (EC 1.1.1.44)	gnd	248	212	-0.0155334	0.737928	D-gluconate catabolic process [GO:0046177]; pentose-phosphate shunt [GO:0006098]; pentose-phosphate shunt, oxidative branch [GO:0009051]	cytosol [GO:0005829]	cytosol [GO:0005829]; identical protein binding [GO:0042802]; NADP binding [GO:0050661]; phosphogluconate dehydrogenase (decarboxylating) activity [GO:0004616]; protein homodimerization activity [GO:0042803]; D-gluconate catabolic process [GO:0046177]; pentose-phosphate shunt [GO:0006098]; pentose-phosphate shunt, oxidative branch [GO:0009051]	identical protein binding [GO:0042802]; NADP binding [GO:0050661]; phosphogluconate dehydrogenase (decarboxylating) activity [GO:0004616]; protein homodimerization activity [GO:0042803]
6PGL_ECOLI	P52697	6-phosphogluconolactonase (6-P-gluconolactonase) (Pgl) (EC 3.1.1.31)	pgl	57	50	-0.0946132	0.159046	glucose metabolic process [GO:0006006]; pentose-phosphate shunt [GO:0006098]	cytosol [GO:0005829]	cytosol [GO:0005829]; 6-phosphogluconolactonase activity [GO:0017057]; glucose metabolic process [GO:0006006]; pentose-phosphate shunt [GO:0006098]	6-phosphogluconolactonase activity [GO:0017057]
A2MG_ECOLI	P76578	Alpha-2-macroglobulin (ECAM)	yfhM	46	63	-0.0626194	-0.794999	negative regulation of endopeptidase activity [GO:0010951]	anchored component of external side of plasma membrane [GO:0031362]; extracellular space [GO:0005615]	anchored component of external side of plasma membrane [GO:0031362]; extracellular space [GO:0005615]; endopeptidase inhibitor activity [GO:0004866]; negative regulation of endopeptidase activity [GO:0010951]	endopeptidase inhibitor activity [GO:0004866]	SUBCELLULAR LOCATION: Cell inner membrane {ECO:0000269|PubMed:18697741, ECO:0000269|PubMed:21210718}; Lipid-anchor {ECO:0000255|PROSITE-ProRule:PRU00303}; Periplasmic side {ECO:0000269|PubMed:18697741}.
AAER_ECOLI	P67662	HTH-type transcriptional activator AaeR	aaeR	1	2	-0.15995	-0.266629	DNA-templated transcription, initiation [GO:0006352]; positive regulation of transcription, DNA-templated [GO:0045893]; regulation of transcription, DNA-templated [GO:0006355]; transcription, DNA-templated [GO:0006351]		DNA-binding transcription factor activity [GO:0003700]; transcription cis-regulatory region binding [GO:0000976]; DNA-templated transcription, initiation [GO:0006352]; positive regulation of transcription, DNA-templated [GO:0045893]; regulation of transcription, DNA-templated [GO:0006355]; transcription, DNA-templated [GO:0006351]	DNA-binding transcription factor activity [GO:0003700]; transcription cis-regulatory region binding [GO:0000976]
AAS_ECOLI	P31119	Bifunctional protein Aas [Includes: 2-acylglycerophosphoethanolamine acyltransferase (EC 2.3.1.40) (2-acyl-GPE acyltransferase) (Acyl-[acyl-carrier-protein]--phospholipid O-acyltransferase); Acyl-[acyl-carrier-protein] synthetase (EC 6.2.1.20) (Acyl-ACP synthetase) (Long-chain-fatty-acid--[acyl-carrier-protein] ligase)]	aas	11	10	0.0593527	-0.497319	fatty acid metabolic process [GO:0006631]; phospholipid biosynthetic process [GO:0008654]	integral component of membrane [GO:0016021]; membrane [GO:0016020]; plasma membrane [GO:0005886]	integral component of membrane [GO:0016021]; membrane [GO:0016020]; plasma membrane [GO:0005886]; acyl-[acyl-carrier-protein]-phospholipid O-acyltransferase activity [GO:0008779]; ATP binding [GO:0005524]; long-chain fatty acid [acyl-carrier-protein] ligase activity [GO:0008922]; long-chain fatty acid-CoA ligase activity [GO:0004467]; fatty acid metabolic process [GO:0006631]; phospholipid biosyn…	acyl-[acyl-carrier-protein]-phospholipid O-acyltransferase activity [GO:0008779]; ATP binding [GO:0005524]; long-chain fatty acid [acyl-carrier-protein] ligase activity [GO:0008922]; long-chain fatty acid-CoA ligase activity [GO:0004467]	SUBCELLULAR LOCATION: Cell inner membrane; Multi-pass membrane protein.
AAT_ECOLI	P00509	Aspartate aminotransferase (AspAT) (EC 2.6.1.1) (Transaminase A)	aspC	208	171	-0.0505146	0.0270154	L-phenylalanine biosynthetic process [GO:0009094]; L-phenylalanine biosynthetic process from chorismate via phenylpyruvate [GO:0033585]	cytoplasm [GO:0005737]; cytosol [GO:0005829]	cytoplasm [GO:0005737]; cytosol [GO:0005829]; identical protein binding [GO:0042802]; L-aspartate:2-oxoglutarate aminotransferase activity [GO:0004069]; L-tyrosine:2-oxoglutarate aminotransferase activity [GO:0004838]; pyridoxal phosphate binding [GO:0030170]; transaminase activity [GO:0008483]; L-phenylalanine biosynthetic process [GO:0009094]; L-phenylalanine biosynthetic process from chorismat…	identical protein binding [GO:0042802]; L-aspartate:2-oxoglutarate aminotransferase activity [GO:0004069]; L-tyrosine:2-oxoglutarate aminotransferase activity [GO:0004838]; pyridoxal phosphate binding [GO:0030170]; transaminase activity [GO:0008483]	SUBCELLULAR LOCATION: Cytoplasm.
ABDH_ECOLI	P77674	Gamma-aminobutyraldehyde dehydrogenase (ABALDH) (EC 1.2.1.19) (1-pyrroline dehydrogenase) (4-aminobutanal dehydrogenase) (5-aminopentanal dehydrogenase) (EC 1.2.1.-)	patD	17	18	-0.0633747	-0.62515	L-lysine catabolic process [GO:0019477]; protein homotetramerization [GO:0051289]; putrescine catabolic process [GO:0009447]	cytosol [GO:0005829]	cytosol [GO:0005829]; 1-pyrroline dehydrogenase activity [GO:0033737]; aldehyde dehydrogenase (NAD+) activity [GO:0004029]; aminobutyraldehyde dehydrogenase activity [GO:0019145]; identical protein binding [GO:0042802]; NAD binding [GO:0051287]; L-lysine catabolic process [GO:0019477]; protein homotetramerization [GO:0051289]; putrescine catabolic process [GO:0009447]	1-pyrroline dehydrogenase activity [GO:0033737]; aldehyde dehydrogenase (NAD+) activity [GO:0004029]; aminobutyraldehyde dehydrogenase activity [GO:0019145]; identical protein binding [GO:0042802]; NAD binding [GO:0051287]
AC4CH_ECOLI	P67603	N(4)-acetylcytidine amidohydrolase (ac4C amidohydrolase) (EC 3.5.1.135)	yqfB	12	15	-0.0132115	-0.0712968		cytosol [GO:0005829]	cytosol [GO:0005829]; hydrolase activity, acting on carbon-nitrogen (but not peptide) bonds, in linear amidines [GO:0016813]; N4-acetylcytidine amidohydrolase activity [GO:0106251]	hydrolase activity, acting on carbon-nitrogen (but not peptide) bonds, in linear amidines [GO:0016813]; N4-acetylcytidine amidohydrolase activity [GO:0106251]
ACCA_ECOLI	P0ABD5	Acetyl-coenzyme A carboxylase carboxyl transferase subunit alpha (ACCase subunit alpha) (Acetyl-CoA carboxylase carboxyltransferase subunit alpha) (EC 2.1.3.15)	accA	143	120	0.0427382	0.465717	fatty acid biosynthetic process [GO:0006633]; long-chain fatty acid biosynthetic process [GO:0042759]; malonyl-CoA biosynthetic process [GO:2001295]	acetate CoA-transferase complex [GO:0009329]; cytoplasm [GO:0005737]; cytosol [GO:0005829]	acetate CoA-transferase complex [GO:0009329]; cytoplasm [GO:0005737]; cytosol [GO:0005829]; acetyl-CoA carboxylase activity [GO:0003989]; ATP binding [GO:0005524]; carboxyl- or carbamoyltransferase activity [GO:0016743]; identical protein binding [GO:0042802]; fatty acid biosynthetic process [GO:0006633]; long-chain fatty acid biosynthetic process [GO:0042759]; malonyl-CoA biosynthetic process [G…	acetyl-CoA carboxylase activity [GO:0003989]; ATP binding [GO:0005524]; carboxyl- or carbamoyltransferase activity [GO:0016743]; identical protein binding [GO:0042802]	SUBCELLULAR LOCATION: Cytoplasm.
ACCC_ECOLI	P24182	Biotin carboxylase (EC 6.3.4.14) (Acetyl-CoA carboxylase subunit A) (ACC) (EC 6.4.1.2)	accC	123	105	-0.0942654	-0.16944	fatty acid biosynthetic process [GO:0006633]; malonyl-CoA biosynthetic process [GO:2001295]; negative regulation of fatty acid biosynthetic process [GO:0045717]	cytoplasm [GO:0005737]; cytosol [GO:0005829]	cytoplasm [GO:0005737]; cytosol [GO:0005829]; acetyl-CoA carboxylase activity [GO:0003989]; ATP binding [GO:0005524]; biotin carboxylase activity [GO:0004075]; metal ion binding [GO:0046872]; fatty acid biosynthetic process [GO:0006633]; malonyl-CoA biosynthetic process [GO:2001295]; negative regulation of fatty acid biosynthetic process [GO:0045717]	acetyl-CoA carboxylase activity [GO:0003989]; ATP binding [GO:0005524]; biotin carboxylase activity [GO:0004075]; metal ion binding [GO:0046872]
ACCD_ECOLI	P0A9Q5	Acetyl-coenzyme A carboxylase carboxyl transferase subunit beta (ACCase subunit beta) (Acetyl-CoA carboxylase carboxyltransferase subunit beta) (EC 2.1.3.15)	accD	108	80	-0.0218541	0.344982	fatty acid biosynthetic process [GO:0006633]; long-chain fatty acid biosynthetic process [GO:0042759]; malonyl-CoA biosynthetic process [GO:2001295]; negative regulation of translation [GO:0017148]	acetate CoA-transferase complex [GO:0009329]; cytosol [GO:0005829]	acetate CoA-transferase complex [GO:0009329]; cytosol [GO:0005829]; acetyl-CoA carboxylase activity [GO:0003989]; ATP binding [GO:0005524]; carboxyl- or carbamoyltransferase activity [GO:0016743]; DNA binding [GO:0003677]; mRNA binding [GO:0003729]; zinc ion binding [GO:0008270]; fatty acid biosynthetic process [GO:0006633]; long-chain fatty acid biosynthetic process [GO:0042759]; malonyl-CoA bio…	acetyl-CoA carboxylase activity [GO:0003989]; ATP binding [GO:0005524]; carboxyl- or carbamoyltransferase activity [GO:0016743]; DNA binding [GO:0003677]; mRNA binding [GO:0003729]; zinc ion binding [GO:0008270]	SUBCELLULAR LOCATION: Cytoplasm.
ACEA_ECOLI	P0A9G6	Isocitrate lyase (ICL) (EC 4.1.3.1) (Isocitrase) (Isocitratase)	aceA	218	187	-0.12909	-0.500119	glyoxylate cycle [GO:0006097]; tricarboxylic acid cycle [GO:0006099]	cytosol [GO:0005829]	cytosol [GO:0005829]; cation binding [GO:0043169]; isocitrate lyase activity [GO:0004451]; metal ion binding [GO:0046872]; glyoxylate cycle [GO:0006097]; tricarboxylic acid cycle [GO:0006099]	cation binding [GO:0043169]; isocitrate lyase activity [GO:0004451]; metal ion binding [GO:0046872]
ACEK_ECOLI	P11071	Isocitrate dehydrogenase kinase/phosphatase (IDH kinase/phosphatase) (IDHK/P) (EC 2.7.11.5) (EC 3.1.3.-)	aceK	4	2	-0.0371307	-0.492073	glucose metabolic process [GO:0006006]; glyoxylate cycle [GO:0006097]; peptidyl-serine dephosphorylation [GO:0070262]; peptidyl-serine phosphorylation [GO:0018105]; protein dephosphorylation [GO:0006470]; regulation of catalytic activity [GO:0050790]; tricarboxylic acid cycle [GO:0006099]	cytoplasm [GO:0005737]	cytoplasm [GO:0005737]; [isocitrate dehydrogenase (NADP+)] kinase activity [GO:0008772]; AMP binding [GO:0016208]; ATP binding [GO:0005524]; phosphoprotein phosphatase activity [GO:0004721]; protein serine/threonine kinase activity [GO:0004674]; protein serine/threonine phosphatase activity [GO:0004722]; glucose metabolic process [GO:0006006]; glyoxylate cycle [GO:0006097]; peptidyl-serine dephos…	[isocitrate dehydrogenase (NADP+)] kinase activity [GO:0008772]; AMP binding [GO:0016208]; ATP binding [GO:0005524]; phosphoprotein phosphatase activity [GO:0004721]; protein serine/threonine kinase activity [GO:0004674]; protein serine/threonine phosphatase activity [GO:0004722]	SUBCELLULAR LOCATION: Cytoplasm.
ACFD_ECOLI	P0CK95	Putative lipoprotein AcfD homolog	yghJ	12	18	0.00935994	-0.503109		plasma membrane [GO:0005886]	plasma membrane [GO:0005886]		SUBCELLULAR LOCATION: Cell inner membrane {ECO:0000255|PROSITE-ProRule:PRU00303}; Lipid-anchor {ECO:0000255|PROSITE-ProRule:PRU00303}.
ACKA_ECOLI	P0A6A3	Acetate kinase (EC 2.7.2.1) (Acetokinase)	ackA	78	65	-0.0133542	0.26118	acetate biosynthetic process [GO:0019413]; acetate metabolic process [GO:0006083]; acetyl-CoA biosynthetic process [GO:0006085]; propionate biosynthetic process [GO:0019542]; single-species biofilm formation on inanimate substrate [GO:0044011]	cytosol [GO:0005829]; membrane [GO:0016020]	cytosol [GO:0005829]; membrane [GO:0016020]; acetate kinase activity [GO:0008776]; ATP binding [GO:0005524]; magnesium ion binding [GO:0000287]; zinc ion binding [GO:0008270]; acetate biosynthetic process [GO:0019413]; acetate metabolic process [GO:0006083]; acetyl-CoA biosynthetic process [GO:0006085]; propionate biosynthetic process [GO:0019542]; single-species biofilm formation on inanimate su…	acetate kinase activity [GO:0008776]; ATP binding [GO:0005524]; magnesium ion binding [GO:0000287]; zinc ion binding [GO:0008270]	SUBCELLULAR LOCATION: Cytoplasm.
ACNA_ECOLI	P25516	Aconitate hydratase A (ACN) (Aconitase) (EC 4.2.1.3) (Iron-responsive protein-like) (IRP-like) (RNA-binding protein) (Stationary phase enzyme)	acnA	150	126	-0.0679258	0.137369	anaerobic respiration [GO:0009061]; citrate metabolic process [GO:0006101]; glyoxylate cycle [GO:0006097]; response to oxidative stress [GO:0006979]; tricarboxylic acid cycle [GO:0006099]	cytoplasm [GO:0005737]; cytosol [GO:0005829]	cytoplasm [GO:0005737]; cytosol [GO:0005829]; 4 iron, 4 sulfur cluster binding [GO:0051539]; aconitate hydratase activity [GO:0003994]; citrate dehydratase activity [GO:0047780]; iron ion binding [GO:0005506]; metal ion binding [GO:0046872]; mRNA 3'-UTR binding [GO:0003730]; mRNA binding [GO:0003729]; anaerobic respiration [GO:0009061]; citrate metabolic process [GO:0006101]; glyoxylate cycle [GO…	4 iron, 4 sulfur cluster binding [GO:0051539]; aconitate hydratase activity [GO:0003994]; citrate dehydratase activity [GO:0047780]; iron ion binding [GO:0005506]; metal ion binding [GO:0046872]; mRNA 3'-UTR binding [GO:0003730]; mRNA binding [GO:0003729]
ACNB_ECOLI	P36683	Aconitate hydratase B (ACN) (Aconitase) (EC 4.2.1.3) ((2R,3S)-2-methylisocitrate dehydratase) ((2S,3R)-3-hydroxybutane-1,2,3-tricarboxylate dehydratase) (2-methyl-cis-aconitate hydratase) (EC 4.2.1.99) (Iron-responsive protein-like) (IRP-like) (RNA-binding protein)	acnB	431	361	0.0412441	-0.155802	glyoxylate cycle [GO:0006097]; propionate catabolic process, 2-methylcitrate cycle [GO:0019629]; regulation of translation [GO:0006417]; tricarboxylic acid cycle [GO:0006099]	cytosol [GO:0005829]	cytosol [GO:0005829]; 2-methylisocitrate dehydratase activity [GO:0047456]; 4 iron, 4 sulfur cluster binding [GO:0051539]; aconitate hydratase activity [GO:0003994]; citrate dehydratase activity [GO:0047780]; metal ion binding [GO:0046872]; mRNA 3'-UTR binding [GO:0003730]; mRNA binding [GO:0003729]; glyoxylate cycle [GO:0006097]; propionate catabolic process, 2-methylcitrate cycle [GO:0019629]; …	2-methylisocitrate dehydratase activity [GO:0047456]; 4 iron, 4 sulfur cluster binding [GO:0051539]; aconitate hydratase activity [GO:0003994]; citrate dehydratase activity [GO:0047780]; metal ion binding [GO:0046872]; mRNA 3'-UTR binding [GO:0003730]; mRNA binding [GO:0003729]
ACPH_ECOLI	P21515	Acyl carrier protein phosphodiesterase (ACP phosphodiesterase) (EC 3.1.4.14)	acpH	2	5	-0.0304637	0.144523	fatty acid biosynthetic process [GO:0006633]		[acyl-carrier-protein] phosphodiesterase activity [GO:0008770]; fatty acid biosynthetic process [GO:0006633]	[acyl-carrier-protein] phosphodiesterase activity [GO:0008770]
ACPT_ECOLI	P37623	4'-phosphopantetheinyl transferase AcpT (EC 2.7.8.7)	acpT	1	2	0.00573676	-0.148714	fatty acid biosynthetic process [GO:0006633]; lysine biosynthetic process via aminoadipic acid [GO:0019878]; peptidyl-serine phosphopantetheinylation [GO:0018070]	cytosol [GO:0005829]	cytosol [GO:0005829]; holo-[acyl-carrier-protein] synthase activity [GO:0008897]; magnesium ion binding [GO:0000287]; fatty acid biosynthetic process [GO:0006633]; lysine biosynthetic process via aminoadipic acid [GO:0019878]; peptidyl-serine phosphopantetheinylation [GO:0018070]	holo-[acyl-carrier-protein] synthase activity [GO:0008897]; magnesium ion binding [GO:0000287]
ACP_ECOLI	P0A6A8	Acyl carrier protein (ACP) (Cytosolic-activating factor) (CAF) (Fatty acid synthase acyl carrier protein)	acpP	31	25	0.00547611	0.721312	fatty acid biosynthetic process [GO:0006633]; lipid A biosynthetic process [GO:0009245]; lipid biosynthetic process [GO:0008610]; response to drug [GO:0042493]	cytoplasm [GO:0005737]; cytosol [GO:0005829]	cytoplasm [GO:0005737]; cytosol [GO:0005829]; acyl binding [GO:0000035]; acyl carrier activity [GO:0000036]; lipid binding [GO:0008289]; phosphopantetheine binding [GO:0031177]; fatty acid biosynthetic process [GO:0006633]; lipid A biosynthetic process [GO:0009245]; lipid biosynthetic process [GO:0008610]; response to drug [GO:0042493]	acyl binding [GO:0000035]; acyl carrier activity [GO:0000036]; lipid binding [GO:0008289]; phosphopantetheine binding [GO:0031177]	SUBCELLULAR LOCATION: Cytoplasm.
ACRA_ECOLI	P0AE06	Multidrug efflux pump subunit AcrA (AcrAB-TolC multidrug efflux pump subunit AcrA) (Acridine resistance protein A)	acrA	89	73	-0.0451796	-0.240244	bile acid and bile salt transport [GO:0015721]; response to antibiotic [GO:0046677]; xenobiotic transport [GO:0042908]	efflux pump complex [GO:1990281]; intrinsic component of plasma membrane [GO:0031226]; outer membrane-bounded periplasmic space [GO:0030288]	efflux pump complex [GO:1990281]; intrinsic component of plasma membrane [GO:0031226]; outer membrane-bounded periplasmic space [GO:0030288]; identical protein binding [GO:0042802]; xenobiotic transmembrane transporter activity [GO:0042910]; bile acid and bile salt transport [GO:0015721]; response to antibiotic [GO:0046677]; xenobiotic transport [GO:0042908]	identical protein binding [GO:0042802]; xenobiotic transmembrane transporter activity [GO:0042910]	SUBCELLULAR LOCATION: Cell inner membrane {ECO:0000269|PubMed:15228545, ECO:0000269|PubMed:16079137}; Lipid-anchor {ECO:0000255|PROSITE-ProRule:PRU00303, ECO:0000269|PubMed:15228545, ECO:0000269|PubMed:16079137}. Note=An unlipidated version of this protein (directed to the periplasm by the OmpA signal sequence) functions normally.
ACRB_ECOLI	P31224	Multidrug efflux pump subunit AcrB (AcrAB-TolC multidrug efflux pump subunit AcrB) (Acridine resistance protein B)	acrB	81	79	0.0454821	-0.0430021		efflux pump complex [GO:1990281]; integral component of plasma membrane [GO:0005887]; membrane [GO:0016020]; outer membrane-bounded periplasmic space [GO:0030288]; plasma membrane [GO:0005886]	efflux pump complex [GO:1990281]; integral component of plasma membrane [GO:0005887]; membrane [GO:0016020]; outer membrane-bounded periplasmic space [GO:0030288]; plasma membrane [GO:0005886]; efflux transmembrane transporter activity [GO:0015562]; identical protein binding [GO:0042802]; xenobiotic transmembrane transporter activity [GO:0042910]	efflux transmembrane transporter activity [GO:0015562]; identical protein binding [GO:0042802]; xenobiotic transmembrane transporter activity [GO:0042910]	SUBCELLULAR LOCATION: Cell inner membrane {ECO:0000269|PubMed:15228545, ECO:0000269|PubMed:16079137}; Multi-pass membrane protein {ECO:0000269|PubMed:15228545, ECO:0000269|PubMed:16079137}.
ACRD_ECOLI	P24177	Probable aminoglycoside efflux pump (Acriflavine resistance protein D)	acrD	3	2	-0.0194314	-0.197081	bile acid and bile salt transport [GO:0015721]; response to antibiotic [GO:0046677]; response to toxic substance [GO:0009636]; xenobiotic transport [GO:0042908]	integral component of plasma membrane [GO:0005887]; membrane [GO:0016020]; plasma membrane [GO:0005886]	integral component of plasma membrane [GO:0005887]; membrane [GO:0016020]; plasma membrane [GO:0005886]; bile acid transmembrane transporter activity [GO:0015125]; efflux transmembrane transporter activity [GO:0015562]; xenobiotic transmembrane transporter activity [GO:0042910]; bile acid and bile salt transport [GO:0015721]; response to antibiotic [GO:0046677]; response to toxic substance [GO:00…	bile acid transmembrane transporter activity [GO:0015125]; efflux transmembrane transporter activity [GO:0015562]; xenobiotic transmembrane transporter activity [GO:0042910]	SUBCELLULAR LOCATION: Cell inner membrane {ECO:0000269|PubMed:15919996}; Multi-pass membrane protein {ECO:0000269|PubMed:15919996}.
ACRR_ECOLI	P0ACS9	HTH-type transcriptional regulator AcrR (Potential acrAB operon repressor)	acrR	2	2	0.0441814	-0.420901	negative regulation of transcription, DNA-templated [GO:0045892]; regulation of transcription, DNA-templated [GO:0006355]; response to drug [GO:0042493]; transcription, DNA-templated [GO:0006351]		DNA-binding transcription factor activity [GO:0003700]; drug binding [GO:0008144]; sequence-specific DNA binding [GO:0043565]; transcription cis-regulatory region binding [GO:0000976]; negative regulation of transcription, DNA-templated [GO:0045892]; regulation of transcription, DNA-templated [GO:0006355]; response to drug [GO:0042493]; transcription, DNA-templated [GO:0006351]	DNA-binding transcription factor activity [GO:0003700]; drug binding [GO:0008144]; sequence-specific DNA binding [GO:0043565]; transcription cis-regulatory region binding [GO:0000976]
ACSA_ECOLI	P27550	Acetyl-coenzyme A synthetase (AcCoA synthetase) (Acs) (EC 6.2.1.1) (Acetate--CoA ligase) (Acyl-activating enzyme)	acs	103	117	0.0430532	-1.08761	acetate catabolic process [GO:0045733]; acetyl-CoA biosynthetic process from acetate [GO:0019427]; chemotaxis [GO:0006935]; peptidyl-lysine acetylation [GO:0018394]; post-translational protein acetylation [GO:0034421]	cytosol [GO:0005829]	cytosol [GO:0005829]; acetate-CoA ligase activity [GO:0003987]; AMP binding [GO:0016208]; ATP binding [GO:0005524]; metal ion binding [GO:0046872]; propionate-CoA ligase activity [GO:0050218]; protein deacetylase activity [GO:0033558]; acetate catabolic process [GO:0045733]; acetyl-CoA biosynthetic process from acetate [GO:0019427]; chemotaxis [GO:0006935]; peptidyl-lysine acetylation [GO:0018394…	acetate-CoA ligase activity [GO:0003987]; AMP binding [GO:0016208]; ATP binding [GO:0005524]; metal ion binding [GO:0046872]; propionate-CoA ligase activity [GO:0050218]; protein deacetylase activity [GO:0033558]
ACTP_ECOLI	P32705	Cation/acetate symporter ActP (Acetate permease) (Acetate transporter ActP)	actP	9	12	0.0591146	-0.904389	plasma membrane acetate transport [GO:0006847]; sodium ion transport [GO:0006814]; tellurite transport [GO:0015710]	integral component of plasma membrane [GO:0005887]; plasma membrane [GO:0005886]	integral component of plasma membrane [GO:0005887]; plasma membrane [GO:0005886]; acetate transmembrane transporter activity [GO:0015123]; glycolate transmembrane transporter activity [GO:0043879]; symporter activity [GO:0015293]; tellurite transmembrane transporter activity [GO:0015654]; plasma membrane acetate transport [GO:0006847]; sodium ion transport [GO:0006814]; tellurite transport [GO:00…	acetate transmembrane transporter activity [GO:0015123]; glycolate transmembrane transporter activity [GO:0043879]; symporter activity [GO:0015293]; tellurite transmembrane transporter activity [GO:0015654]	SUBCELLULAR LOCATION: Cell inner membrane {ECO:0000269|PubMed:16079137}; Multi-pass membrane protein {ECO:0000269|PubMed:16079137}.
ACUI_ECOLI	P26646	Probable acrylyl-CoA reductase AcuI (EC 1.3.1.84) (Acryloyl-coenzyme A reductase AcuI)	acuI	59	50	-0.0816858	-0.171127		cytoplasm [GO:0005737]	cytoplasm [GO:0005737]; acryloyl-CoA reductase (NADP+) activity [GO:0043957]	acryloyl-CoA reductase (NADP+) activity [GO:0043957]	SUBCELLULAR LOCATION: Cytoplasm {ECO:0000305}.
ACYP_ECOLI	P0AB65	Acylphosphatase (EC 3.6.1.7) (Acylphosphate phosphohydrolase)	yccX	3	5	-0.0398579	-0.475641	response to heat [GO:0009408]		acylphosphatase activity [GO:0003998]; response to heat [GO:0009408]	acylphosphatase activity [GO:0003998]
ADD_ECOLI	P22333	Adenosine deaminase (EC 3.5.4.4) (Adenosine aminohydrolase)	add	21	16	0.0660828	1.00013	adenosine catabolic process [GO:0006154]; cellular response to DNA damage stimulus [GO:0006974]; hypoxanthine biosynthetic process [GO:0046101]; hypoxanthine salvage [GO:0043103]; inosine biosynthetic process [GO:0046103]; purine nucleotide interconversion [GO:0015950]; purine nucleotide salvage [GO:0032261]; purine ribonucleoside monophosphate biosynthetic process [GO:0009168]	cytosol [GO:0005829]	cytosol [GO:0005829]; adenosine deaminase activity [GO:0004000]; zinc ion binding [GO:0008270]; adenosine catabolic process [GO:0006154]; cellular response to DNA damage stimulus [GO:0006974]; hypoxanthine biosynthetic process [GO:0046101]; hypoxanthine salvage [GO:0043103]; inosine biosynthetic process [GO:0046103]; purine nucleotide interconversion [GO:0015950]; purine nucleotide salvage [GO:00…	adenosine deaminase activity [GO:0004000]; zinc ion binding [GO:0008270]
ADEC_ECOLI	P31441	Adenine deaminase (Adenase) (Adenine aminase) (EC 3.5.4.2)	ade	4	8	0.077057	-0.223508	adenine catabolic process [GO:0006146]		adenine deaminase activity [GO:0000034]; catalase activity [GO:0004096]; ferrous iron binding [GO:0008198]; manganese ion binding [GO:0030145]; adenine catabolic process [GO:0006146]	adenine deaminase activity [GO:0000034]; catalase activity [GO:0004096]; ferrous iron binding [GO:0008198]; manganese ion binding [GO:0030145]
ADEP_ECOLI	P31466	Adenine permease AdeP	adeP	1	2	0.0409103	-0.646154	adenine transport [GO:0015853]	integral component of membrane [GO:0016021]; plasma membrane [GO:0005886]	integral component of membrane [GO:0016021]; plasma membrane [GO:0005886]; adenine transmembrane transporter activity [GO:0015207]; purine nucleobase transmembrane transporter activity [GO:0005345]; solute:proton symporter activity [GO:0015295]; adenine transport [GO:0015853]	adenine transmembrane transporter activity [GO:0015207]; purine nucleobase transmembrane transporter activity [GO:0005345]; solute:proton symporter activity [GO:0015295]	SUBCELLULAR LOCATION: Cell inner membrane {ECO:0000269|PubMed:15919996, ECO:0000269|PubMed:24214977}; Multi-pass membrane protein {ECO:0000269|PubMed:15919996, ECO:0000269|PubMed:24214977}.
ADHE_ECOLI	P0A9Q7	Aldehyde-alcohol dehydrogenase [Includes: Alcohol dehydrogenase (ADH) (EC 1.1.1.1); Acetaldehyde dehydrogenase [acetylating] (ACDH) (EC 1.2.1.10); Pyruvate-formate-lyase deactivase (PFL deactivase)]	adhE	233	215	-0.0781896	-0.204215	carbon utilization [GO:0015976]; ethanol biosynthetic process [GO:0006115]	cytosol [GO:0005829]; membrane [GO:0016020]	cytosol [GO:0005829]; membrane [GO:0016020]; acetaldehyde dehydrogenase (acetylating) activity [GO:0008774]; alcohol dehydrogenase (NAD+) activity [GO:0004022]; identical protein binding [GO:0042802]; metal ion binding [GO:0046872]; carbon utilization [GO:0015976]; ethanol biosynthetic process [GO:0006115]	acetaldehyde dehydrogenase (acetylating) activity [GO:0008774]; alcohol dehydrogenase (NAD+) activity [GO:0004022]; identical protein binding [GO:0042802]; metal ion binding [GO:0046872]
ADHP_ECOLI	P39451	Alcohol dehydrogenase, propanol-preferring (EC 1.1.1.1)	adhP	1	5	-0.135424	-0.521881	acetaldehyde catabolic process [GO:0046187]; cellular response to DNA damage stimulus [GO:0006974]; response to ethanol [GO:0045471]		alcohol dehydrogenase (NAD+) activity [GO:0004022]; oxidoreductase activity, acting on the CH-OH group of donors, NAD or NADP as acceptor [GO:0016616]; zinc ion binding [GO:0008270]; acetaldehyde catabolic process [GO:0046187]; cellular response to DNA damage stimulus [GO:0006974]; response to ethanol [GO:0045471]	alcohol dehydrogenase (NAD+) activity [GO:0004022]; oxidoreductase activity, acting on the CH-OH group of donors, NAD or NADP as acceptor [GO:0016616]; zinc ion binding [GO:0008270]
ADPP_ECOLI	Q93K97	ADP-ribose pyrophosphatase (EC 3.6.1.13) (ADP-ribose diphosphatase) (ADP-ribose phosphohydrolase) (ASPPase) (Adenosine diphosphoribose pyrophosphatase) (ADPR-PPase)	nudF	7	6	-0.0298464	0.175079	nucleoside phosphate metabolic process [GO:0006753]; response to heat [GO:0009408]; ribose phosphate metabolic process [GO:0019693]	cytosol [GO:0005829]	cytosol [GO:0005829]; ADP-ribose diphosphatase activity [GO:0047631]; ADP-sugar diphosphatase activity [GO:0019144]; magnesium ion binding [GO:0000287]; pyrophosphatase activity [GO:0016462]; nucleoside phosphate metabolic process [GO:0006753]; response to heat [GO:0009408]; ribose phosphate metabolic process [GO:0019693]	ADP-ribose diphosphatase activity [GO:0047631]; ADP-sugar diphosphatase activity [GO:0019144]; magnesium ion binding [GO:0000287]; pyrophosphatase activity [GO:0016462]
AEEP_ECOLI	P51981	L-Ala-D/L-Glu epimerase (AE epimerase) (AEE) (EC 5.1.1.20)	ycjG	3	10	-0.114288	-0.336506	cellular amino acid catabolic process [GO:0009063]; cell wall organization [GO:0071555]; peptidoglycan turnover [GO:0009254]		L-Ala-D/L-Glu epimerase activity [GO:0103031]; metal ion binding [GO:0046872]; racemase and epimerase activity, acting on amino acids and derivatives [GO:0016855]; cell wall organization [GO:0071555]; cellular amino acid catabolic process [GO:0009063]; peptidoglycan turnover [GO:0009254]	L-Ala-D/L-Glu epimerase activity [GO:0103031]; metal ion binding [GO:0046872]; racemase and epimerase activity, acting on amino acids and derivatives [GO:0016855]
AES_ECOLI	P23872	Acetyl esterase (EC 3.1.1.-) (EcE)	aes	3	7	0.018856	0.0232571	negative regulation of DNA-binding transcription factor activity [GO:0043433]; negative regulation of hydrolase activity [GO:0051346]	cytoplasm [GO:0005737]	cytoplasm [GO:0005737]; acetylesterase activity [GO:0008126]; hydrolase activity [GO:0016787]; short-chain carboxylesterase activity [GO:0034338]; negative regulation of DNA-binding transcription factor activity [GO:0043433]; negative regulation of hydrolase activity [GO:0051346]	acetylesterase activity [GO:0008126]; hydrolase activity [GO:0016787]; short-chain carboxylesterase activity [GO:0034338]	SUBCELLULAR LOCATION: Cytoplasm {ECO:0000269|PubMed:9576853}.
AG43_ECOLI	P39180	Antigen 43 (AG43) (Fluffing protein) [Cleaved into: Antigen 43 alpha chain; Antigen 43 beta chain]	flu	152	101	0.394048	-0.922087		cell outer membrane [GO:0009279]; cell surface [GO:0009986]; extracellular region [GO:0005576]; integral component of membrane [GO:0016021]; periplasmic space [GO:0042597]	cell outer membrane [GO:0009279]; cell surface [GO:0009986]; extracellular region [GO:0005576]; integral component of membrane [GO:0016021]; periplasmic space [GO:0042597]		SUBCELLULAR LOCATION: [Antigen 43]: Periplasm {ECO:0000250}.; SUBCELLULAR LOCATION: [Antigen 43 alpha chain]: Secreted. Cell surface {ECO:0000269|PubMed:22466966}. Note=The cell surface component is about 60 kDa and can be released by mild heat treatment (PubMed:22466966).; SUBCELLULAR LOCATION: [Antigen 43 beta chain]: Cell outer membrane {ECO:0000305|PubMed:25341963}; Multi-pass membrane protei…
AGAL_ECOLI	P06720	Alpha-galactosidase (EC 3.2.1.22) (Melibiase)	melA	4	5	0.465042	-0.157304	melibiose catabolic process [GO:0005995]	cytosol [GO:0005829]	cytosol [GO:0005829]; alpha-galactosidase activity [GO:0004557]; manganese ion binding [GO:0030145]; NAD+ binding [GO:0070403]; oxidoreductase activity, acting on the CH-OH group of donors, NAD or NADP as acceptor [GO:0016616]; raffinose alpha-galactosidase activity [GO:0052692]; melibiose catabolic process [GO:0005995]	alpha-galactosidase activity [GO:0004557]; manganese ion binding [GO:0030145]; NAD+ binding [GO:0070403]; oxidoreductase activity, acting on the CH-OH group of donors, NAD or NADP as acceptor [GO:0016616]; raffinose alpha-galactosidase activity [GO:0052692]
AGAR_ECOLI	P0ACK2	Putative aga operon transcriptional repressor	agaR	6	5	-0.035426	-0.576927	regulation of transcription, DNA-templated [GO:0006355]		DNA binding [GO:0003677]; DNA-binding transcription factor activity [GO:0003700]; regulation of transcription, DNA-templated [GO:0006355]	DNA binding [GO:0003677]; DNA-binding transcription factor activity [GO:0003700]
AGAS_ECOLI	P42907	Putative D-galactosamine-6-phosphate deaminase AgaS (EC 3.5.99.-) (Gam-6-P deaminase/isomerase)	agaS	3	1	-0.37362	-0.283731	carbohydrate derivative metabolic process [GO:1901135]; phosphoenolpyruvate-dependent sugar phosphotransferase system [GO:0009401]	integral component of plasma membrane [GO:0005887]	integral component of plasma membrane [GO:0005887]; carbohydrate derivative binding [GO:0097367]; hydrolase activity [GO:0016787]; isomerase activity [GO:0016853]; carbohydrate derivative metabolic process [GO:1901135]; phosphoenolpyruvate-dependent sugar phosphotransferase system [GO:0009401]	carbohydrate derivative binding [GO:0097367]; hydrolase activity [GO:0016787]; isomerase activity [GO:0016853]
AGP_ECOLI	P19926	Glucose-1-phosphatase (G1Pase) (EC 3.1.3.10)	agp	54	45	-0.0304146	-0.395615	dephosphorylation [GO:0016311]; glucose catabolic process [GO:0006007]	outer membrane-bounded periplasmic space [GO:0030288]	outer membrane-bounded periplasmic space [GO:0030288]; 3-phytase activity [GO:0016158]; glucose-1-phosphatase activity [GO:0008877]; phosphatase activity [GO:0016791]; sugar-phosphatase activity [GO:0050308]; dephosphorylation [GO:0016311]; glucose catabolic process [GO:0006007]	3-phytase activity [GO:0016158]; glucose-1-phosphatase activity [GO:0008877]; phosphatase activity [GO:0016791]; sugar-phosphatase activity [GO:0050308]	SUBCELLULAR LOCATION: Periplasm.
AHPC_ECOLI	P0AE08	Alkyl hydroperoxide reductase C (EC 1.11.1.26) (Alkyl hydroperoxide reductase protein C22) (Peroxiredoxin) (SCRP-23) (Sulfate starvation-induced protein 8) (SSI8) (Thioredoxin peroxidase)	ahpC	140	111	0.0244086	0.0743573	cell redox homeostasis [GO:0045454]; cellular response to sulfate starvation [GO:0009970]; response to alkyl hydroperoxide [GO:0033195]; response to hydroperoxide [GO:0033194]; siderophore biosynthetic process [GO:0019290]	alkyl hydroperoxide reductase complex [GO:0009321]; cytoplasm [GO:0005737]; cytosol [GO:0005829]; membrane [GO:0016020]	alkyl hydroperoxide reductase complex [GO:0009321]; cytoplasm [GO:0005737]; cytosol [GO:0005829]; membrane [GO:0016020]; alkylhydroperoxide reductase activity [GO:0102039]; hydroperoxide reductase activity [GO:0032843]; identical protein binding [GO:0042802]; oxidoreductase activity, acting on peroxide as acceptor [GO:0016684]; peroxidase activity [GO:0004601]; peroxiredoxin activity [GO:0051920]…	alkylhydroperoxide reductase activity [GO:0102039]; hydroperoxide reductase activity [GO:0032843]; identical protein binding [GO:0042802]; oxidoreductase activity, acting on peroxide as acceptor [GO:0016684]; peroxidase activity [GO:0004601]; peroxiredoxin activity [GO:0051920]	SUBCELLULAR LOCATION: Cytoplasm {ECO:0000269|PubMed:7499381}.
AHPF_ECOLI	P35340	Alkyl hydroperoxide reductase subunit F (EC 1.8.1.-) (Alkyl hydroperoxide reductase F52A protein)	ahpF	150	118	0.0133168	0.11574	response to reactive oxygen species [GO:0000302]	alkyl hydroperoxide reductase complex [GO:0009321]; cytosol [GO:0005829]	alkyl hydroperoxide reductase complex [GO:0009321]; cytosol [GO:0005829]; alkyl hydroperoxide reductase activity [GO:0008785]; FAD binding [GO:0071949]; NAD binding [GO:0051287]; response to reactive oxygen species [GO:0000302]	alkyl hydroperoxide reductase activity [GO:0008785]; FAD binding [GO:0071949]; NAD binding [GO:0051287]
AHR_ECOLI	P27250	Aldehyde reductase Ahr (EC 1.1.1.2) (Zinc-dependent alcohol dehydrogenase Ahr)	ahr	7	15	-0.0764307	-0.0323274	fatty acid metabolic process [GO:0006631]		alcohol dehydrogenase (NADP+) activity [GO:0008106]; oxidoreductase activity, acting on the CH-OH group of donors, NAD or NADP as acceptor [GO:0016616]; zinc ion binding [GO:0008270]; fatty acid metabolic process [GO:0006631]	alcohol dehydrogenase (NADP+) activity [GO:0008106]; oxidoreductase activity, acting on the CH-OH group of donors, NAD or NADP as acceptor [GO:0016616]; zinc ion binding [GO:0008270]
AIDB_ECOLI	P33224	Putative acyl-CoA dehydrogenase AidB (EC 1.3.99.-)	aidB	3	4	0.026574	-0.33347	cellular response to DNA damage stimulus [GO:0006974]; negative regulation of transcription, DNA-templated [GO:0045892]	cytoplasm [GO:0005737]	cytoplasm [GO:0005737]; DNA binding [GO:0003677]; identical protein binding [GO:0042802]; isovaleryl-CoA dehydrogenase activity [GO:0008470]; sequence-specific DNA binding [GO:0043565]; cellular response to DNA damage stimulus [GO:0006974]; negative regulation of transcription, DNA-templated [GO:0045892]	DNA binding [GO:0003677]; identical protein binding [GO:0042802]; isovaleryl-CoA dehydrogenase activity [GO:0008470]; sequence-specific DNA binding [GO:0043565]	SUBCELLULAR LOCATION: Cytoplasm {ECO:0000305}.
AK1H_ECOLI	P00561	Bifunctional aspartokinase/homoserine dehydrogenase 1 (Aspartokinase I/homoserine dehydrogenase I) (AKI-HDI) [Includes: Aspartokinase (EC 2.7.2.4); Homoserine dehydrogenase (EC 1.1.1.3)]	thrA	145	124	-0.00884103	-0.277366	homoserine biosynthetic process [GO:0009090]; lysine biosynthetic process via diaminopimelate [GO:0009089]; threonine biosynthetic process [GO:0009088]		aspartate kinase activity [GO:0004072]; ATP binding [GO:0005524]; homoserine dehydrogenase activity [GO:0004412]; NADP binding [GO:0050661]; homoserine biosynthetic process [GO:0009090]; lysine biosynthetic process via diaminopimelate [GO:0009089]; threonine biosynthetic process [GO:0009088]	aspartate kinase activity [GO:0004072]; ATP binding [GO:0005524]; homoserine dehydrogenase activity [GO:0004412]; NADP binding [GO:0050661]
AK2H_ECOLI	P00562	Bifunctional aspartokinase/homoserine dehydrogenase 2 (Aspartokinase II/homoserine dehydrogenase II) (AKII-HDII) [Includes: Aspartokinase (EC 2.7.2.4); Homoserine dehydrogenase (EC 1.1.1.3)]	metL	42	41	0.0836286	0.00506955	homoserine biosynthetic process [GO:0009090]; lysine biosynthetic process via diaminopimelate [GO:0009089]; methionine biosynthetic process [GO:0009086]; threonine biosynthetic process [GO:0009088]	cytosol [GO:0005829]	cytosol [GO:0005829]; aspartate kinase activity [GO:0004072]; ATP binding [GO:0005524]; homoserine dehydrogenase activity [GO:0004412]; NADP binding [GO:0050661]; homoserine biosynthetic process [GO:0009090]; lysine biosynthetic process via diaminopimelate [GO:0009089]; methionine biosynthetic process [GO:0009086]; threonine biosynthetic process [GO:0009088]	aspartate kinase activity [GO:0004072]; ATP binding [GO:0005524]; homoserine dehydrogenase activity [GO:0004412]; NADP binding [GO:0050661]
AK3_ECOLI	P08660	Lysine-sensitive aspartokinase 3 (EC 2.7.2.4) (Aspartate kinase III) (AKIII) (Lysine-sensitive aspartokinase III)	lysC	18	20	-0.0633972	-0.556523	homoserine biosynthetic process [GO:0009090]; lysine biosynthetic process via diaminopimelate [GO:0009089]	cytosol [GO:0005829]	cytosol [GO:0005829]; aspartate kinase activity [GO:0004072]; ATP binding [GO:0005524]; homoserine biosynthetic process [GO:0009090]; lysine biosynthetic process via diaminopimelate [GO:0009089]	aspartate kinase activity [GO:0004072]; ATP binding [GO:0005524]
ALAA_ECOLI	P0A959	Glutamate-pyruvate aminotransferase AlaA (EC 2.6.1.2)	alaA	36	50	-0.107744	0.0555091	alanine biosynthetic process [GO:0006523]; cellular response to DNA damage stimulus [GO:0006974]; D-alanine biosynthetic process [GO:0030632]; L-alanine biosynthetic process from pyruvate [GO:0019272]; response to antibiotic [GO:0046677]	cytoplasm [GO:0005737]	cytoplasm [GO:0005737]; L-alanine:2-oxoglutarate aminotransferase activity [GO:0004021]; pyridoxal phosphate binding [GO:0030170]; transaminase activity [GO:0008483]; alanine biosynthetic process [GO:0006523]; cellular response to DNA damage stimulus [GO:0006974]; D-alanine biosynthetic process [GO:0030632]; L-alanine biosynthetic process from pyruvate [GO:0019272]; response to antibiotic [GO:004…	L-alanine:2-oxoglutarate aminotransferase activity [GO:0004021]; pyridoxal phosphate binding [GO:0030170]; transaminase activity [GO:0008483]	SUBCELLULAR LOCATION: Cytoplasm {ECO:0000250}.
ALAC_ECOLI	P77434	Glutamate-pyruvate aminotransferase AlaC (EC 2.6.1.2)	alaC	19	15	-0.0302102	-0.375845	alanine biosynthetic process [GO:0006523]; D-alanine biosynthetic process [GO:0030632]; L-alanine biosynthetic process from pyruvate [GO:0019272]	cytoplasm [GO:0005737]	cytoplasm [GO:0005737]; L-alanine:2-oxoglutarate aminotransferase activity [GO:0004021]; pyridoxal phosphate binding [GO:0030170]; transaminase activity [GO:0008483]; alanine biosynthetic process [GO:0006523]; D-alanine biosynthetic process [GO:0030632]; L-alanine biosynthetic process from pyruvate [GO:0019272]	L-alanine:2-oxoglutarate aminotransferase activity [GO:0004021]; pyridoxal phosphate binding [GO:0030170]; transaminase activity [GO:0008483]	SUBCELLULAR LOCATION: Cytoplasm {ECO:0000250}.
ALDA_ECOLI	P25553	Lactaldehyde dehydrogenase (EC 1.2.1.22) (Aldehyde dehydrogenase A) (Glycolaldehyde dehydrogenase) (EC 1.2.1.21)	aldA	184	151	0.0762179	-0.968237	L-fucose catabolic process [GO:0042355]; rhamnose catabolic process [GO:0019301]	cytosol [GO:0005829]; protein-containing complex [GO:0032991]	cytosol [GO:0005829]; protein-containing complex [GO:0032991]; glycolaldehyde dehydrogenase activity [GO:0050569]; identical protein binding [GO:0042802]; lactaldehyde dehydrogenase activity [GO:0008911]; succinate-semialdehyde dehydrogenase (NAD+) activity [GO:0004777]; L-fucose catabolic process [GO:0042355]; rhamnose catabolic process [GO:0019301]	glycolaldehyde dehydrogenase activity [GO:0050569]; identical protein binding [GO:0042802]; lactaldehyde dehydrogenase activity [GO:0008911]; succinate-semialdehyde dehydrogenase (NAD+) activity [GO:0004777]
ALDB_ECOLI	P37685	Aldehyde dehydrogenase B (EC 1.2.1.4) (Acetaldehyde dehydrogenase)	aldB	19	23	-0.0600515	-1.22103	cellular response to DNA damage stimulus [GO:0006974]; response to ethanol [GO:0045471]		aldehyde dehydrogenase (NAD+) activity [GO:0004029]; aldehyde dehydrogenase (NADP+) activity [GO:0033721]; oxidoreductase activity [GO:0016491]; cellular response to DNA damage stimulus [GO:0006974]; response to ethanol [GO:0045471]	aldehyde dehydrogenase (NAD+) activity [GO:0004029]; aldehyde dehydrogenase (NADP+) activity [GO:0033721]; oxidoreductase activity [GO:0016491]
ALF1_ECOLI	P0A991	Fructose-bisphosphate aldolase class 1 (EC 4.1.2.13) (Fructose-bisphosphate aldolase class I) (FBP aldolase)	fbaB	86	67	-0.229955	-0.387365	glycolytic process [GO:0006096]	cytosol [GO:0005829]; membrane [GO:0016020]	cytosol [GO:0005829]; membrane [GO:0016020]; fructose-bisphosphate aldolase activity [GO:0004332]; identical protein binding [GO:0042802]; glycolytic process [GO:0006096]	fructose-bisphosphate aldolase activity [GO:0004332]; identical protein binding [GO:0042802]	SUBCELLULAR LOCATION: Cytoplasm {ECO:0000305}.
ALF_ECOLI	P0AB71	Fructose-bisphosphate aldolase class 2 (FBP aldolase) (FBPA) (EC 4.1.2.13) (Fructose-1,6-bisphosphate aldolase) (Fructose-bisphosphate aldolase class II)	fbaA	138	103	-0.077024	0.164295	gluconeogenesis [GO:0006094]; glycolytic process [GO:0006096]	cytosol [GO:0005829]	cytosol [GO:0005829]; fructose-bisphosphate aldolase activity [GO:0004332]; identical protein binding [GO:0042802]; zinc ion binding [GO:0008270]; gluconeogenesis [GO:0006094]; glycolytic process [GO:0006096]	fructose-bisphosphate aldolase activity [GO:0004332]; identical protein binding [GO:0042802]; zinc ion binding [GO:0008270]
ALKH_ECOLI	P0A955	KHG/KDPG aldolase [Includes: 4-hydroxy-2-oxoglutarate aldolase (EC 4.1.3.16) (2-keto-4-hydroxyglutarate aldolase) (KHG-aldolase); 2-dehydro-3-deoxy-phosphogluconate aldolase (EC 4.1.2.14) (2-keto-3-deoxy-6-phosphogluconate aldolase) (KDPG-aldolase) (Phospho-2-dehydro-3-deoxygluconate aldolase) (Phospho-2-keto-3-deoxygluconate aldolase)]	eda	88	82	-0.0179369	0.547749	metabolic process [GO:0008152]	cytosol [GO:0005829]; membrane [GO:0016020]	cytosol [GO:0005829]; membrane [GO:0016020]; (4S)-4-hydroxy-2-oxoglutarate aldolase activity [GO:0106009]; 2-dehydro-3-deoxy-phosphogluconate aldolase activity [GO:0008675]; 4-hydroxy-2-oxoglutarate aldolase activity [GO:0008700]; identical protein binding [GO:0042802]; oxaloacetate decarboxylase activity [GO:0008948]; oxo-acid-lyase activity [GO:0016833]; metabolic process [GO:0008152]	(4S)-4-hydroxy-2-oxoglutarate aldolase activity [GO:0106009]; 2-dehydro-3-deoxy-phosphogluconate aldolase activity [GO:0008675]; 4-hydroxy-2-oxoglutarate aldolase activity [GO:0008700]; identical protein binding [GO:0042802]; oxaloacetate decarboxylase activity [GO:0008948]; oxo-acid-lyase activity [GO:0016833]	SUBCELLULAR LOCATION: Cytoplasm {ECO:0000250}.
ALLB_ECOLI	P77671	Allantoinase (EC 3.5.2.5) (Allantoin-utilizing enzyme)	allB	3	1	-0.0370905	0.188091	allantoin assimilation pathway [GO:0009442]; purine nucleobase catabolic process [GO:0006145]	cytoplasm [GO:0005737]	cytoplasm [GO:0005737]; allantoinase activity [GO:0004038]; cobalt ion binding [GO:0050897]; zinc ion binding [GO:0008270]; allantoin assimilation pathway [GO:0009442]; purine nucleobase catabolic process [GO:0006145]	allantoinase activity [GO:0004038]; cobalt ion binding [GO:0050897]; zinc ion binding [GO:0008270]
ALLE_ECOLI	P75713	(S)-ureidoglycine aminohydrolase (UGHY) (UGlyAH) (EC 3.5.3.26)	allE	7	7	-0.0502649	-0.187566	purine nucleobase metabolic process [GO:0006144]	cytoplasm [GO:0005737]	cytoplasm [GO:0005737]; manganese ion binding [GO:0030145]; ureidoglycine aminohydrolase activity [GO:0071522]; purine nucleobase metabolic process [GO:0006144]	manganese ion binding [GO:0030145]; ureidoglycine aminohydrolase activity [GO:0071522]	SUBCELLULAR LOCATION: Cytoplasm {ECO:0000269|PubMed:19935661, ECO:0000269|PubMed:20038185}.
ALLR_ECOLI	P0ACN4	HTH-type transcriptional repressor AllR (Negative regulator of allantoin and glyoxylate utilization operons)	allR	25	25	-0.059934	-0.747079	cellular response to DNA damage stimulus [GO:0006974]; negative regulation of transcription, DNA-templated [GO:0045892]	cytosol [GO:0005829]	cytosol [GO:0005829]; DNA binding [GO:0003677]; DNA-binding transcription factor activity [GO:0003700]; identical protein binding [GO:0042802]; cellular response to DNA damage stimulus [GO:0006974]; negative regulation of transcription, DNA-templated [GO:0045892]	DNA binding [GO:0003677]; DNA-binding transcription factor activity [GO:0003700]; identical protein binding [GO:0042802]
ALR1_ECOLI	P0A6B4	Alanine racemase, biosynthetic (EC 5.1.1.1)	alr	10	10	0.0100492	-0.0624436	cell wall organization [GO:0071555]; D-alanine biosynthetic process [GO:0030632]; peptidoglycan biosynthetic process [GO:0009252]; regulation of cell shape [GO:0008360]	cytosol [GO:0005829]	cytosol [GO:0005829]; alanine racemase activity [GO:0008784]; pyridoxal phosphate binding [GO:0030170]; cell wall organization [GO:0071555]; D-alanine biosynthetic process [GO:0030632]; peptidoglycan biosynthetic process [GO:0009252]; regulation of cell shape [GO:0008360]	alanine racemase activity [GO:0008784]; pyridoxal phosphate binding [GO:0030170]
ALR2_ECOLI	P29012	Alanine racemase, catabolic (EC 5.1.1.1)	dadX	29	27	0.0702163	-0.494039	D-alanine biosynthetic process [GO:0030632]; L-alanine oxidation to pyruvate via D-alanine [GO:0019480]	cytosol [GO:0005829]	cytosol [GO:0005829]; alanine racemase activity [GO:0008784]; pyridoxal phosphate binding [GO:0030170]; D-alanine biosynthetic process [GO:0030632]; L-alanine oxidation to pyruvate via D-alanine [GO:0019480]	alanine racemase activity [GO:0008784]; pyridoxal phosphate binding [GO:0030170]
ALSB_ECOLI	P39265	D-allose-binding periplasmic protein (ALBP)	alsB	15	12	0.0242325	-0.323658	carbohydrate transport [GO:0008643]	membrane [GO:0016020]; outer membrane-bounded periplasmic space [GO:0030288]	membrane [GO:0016020]; outer membrane-bounded periplasmic space [GO:0030288]; monosaccharide binding [GO:0048029]; carbohydrate transport [GO:0008643]	monosaccharide binding [GO:0048029]	SUBCELLULAR LOCATION: Periplasm.
AMIA_ECOLI	P36548	N-acetylmuramoyl-L-alanine amidase AmiA (EC 3.5.1.28)	amiA	14	9	-0.0187561	-0.269223	cell wall organization [GO:0071555]; peptidoglycan catabolic process [GO:0009253]	outer membrane-bounded periplasmic space [GO:0030288]; periplasmic space [GO:0042597]	outer membrane-bounded periplasmic space [GO:0030288]; periplasmic space [GO:0042597]; N-acetylmuramoyl-L-alanine amidase activity [GO:0008745]; zinc ion binding [GO:0008270]; cell wall organization [GO:0071555]; peptidoglycan catabolic process [GO:0009253]	N-acetylmuramoyl-L-alanine amidase activity [GO:0008745]; zinc ion binding [GO:0008270]	SUBCELLULAR LOCATION: Periplasm {ECO:0000269|PubMed:12787347}. Note=Distributed throughout the periplasm in all cells.
AMIB_ECOLI	P26365	N-acetylmuramoyl-L-alanine amidase AmiB (EC 3.5.1.28)	amiB	13	10	-0.0971465	0.091766	cell wall organization [GO:0071555]; FtsZ-dependent cytokinesis [GO:0043093]; peptidoglycan catabolic process [GO:0009253]	outer membrane-bounded periplasmic space [GO:0030288]	outer membrane-bounded periplasmic space [GO:0030288]; N-acetylmuramoyl-L-alanine amidase activity [GO:0008745]; cell wall organization [GO:0071555]; FtsZ-dependent cytokinesis [GO:0043093]; peptidoglycan catabolic process [GO:0009253]	N-acetylmuramoyl-L-alanine amidase activity [GO:0008745]	SUBCELLULAR LOCATION: Periplasm {ECO:0000250}.
AMIC_ECOLI	P63883	N-acetylmuramoyl-L-alanine amidase AmiC (EC 3.5.1.28)	amiC	10	6	-0.0133401	-0.689314	cell wall organization [GO:0071555]; FtsZ-dependent cytokinesis [GO:0043093]; peptidoglycan catabolic process [GO:0009253]	outer membrane-bounded periplasmic space [GO:0030288]; periplasmic space [GO:0042597]	outer membrane-bounded periplasmic space [GO:0030288]; periplasmic space [GO:0042597]; N-acetylmuramoyl-L-alanine amidase activity [GO:0008745]; cell wall organization [GO:0071555]; FtsZ-dependent cytokinesis [GO:0043093]; peptidoglycan catabolic process [GO:0009253]	N-acetylmuramoyl-L-alanine amidase activity [GO:0008745]	SUBCELLULAR LOCATION: Periplasm {ECO:0000269|PubMed:12787347}. Note=Present throughout the periplasm in non-dividing cells, but localizes almost exclusively to a ring at the site of constriction in dividing cells.
AMID_ECOLI	P75820	N-acetylmuramoyl-L-alanine amidase AmiD (EC 3.5.1.28)	amiD	6	9	-0.0839387	-0.4194	cell wall organization [GO:0071555]; peptidoglycan catabolic process [GO:0009253]; peptidoglycan turnover [GO:0009254]	cell outer membrane [GO:0009279]; outer membrane [GO:0019867]	cell outer membrane [GO:0009279]; outer membrane [GO:0019867]; N-acetyl-anhydromuramoyl-L-alanine amidase activity [GO:0009392]; N-acetylmuramoyl-L-alanine amidase activity [GO:0008745]; zinc ion binding [GO:0008270]; cell wall organization [GO:0071555]; peptidoglycan catabolic process [GO:0009253]; peptidoglycan turnover [GO:0009254]	N-acetyl-anhydromuramoyl-L-alanine amidase activity [GO:0009392]; N-acetylmuramoyl-L-alanine amidase activity [GO:0008745]; zinc ion binding [GO:0008270]	SUBCELLULAR LOCATION: Cell outer membrane {ECO:0000305}; Lipid-anchor {ECO:0000305}.
AMN_ECOLI	P0AE12	AMP nucleosidase (EC 3.2.2.4)	amn	30	32	0.0149934	0.374723	AMP salvage [GO:0044209]; nucleoside metabolic process [GO:0009116]	cytosol [GO:0005829]	cytosol [GO:0005829]; AMP nucleosidase activity [GO:0008714]; AMP salvage [GO:0044209]; nucleoside metabolic process [GO:0009116]	AMP nucleosidase activity [GO:0008714]
AMPA_ECOLI	P68767	Cytosol aminopeptidase (EC 3.4.11.1) (Aminopeptidase A/I) (Leucine aminopeptidase) (LAP) (EC 3.4.11.10) (Leucyl aminopeptidase)	pepA	59	44	-0.0223753	-0.0415708	peptide catabolic process [GO:0043171]; plasmid maintenance [GO:0006276]; plasmid recombination [GO:0042150]; transcription, DNA-templated [GO:0006351]	cytoplasm [GO:0005737]	cytoplasm [GO:0005737]; aminopeptidase activity [GO:0004177]; DNA binding [GO:0003677]; manganese ion binding [GO:0030145]; metalloaminopeptidase activity [GO:0070006]; transcription antitermination factor activity, DNA binding [GO:0001073]; peptide catabolic process [GO:0043171]; plasmid maintenance [GO:0006276]; plasmid recombination [GO:0042150]; transcription, DNA-templated [GO:0006351]	aminopeptidase activity [GO:0004177]; DNA binding [GO:0003677]; manganese ion binding [GO:0030145]; metalloaminopeptidase activity [GO:0070006]; transcription antitermination factor activity, DNA binding [GO:0001073]
AMPC_ECOLI	P00811	Beta-lactamase (EC 3.5.2.6) (Cephalosporinase)	ampC	12	18	-0.0691776	-0.469655	antibiotic catabolic process [GO:0017001]; response to antibiotic [GO:0046677]	outer membrane-bounded periplasmic space [GO:0030288]	outer membrane-bounded periplasmic space [GO:0030288]; beta-lactamase activity [GO:0008800]; antibiotic catabolic process [GO:0017001]; response to antibiotic [GO:0046677]	beta-lactamase activity [GO:0008800]	SUBCELLULAR LOCATION: Periplasm.
AMPD_ECOLI	P13016	1,6-anhydro-N-acetylmuramyl-L-alanine amidase AmpD (EC 3.5.1.28) (N-acetylmuramoyl-L-alanine amidase)	ampD	6	7	-0.0923459	0.142854	cell wall organization [GO:0071555]; peptidoglycan catabolic process [GO:0009253]; peptidoglycan turnover [GO:0009254]	cytoplasm [GO:0005737]	cytoplasm [GO:0005737]; metal ion binding [GO:0046872]; N-acetyl-anhydromuramoyl-L-alanine amidase activity [GO:0009392]; N-acetylmuramoyl-L-alanine amidase activity [GO:0008745]; cell wall organization [GO:0071555]; peptidoglycan catabolic process [GO:0009253]; peptidoglycan turnover [GO:0009254]	metal ion binding [GO:0046872]; N-acetyl-anhydromuramoyl-L-alanine amidase activity [GO:0009392]; N-acetylmuramoyl-L-alanine amidase activity [GO:0008745]	SUBCELLULAR LOCATION: Cytoplasm {ECO:0000305|PubMed:19309146}.
AMPE_ECOLI	P0AE14	Protein AmpE	ampE	3	3	-0.0226706	0.112862	response to antibiotic [GO:0046677]	integral component of plasma membrane [GO:0005887]; plasma membrane [GO:0005886]	integral component of plasma membrane [GO:0005887]; plasma membrane [GO:0005886]; response to antibiotic [GO:0046677]		SUBCELLULAR LOCATION: Cell inner membrane; Multi-pass membrane protein.
AMPH_ECOLI	P0AD70	D-alanyl-D-alanine-carboxypeptidase/endopeptidase AmpH (EC 3.4.-.-) (DD-alanine-endopeptidase) (DD-carboxypeptidase) (Penicillin-binding protein AmpH)	ampH	5	13	0.0116275	-1.21163	cell wall organization [GO:0071555]; peptidoglycan catabolic process [GO:0009253]; regulation of cell shape [GO:0008360]	plasma membrane [GO:0005886]	plasma membrane [GO:0005886]; carboxypeptidase activity [GO:0004180]; endopeptidase activity [GO:0004175]; penicillin binding [GO:0008658]; cell wall organization [GO:0071555]; peptidoglycan catabolic process [GO:0009253]; regulation of cell shape [GO:0008360]	carboxypeptidase activity [GO:0004180]; endopeptidase activity [GO:0004175]; penicillin binding [GO:0008658]	SUBCELLULAR LOCATION: Cell inner membrane {ECO:0000269|PubMed:22001512}.
AMPN_ECOLI	P04825	Aminopeptidase N (EC 3.4.11.2) (Alpha-aminoacylpeptide hydrolase)	pepN	139	127	0.0214688	-0.222067	proteolysis [GO:0006508]	plasma membrane [GO:0005886]	plasma membrane [GO:0005886]; aminopeptidase activity [GO:0004177]; identical protein binding [GO:0042802]; metallopeptidase activity [GO:0008237]; zinc ion binding [GO:0008270]; proteolysis [GO:0006508]	aminopeptidase activity [GO:0004177]; identical protein binding [GO:0042802]; metallopeptidase activity [GO:0008237]; zinc ion binding [GO:0008270]	SUBCELLULAR LOCATION: Cell inner membrane; Peripheral membrane protein; Cytoplasmic side.
AMPP_ECOLI	P15034	Xaa-Pro aminopeptidase (EC 3.4.11.9) (Aminoacylproline aminopeptidase) (Aminopeptidase P II) (APP-II) (X-Pro aminopeptidase)	pepP	55	53	-0.0880315	0.48088	protein homotetramerization [GO:0051289]	cytosol [GO:0005829]	cytosol [GO:0005829]; aminopeptidase activity [GO:0004177]; identical protein binding [GO:0042802]; manganese ion binding [GO:0030145]; metalloaminopeptidase activity [GO:0070006]; metalloexopeptidase activity [GO:0008235]; peptidase activity [GO:0008233]; protein homotetramerization [GO:0051289]	aminopeptidase activity [GO:0004177]; identical protein binding [GO:0042802]; manganese ion binding [GO:0030145]; metalloaminopeptidase activity [GO:0070006]; metalloexopeptidase activity [GO:0008235]; peptidase activity [GO:0008233]	SUBCELLULAR LOCATION: Cytoplasm.
AMY2_ECOLI	P26612	Cytoplasmic alpha-amylase (EC 3.2.1.1) (1,4-alpha-D-glucan glucanohydrolase)	amyA	20	28	-0.191042	-0.43077	carbohydrate metabolic process [GO:0005975]	cytoplasm [GO:0005737]	cytoplasm [GO:0005737]; alpha-amylase activity [GO:0004556]; alpha-amylase activity (releasing maltohexaose) [GO:0103025]; calcium ion binding [GO:0005509]; carbohydrate metabolic process [GO:0005975]	alpha-amylase activity [GO:0004556]; alpha-amylase activity (releasing maltohexaose) [GO:0103025]; calcium ion binding [GO:0005509]	SUBCELLULAR LOCATION: Cytoplasm {ECO:0000269|PubMed:1400215}.
ANMK_ECOLI	P77570	Anhydro-N-acetylmuramic acid kinase (EC 2.7.1.170) (AnhMurNAc kinase)	anmK	8	9	-0.0500849	-0.026048	1,6-anhydro-N-acetyl-beta-muramic acid catabolic process [GO:0097175]; amino sugar metabolic process [GO:0006040]; carbohydrate metabolic process [GO:0005975]; peptidoglycan turnover [GO:0009254]		ATP binding [GO:0005524]; kinase activity [GO:0016301]; phosphotransferase activity, alcohol group as acceptor [GO:0016773]; 1,6-anhydro-N-acetyl-beta-muramic acid catabolic process [GO:0097175]; amino sugar metabolic process [GO:0006040]; carbohydrate metabolic process [GO:0005975]; peptidoglycan turnover [GO:0009254]	ATP binding [GO:0005524]; kinase activity [GO:0016301]; phosphotransferase activity, alcohol group as acceptor [GO:0016773]
ANSP_ECOLI	P77610	L-asparagine permease (L-asparagine transport protein)	ansP	1	1	0.290827	-0.434186	amino acid transport [GO:0006865]; transmembrane transport [GO:0055085]	integral component of membrane [GO:0016021]; plasma membrane [GO:0005886]	integral component of membrane [GO:0016021]; plasma membrane [GO:0005886]; amino acid transport [GO:0006865]; transmembrane transport [GO:0055085]		SUBCELLULAR LOCATION: Cell inner membrane {ECO:0000269|PubMed:15919996}; Multi-pass membrane protein {ECO:0000269|PubMed:15919996}.
APAG_ECOLI	P62672	Protein ApaG	apaG	2	3	-0.0292972	-0.475003	error-free translesion synthesis [GO:0070987]		error-free translesion synthesis [GO:0070987]
APAH_ECOLI	P05637	Bis(5'-nucleosyl)-tetraphosphatase [symmetrical] (EC 3.6.1.41) (Ap4A hydrolase) (Diadenosine 5',5'''-P1,P4-tetraphosphate pyrophosphohydrolase) (Diadenosine tetraphosphatase)	apaH	10	10	0.00125923	0.024946	nucleobase-containing small molecule interconversion [GO:0015949]; response to X-ray [GO:0010165]; RNA decapping [GO:0110154]		bis(5'-nucleosyl)-tetraphosphatase (symmetrical) activity [GO:0008803]; bis(5'-nucleosyl)-tetraphosphatase activity [GO:0008796]; nucleobase-containing small molecule interconversion [GO:0015949]; response to X-ray [GO:0010165]; RNA decapping [GO:0110154]	bis(5'-nucleosyl)-tetraphosphatase (symmetrical) activity [GO:0008803]; bis(5'-nucleosyl)-tetraphosphatase activity [GO:0008796]
APBC_ECOLI	P0AF08	Iron-sulfur cluster carrier protein	mrp	41	45	0.0380245	0.28524	iron-sulfur cluster assembly [GO:0016226]	cytosol [GO:0005829]	cytosol [GO:0005829]; 4 iron, 4 sulfur cluster binding [GO:0051539]; ATP binding [GO:0005524]; hydrolase activity [GO:0016787]; metal ion binding [GO:0046872]; iron-sulfur cluster assembly [GO:0016226]	4 iron, 4 sulfur cluster binding [GO:0051539]; ATP binding [GO:0005524]; hydrolase activity [GO:0016787]; metal ion binding [GO:0046872]
APBE_ECOLI	P0AB85	FAD:protein FMN transferase (EC 2.7.1.180) (Flavin transferase)	apbE	1	3	-0.0438497	-0.50773	protein flavinylation [GO:0017013]	intrinsic component of periplasmic side of plasma membrane [GO:0031237]; outer membrane-bounded periplasmic space [GO:0030288]	intrinsic component of periplasmic side of plasma membrane [GO:0031237]; outer membrane-bounded periplasmic space [GO:0030288]; FAD binding [GO:0071949]; metal ion binding [GO:0046872]; transferase activity [GO:0016740]; protein flavinylation [GO:0017013]	FAD binding [GO:0071949]; metal ion binding [GO:0046872]; transferase activity [GO:0016740]	SUBCELLULAR LOCATION: Cell inner membrane {ECO:0000250|UniProtKB:P41780, ECO:0000255|PROSITE-ProRule:PRU00303}; Lipid-anchor {ECO:0000250|UniProtKB:P41780, ECO:0000255|PROSITE-ProRule:PRU00303}; Periplasmic side {ECO:0000250|UniProtKB:P41780}.
APHA_ECOLI	P0AE22	Class B acid phosphatase (CBAP) (EC 3.1.3.2)	aphA	24	18	0.048765	-0.796353		outer membrane-bounded periplasmic space [GO:0030288]	outer membrane-bounded periplasmic space [GO:0030288]; acid phosphatase activity [GO:0003993]; identical protein binding [GO:0042802]; magnesium ion binding [GO:0000287]; phosphoserine phosphatase activity [GO:0004647]	acid phosphatase activity [GO:0003993]; identical protein binding [GO:0042802]; magnesium ion binding [GO:0000287]; phosphoserine phosphatase activity [GO:0004647]	SUBCELLULAR LOCATION: Periplasm {ECO:0000269|PubMed:9011040}.
APPY_ECOLI	P05052	HTH-type transcriptional regulator AppY (M5 polypeptide)	appY	5	5	-0.0965922	0.642761	cellular response to phosphate starvation [GO:0016036]; positive regulation of transcription, DNA-templated [GO:0045893]; response to X-ray [GO:0010165]		DNA-binding transcription factor activity [GO:0003700]; sequence-specific DNA binding [GO:0043565]; cellular response to phosphate starvation [GO:0016036]; positive regulation of transcription, DNA-templated [GO:0045893]; response to X-ray [GO:0010165]	DNA-binding transcription factor activity [GO:0003700]; sequence-specific DNA binding [GO:0043565]
APT_ECOLI	P69503	Adenine phosphoribosyltransferase (APRT) (EC 2.4.2.7)	apt	36	32	0.036332	0.0402635	adenine salvage [GO:0006168]; AMP salvage [GO:0044209]; purine ribonucleoside salvage [GO:0006166]	cytosol [GO:0005829]	cytosol [GO:0005829]; adenine phosphoribosyltransferase activity [GO:0003999]; magnesium ion binding [GO:0000287]; adenine salvage [GO:0006168]; AMP salvage [GO:0044209]; purine ribonucleoside salvage [GO:0006166]	adenine phosphoribosyltransferase activity [GO:0003999]; magnesium ion binding [GO:0000287]	SUBCELLULAR LOCATION: Cytoplasm.
ARAC_ECOLI	P0A9E0	Arabinose operon regulatory protein (HTH-type transcriptional regulator AraC)	araC	3	4	0.473203	-0.261811	arabinose catabolic process [GO:0019568]	cytosol [GO:0005829]; protein-DNA complex [GO:0032993]	cytosol [GO:0005829]; protein-DNA complex [GO:0032993]; DNA-binding transcription repressor activity [GO:0001217]; identical protein binding [GO:0042802]; transcription cis-regulatory region binding [GO:0000976]; arabinose catabolic process [GO:0019568]	DNA-binding transcription repressor activity [GO:0001217]; identical protein binding [GO:0042802]; transcription cis-regulatory region binding [GO:0000976]	SUBCELLULAR LOCATION: Cytoplasm {ECO:0000305}.
ARAF_ECOLI	P02924	L-arabinose-binding periplasmic protein (ABP)	araF	3	1	-0.0708303	-0.0850625	L-arabinose transmembrane transport [GO:0042882]	outer membrane-bounded periplasmic space [GO:0030288]	outer membrane-bounded periplasmic space [GO:0030288]; ABC-type monosaccharide transporter activity [GO:0015407]; carbohydrate binding [GO:0030246]; monosaccharide binding [GO:0048029]; L-arabinose transmembrane transport [GO:0042882]	ABC-type monosaccharide transporter activity [GO:0015407]; carbohydrate binding [GO:0030246]; monosaccharide binding [GO:0048029]	SUBCELLULAR LOCATION: Periplasm.
ARCA_ECOLI	P0A9Q1	Aerobic respiration control protein ArcA (Dye resistance protein)	arcA	70	65	0.0179111	0.30403	negative regulation of transcription, DNA-templated [GO:0045892]; phosphorelay signal transduction system [GO:0000160]; positive regulation of transcription, DNA-templated [GO:0045893]; regulation of transcription, DNA-templated [GO:0006355]	cytosol [GO:0005829]; protein-DNA complex [GO:0032993]	cytosol [GO:0005829]; protein-DNA complex [GO:0032993]; DNA-binding transcription activator activity [GO:0001216]; DNA-binding transcription factor activity [GO:0003700]; DNA-binding transcription repressor activity [GO:0001217]; identical protein binding [GO:0042802]; phosphorelay response regulator activity [GO:0000156]; transcription cis-regulatory region binding [GO:0000976]; negative regulat…	DNA-binding transcription activator activity [GO:0001216]; DNA-binding transcription factor activity [GO:0003700]; DNA-binding transcription repressor activity [GO:0001217]; identical protein binding [GO:0042802]; phosphorelay response regulator activity [GO:0000156]; transcription cis-regulatory region binding [GO:0000976]	SUBCELLULAR LOCATION: Cytoplasm {ECO:0000305}.
ARCB_ECOLI	P0AEC3	Aerobic respiration control sensor protein ArcB (EC 2.7.13.3)	arcB	26	39	-0.0159823	-0.401965	peptidyl-histidine phosphorylation [GO:0018106]; protein autophosphorylation [GO:0046777]; regulation of transcription, DNA-templated [GO:0006355]; response to oxygen levels [GO:0070482]	cytosol [GO:0005829]; integral component of plasma membrane [GO:0005887]; plasma membrane [GO:0005886]	cytosol [GO:0005829]; integral component of plasma membrane [GO:0005887]; plasma membrane [GO:0005886]; ATP binding [GO:0005524]; phosphoprotein phosphatase activity [GO:0004721]; phosphorelay sensor kinase activity [GO:0000155]; peptidyl-histidine phosphorylation [GO:0018106]; protein autophosphorylation [GO:0046777]; regulation of transcription, DNA-templated [GO:0006355]; response to oxygen le…	ATP binding [GO:0005524]; phosphoprotein phosphatase activity [GO:0004721]; phosphorelay sensor kinase activity [GO:0000155]	SUBCELLULAR LOCATION: Cell inner membrane {ECO:0000269|PubMed:15919996}; Multi-pass membrane protein {ECO:0000269|PubMed:15919996}.
ARGB_ECOLI	P0A6C8	Acetylglutamate kinase (EC 2.7.2.8) (N-acetyl-L-glutamate 5-phosphotransferase) (NAG kinase) (NAGK)	argB	10	10	0.0194593	-0.391857	arginine biosynthetic process [GO:0006526]; arginine biosynthetic process via ornithine [GO:0042450]; cellular response to DNA damage stimulus [GO:0006974]	cytoplasm [GO:0005737]	cytoplasm [GO:0005737]; acetylglutamate kinase activity [GO:0003991]; arginine binding [GO:0034618]; ATP binding [GO:0005524]; arginine biosynthetic process [GO:0006526]; arginine biosynthetic process via ornithine [GO:0042450]; cellular response to DNA damage stimulus [GO:0006974]	acetylglutamate kinase activity [GO:0003991]; arginine binding [GO:0034618]; ATP binding [GO:0005524]	SUBCELLULAR LOCATION: Cytoplasm {ECO:0000255|HAMAP-Rule:MF_00082}.
ARGC_ECOLI	P11446	N-acetyl-gamma-glutamyl-phosphate reductase (AGPR) (EC 1.2.1.38) (N-acetyl-glutamate semialdehyde dehydrogenase) (NAGSA dehydrogenase)	argC	1	2	0.0395148	-0.472633	arginine biosynthetic process [GO:0006526]	cytoplasm [GO:0005737]	cytoplasm [GO:0005737]; N-acetyl-gamma-glutamyl-phosphate reductase activity [GO:0003942]; NAD binding [GO:0051287]; protein dimerization activity [GO:0046983]; arginine biosynthetic process [GO:0006526]	N-acetyl-gamma-glutamyl-phosphate reductase activity [GO:0003942]; NAD binding [GO:0051287]; protein dimerization activity [GO:0046983]	SUBCELLULAR LOCATION: Cytoplasm {ECO:0000255|HAMAP-Rule:MF_00150}.
ARGD_ECOLI	P18335	Acetylornithine/succinyldiaminopimelate aminotransferase (ACOAT) (DapATase) (Succinyldiaminopimelate transferase) (EC 2.6.1.11) (EC 2.6.1.17)	argD	18	30	0.0560131	-0.265615	arginine biosynthetic process via ornithine [GO:0042450]; lysine biosynthetic process via diaminopimelate and N-succinyl-2-amino-6-ketopimelate [GO:0033359]	cytoplasm [GO:0005737]	cytoplasm [GO:0005737]; identical protein binding [GO:0042802]; N2-acetyl-L-ornithine:2-oxoglutarate 5-aminotransferase activity [GO:0003992]; pyridoxal phosphate binding [GO:0030170]; succinyldiaminopimelate transaminase activity [GO:0009016]; arginine biosynthetic process via ornithine [GO:0042450]; lysine biosynthetic process via diaminopimelate and N-succinyl-2-amino-6-ketopimelate [GO:003335…	identical protein binding [GO:0042802]; N2-acetyl-L-ornithine:2-oxoglutarate 5-aminotransferase activity [GO:0003992]; pyridoxal phosphate binding [GO:0030170]; succinyldiaminopimelate transaminase activity [GO:0009016]	SUBCELLULAR LOCATION: Cytoplasm {ECO:0000255|HAMAP-Rule:MF_01107, ECO:0000305}.
ARGE_ECOLI	P23908	Acetylornithine deacetylase (AO) (Acetylornithinase) (EC 3.5.1.16) (N-acetylornithinase) (NAO)	argE	17	18	-0.0169454	0.353814	arginine biosynthetic process [GO:0006526]	cytoplasm [GO:0005737]	cytoplasm [GO:0005737]; acetylornithine deacetylase activity [GO:0008777]; cobalt ion binding [GO:0050897]; zinc ion binding [GO:0008270]; arginine biosynthetic process [GO:0006526]	acetylornithine deacetylase activity [GO:0008777]; cobalt ion binding [GO:0050897]; zinc ion binding [GO:0008270]	SUBCELLULAR LOCATION: Cytoplasm {ECO:0000305}.
ARGP_ECOLI	P0A8S1	HTH-type transcriptional regulator ArgP (Inhibitor of chromosome initiation) (OriC replication inhibitor)	argP	25	17	-0.0434763	-0.296518	negative regulation of DNA-dependent DNA replication initiation [GO:0032297]; negative regulation of transcription, DNA-templated [GO:0045892]; positive regulation of transcription, DNA-templated [GO:0045893]; regulation of transcription, DNA-templated [GO:0006355]		bent DNA binding [GO:0003681]; DNA-binding transcription factor activity [GO:0003700]; sequence-specific DNA binding [GO:0043565]; negative regulation of DNA-dependent DNA replication initiation [GO:0032297]; negative regulation of transcription, DNA-templated [GO:0045892]; positive regulation of transcription, DNA-templated [GO:0045893]; regulation of transcription, DNA-templated [GO:0006355]	bent DNA binding [GO:0003681]; DNA-binding transcription factor activity [GO:0003700]; sequence-specific DNA binding [GO:0043565]
ARGR_ECOLI	P0A6D0	Arginine repressor	argR	21	20	-0.0211439	-0.340999	arginine biosynthetic process [GO:0006526]; negative regulation of DNA-templated transcription, initiation [GO:2000143]; plasmid recombination [GO:0042150]; positive regulation of DNA-templated transcription, initiation [GO:2000144]; protein complex oligomerization [GO:0051259]; regulation of arginine biosynthetic process [GO:1900079]; regulation of arginine catabolic process [GO:1900081]	cytoplasm [GO:0005737]; transcription regulator complex [GO:0005667]	cytoplasm [GO:0005737]; transcription regulator complex [GO:0005667]; arginine binding [GO:0034618]; bacterial-type cis-regulatory region sequence-specific DNA binding [GO:0000986]; DNA-binding transcription factor activity [GO:0003700]; identical protein binding [GO:0042802]; arginine biosynthetic process [GO:0006526]; negative regulation of DNA-templated transcription, initiation [GO:2000143]; …	arginine binding [GO:0034618]; bacterial-type cis-regulatory region sequence-specific DNA binding [GO:0000986]; DNA-binding transcription factor activity [GO:0003700]; identical protein binding [GO:0042802]	SUBCELLULAR LOCATION: Cytoplasm.
ARGT_ECOLI	P09551	Lysine/arginine/ornithine-binding periplasmic protein (LAO-binding protein)	argT	71	70	0.0854668	-0.501154	cellular response to nitrogen starvation [GO:0006995]; cellular response to starvation [GO:0009267]; cellular response to zinc ion [GO:0071294]; L-lysine transport [GO:1902022]; ornithine transport [GO:0015822]	outer membrane-bounded periplasmic space [GO:0030288]	outer membrane-bounded periplasmic space [GO:0030288]; cellular response to nitrogen starvation [GO:0006995]; cellular response to starvation [GO:0009267]; cellular response to zinc ion [GO:0071294]; L-lysine transport [GO:1902022]; ornithine transport [GO:0015822]		SUBCELLULAR LOCATION: Periplasm.
ARLY_ECOLI	P11447	Argininosuccinate lyase (ASAL) (EC 4.3.2.1) (Arginosuccinase)	argH	16	11	-0.0343391	-0.275531	arginine biosynthetic process via ornithine [GO:0042450]	cytosol [GO:0005829]	cytosol [GO:0005829]; argininosuccinate lyase activity [GO:0004056]; arginine biosynthetic process via ornithine [GO:0042450]	argininosuccinate lyase activity [GO:0004056]	SUBCELLULAR LOCATION: Cytoplasm {ECO:0000305}.
ARNA_ECOLI	P77398	Bifunctional polymyxin resistance protein ArnA (Polymyxin resistance protein PmrI) [Includes: UDP-4-amino-4-deoxy-L-arabinose formyltransferase (EC 2.1.2.13) (ArnAFT) (UDP-L-Ara4N formyltransferase); UDP-glucuronic acid oxidase, UDP-4-keto-hexauronic acid decarboxylating (EC 1.1.1.305) (ArnADH) (UDP-GlcUA decarboxylase) (UDP-glucuronic acid dehydrogenase)]	arnA	2	1	-0.115592	-0.25345	lipid A biosynthetic process [GO:0009245]; lipopolysaccharide biosynthetic process [GO:0009103]; response to antibiotic [GO:0046677]; UDP-4-deoxy-4-formamido-beta-L-arabinopyranose biosynthetic process [GO:2001315]; UDP-D-xylose biosynthetic process [GO:0033320]	protein-containing complex [GO:0032991]	protein-containing complex [GO:0032991]; identical protein binding [GO:0042802]; NAD+ binding [GO:0070403]; UDP-4-amino-4-deoxy-L-arabinose formyltransferase activity [GO:0099619]; UDP-glucuronate decarboxylase activity [GO:0048040]; UDP-glucuronic acid dehydrogenase activity [GO:0099618]; lipid A biosynthetic process [GO:0009245]; lipopolysaccharide biosynthetic process [GO:0009103]; response to…	identical protein binding [GO:0042802]; NAD+ binding [GO:0070403]; UDP-4-amino-4-deoxy-L-arabinose formyltransferase activity [GO:0099619]; UDP-glucuronate decarboxylase activity [GO:0048040]; UDP-glucuronic acid dehydrogenase activity [GO:0099618]
ARNB_ECOLI	P77690	UDP-4-amino-4-deoxy-L-arabinose--oxoglutarate aminotransferase (EC 2.6.1.87) (Polymyxin resistance protein PmrH) (UDP-(beta-L-threo-pentapyranosyl-4''-ulose diphosphate) aminotransferase) (UDP-Ara4O aminotransferase) (UDP-4-amino-4-deoxy-L-arabinose aminotransferase)	arnB	1	1	-0.0253863	-0.565928	lipid A biosynthetic process [GO:0009245]; lipopolysaccharide biosynthetic process [GO:0009103]; polysaccharide biosynthetic process [GO:0000271]; response to antibiotic [GO:0046677]	cytoplasm [GO:0005737]	cytoplasm [GO:0005737]; pyridoxal phosphate binding [GO:0030170]; transaminase activity [GO:0008483]; UDP-4-amino-4-deoxy-L-arabinose aminotransferase [GO:0099620]; lipid A biosynthetic process [GO:0009245]; lipopolysaccharide biosynthetic process [GO:0009103]; polysaccharide biosynthetic process [GO:0000271]; response to antibiotic [GO:0046677]	pyridoxal phosphate binding [GO:0030170]; transaminase activity [GO:0008483]; UDP-4-amino-4-deoxy-L-arabinose aminotransferase [GO:0099620]
AROA_ECOLI	P0A6D3	3-phosphoshikimate 1-carboxyvinyltransferase (EC 2.5.1.19) (5-enolpyruvylshikimate-3-phosphate synthase) (EPSP synthase) (EPSPS)	aroA	39	41	0.0276416	0.343462	aromatic amino acid family biosynthetic process [GO:0009073]; cellular amino acid biosynthetic process [GO:0008652]; chorismate biosynthetic process [GO:0009423]	cytosol [GO:0005829]	cytosol [GO:0005829]; 3-phosphoshikimate 1-carboxyvinyltransferase activity [GO:0003866]; aromatic amino acid family biosynthetic process [GO:0009073]; cellular amino acid biosynthetic process [GO:0008652]; chorismate biosynthetic process [GO:0009423]	3-phosphoshikimate 1-carboxyvinyltransferase activity [GO:0003866]	SUBCELLULAR LOCATION: Cytoplasm {ECO:0000255|HAMAP-Rule:MF_00210, ECO:0000305}.
AROB_ECOLI	P07639	3-dehydroquinate synthase (DHQS) (EC 4.2.3.4)	aroB	50	44	0.00663229	-0.219366	aromatic amino acid family biosynthetic process [GO:0009073]; cellular amino acid biosynthetic process [GO:0008652]; chorismate biosynthetic process [GO:0009423]	cytoplasm [GO:0005737]	cytoplasm [GO:0005737]; 3-dehydroquinate synthase activity [GO:0003856]; NAD+ binding [GO:0070403]; zinc ion binding [GO:0008270]; aromatic amino acid family biosynthetic process [GO:0009073]; cellular amino acid biosynthetic process [GO:0008652]; chorismate biosynthetic process [GO:0009423]	3-dehydroquinate synthase activity [GO:0003856]; NAD+ binding [GO:0070403]; zinc ion binding [GO:0008270]	SUBCELLULAR LOCATION: Cytoplasm {ECO:0000255|HAMAP-Rule:MF_00110}.
AROC_ECOLI	P12008	Chorismate synthase (CS) (EC 4.2.3.5) (5-enolpyruvylshikimate-3-phosphate phospholyase) (EPSP phospholyase)	aroC	17	24	-0.176914	-0.203255	aromatic amino acid family biosynthetic process [GO:0009073]; cellular amino acid biosynthetic process [GO:0008652]; chorismate biosynthetic process [GO:0009423]	cytosol [GO:0005829]	cytosol [GO:0005829]; chorismate synthase activity [GO:0004107]; FMN binding [GO:0010181]; identical protein binding [GO:0042802]; aromatic amino acid family biosynthetic process [GO:0009073]; cellular amino acid biosynthetic process [GO:0008652]; chorismate biosynthetic process [GO:0009423]	chorismate synthase activity [GO:0004107]; FMN binding [GO:0010181]; identical protein binding [GO:0042802]
AROD_ECOLI	P05194	3-dehydroquinate dehydratase (3-dehydroquinase) (EC 4.2.1.10) (Type I DHQase) (Type I dehydroquinase) (DHQ1)	aroD	27	27	-0.0357991	0.290191	3,4-dihydroxybenzoate biosynthetic process [GO:0046279]; aromatic amino acid family biosynthetic process [GO:0009073]; cellular amino acid biosynthetic process [GO:0008652]; chorismate biosynthetic process [GO:0009423]	cytosol [GO:0005829]	cytosol [GO:0005829]; 3-dehydroquinate dehydratase activity [GO:0003855]; 3,4-dihydroxybenzoate biosynthetic process [GO:0046279]; aromatic amino acid family biosynthetic process [GO:0009073]; cellular amino acid biosynthetic process [GO:0008652]; chorismate biosynthetic process [GO:0009423]	3-dehydroquinate dehydratase activity [GO:0003855]
AROE_ECOLI	P15770	Shikimate dehydrogenase (NADP(+)) (SD) (SDH) (EC 1.1.1.25)	aroE	11	11	-0.205749	-0.807061	aromatic amino acid family biosynthetic process [GO:0009073]; cellular amino acid biosynthetic process [GO:0008652]; chorismate biosynthetic process [GO:0009423]; shikimate metabolic process [GO:0019632]	cytosol [GO:0005829]	cytosol [GO:0005829]; NADP binding [GO:0050661]; nucleotide binding [GO:0000166]; shikimate 3-dehydrogenase (NADP+) activity [GO:0004764]; aromatic amino acid family biosynthetic process [GO:0009073]; cellular amino acid biosynthetic process [GO:0008652]; chorismate biosynthetic process [GO:0009423]; shikimate metabolic process [GO:0019632]	NADP binding [GO:0050661]; nucleotide binding [GO:0000166]; shikimate 3-dehydrogenase (NADP+) activity [GO:0004764]
AROF_ECOLI	P00888	Phospho-2-dehydro-3-deoxyheptonate aldolase, Tyr-sensitive (EC 2.5.1.54) (3-deoxy-D-arabino-heptulosonate 7-phosphate synthase) (DAHP synthase) (Phospho-2-keto-3-deoxyheptonate aldolase)	aroF	9	14	0.335013	0.73787	aromatic amino acid family biosynthetic process [GO:0009073]; cellular amino acid biosynthetic process [GO:0008652]; chorismate biosynthetic process [GO:0009423]	cytoplasm [GO:0005737]	cytoplasm [GO:0005737]; 3-deoxy-7-phosphoheptulonate synthase activity [GO:0003849]; identical protein binding [GO:0042802]; aromatic amino acid family biosynthetic process [GO:0009073]; cellular amino acid biosynthetic process [GO:0008652]; chorismate biosynthetic process [GO:0009423]	3-deoxy-7-phosphoheptulonate synthase activity [GO:0003849]; identical protein binding [GO:0042802]
AROG_ECOLI	P0AB91	Phospho-2-dehydro-3-deoxyheptonate aldolase, Phe-sensitive (EC 2.5.1.54) (3-deoxy-D-arabino-heptulosonate 7-phosphate synthase) (DAHP synthase) (Phospho-2-keto-3-deoxyheptonate aldolase)	aroG	54	50	0.156612	-0.124044	aromatic amino acid family biosynthetic process [GO:0009073]; cellular amino acid biosynthetic process [GO:0008652]; chorismate biosynthetic process [GO:0009423]	cytoplasm [GO:0005737]; cytosol [GO:0005829]	cytoplasm [GO:0005737]; cytosol [GO:0005829]; 3-deoxy-7-phosphoheptulonate synthase activity [GO:0003849]; identical protein binding [GO:0042802]; aromatic amino acid family biosynthetic process [GO:0009073]; cellular amino acid biosynthetic process [GO:0008652]; chorismate biosynthetic process [GO:0009423]	3-deoxy-7-phosphoheptulonate synthase activity [GO:0003849]; identical protein binding [GO:0042802]
AROH_ECOLI	P00887	Phospho-2-dehydro-3-deoxyheptonate aldolase, Trp-sensitive (EC 2.5.1.54) (3-deoxy-D-arabino-heptulosonate 7-phosphate synthase) (DAHP synthase) (Phospho-2-keto-3-deoxyheptonate aldolase)	aroH	50	49	0.041379	0.140348	aromatic amino acid family biosynthetic process [GO:0009073]; cellular amino acid biosynthetic process [GO:0008652]; chorismate biosynthetic process [GO:0009423]	cytoplasm [GO:0005737]	cytoplasm [GO:0005737]; 3-deoxy-7-phosphoheptulonate synthase activity [GO:0003849]; identical protein binding [GO:0042802]; aromatic amino acid family biosynthetic process [GO:0009073]; cellular amino acid biosynthetic process [GO:0008652]; chorismate biosynthetic process [GO:0009423]	3-deoxy-7-phosphoheptulonate synthase activity [GO:0003849]; identical protein binding [GO:0042802]
AROK_ECOLI	P0A6D7	Shikimate kinase 1 (SK 1) (EC 2.7.1.71) (Shikimate kinase I) (SKI)	aroK	56	37	0.0484999	-0.168647	aromatic amino acid family biosynthetic process [GO:0009073]; cellular amino acid biosynthetic process [GO:0008652]; chorismate biosynthetic process [GO:0009423]; response to antibiotic [GO:0046677]	cytosol [GO:0005829]	cytosol [GO:0005829]; ATP binding [GO:0005524]; magnesium ion binding [GO:0000287]; shikimate kinase activity [GO:0004765]; aromatic amino acid family biosynthetic process [GO:0009073]; cellular amino acid biosynthetic process [GO:0008652]; chorismate biosynthetic process [GO:0009423]; response to antibiotic [GO:0046677]	ATP binding [GO:0005524]; magnesium ion binding [GO:0000287]; shikimate kinase activity [GO:0004765]	SUBCELLULAR LOCATION: Cytoplasm {ECO:0000305}.
AROL_ECOLI	P0A6E1	Shikimate kinase 2 (SK 2) (EC 2.7.1.71) (Shikimate kinase II) (SKII)	aroL	11	10	0.171413	0.344098	aromatic amino acid family biosynthetic process [GO:0009073]; cellular amino acid biosynthetic process [GO:0008652]; chorismate biosynthetic process [GO:0009423]	cytosol [GO:0005829]	cytosol [GO:0005829]; ATP binding [GO:0005524]; magnesium ion binding [GO:0000287]; metal ion binding [GO:0046872]; shikimate kinase activity [GO:0004765]; aromatic amino acid family biosynthetic process [GO:0009073]; cellular amino acid biosynthetic process [GO:0008652]; chorismate biosynthetic process [GO:0009423]	ATP binding [GO:0005524]; magnesium ion binding [GO:0000287]; metal ion binding [GO:0046872]; shikimate kinase activity [GO:0004765]	SUBCELLULAR LOCATION: Cytoplasm {ECO:0000250}.
AROM_ECOLI	P0AE28	Protein AroM	aroM	2	5	-0.170248	0.222845
AROP_ECOLI	P15993	Aromatic amino acid transport protein AroP (General aromatic amino acid permease)	aroP	1	2	0.182089	0.0410292	phenylalanine transport [GO:0015823]; tryptophan transport [GO:0015827]; tyrosine transport [GO:0015828]	integral component of plasma membrane [GO:0005887]; plasma membrane [GO:0005886]	integral component of plasma membrane [GO:0005887]; plasma membrane [GO:0005886]; L-phenylalanine transmembrane transporter activity [GO:0015192]; L-tryptophan transmembrane transporter activity [GO:0015196]; L-tyrosine transmembrane transporter activity [GO:0005302]; phenylalanine transport [GO:0015823]; tryptophan transport [GO:0015827]; tyrosine transport [GO:0015828]	L-phenylalanine transmembrane transporter activity [GO:0015192]; L-tryptophan transmembrane transporter activity [GO:0015196]; L-tyrosine transmembrane transporter activity [GO:0005302]	SUBCELLULAR LOCATION: Cell inner membrane; Multi-pass membrane protein.
ARSC_ECOLI	P0AB96	Arsenate reductase (EC 1.20.4.1) (Arsenical pump modifier)	arsC	1	1	0.0344981	-0.131618	cellular response to DNA damage stimulus [GO:0006974]; response to arsenic-containing substance [GO:0046685]		arsenate reductase (glutaredoxin) activity [GO:0008794]; cellular response to DNA damage stimulus [GO:0006974]; response to arsenic-containing substance [GO:0046685]	arsenate reductase (glutaredoxin) activity [GO:0008794]
ARTI_ECOLI	P30859	Putative ABC transporter arginine-binding protein 2	artI	112	91	-0.146532	0.191055	amino acid transport [GO:0006865]	membrane [GO:0016020]; outer membrane-bounded periplasmic space [GO:0030288]; periplasmic space [GO:0042597]	membrane [GO:0016020]; outer membrane-bounded periplasmic space [GO:0030288]; periplasmic space [GO:0042597]; ligand-gated ion channel activity [GO:0015276]; amino acid transport [GO:0006865]	ligand-gated ion channel activity [GO:0015276]	SUBCELLULAR LOCATION: Periplasm {ECO:0000269|PubMed:8801422}.
ARTJ_ECOLI	P30860	ABC transporter arginine-binding protein 1	artJ	31	24	0.0137091	-0.198153	arginine transport [GO:0015809]; L-arginine import across plasma membrane [GO:0097638]	membrane [GO:0016020]; outer membrane-bounded periplasmic space [GO:0030288]; periplasmic space [GO:0042597]	membrane [GO:0016020]; outer membrane-bounded periplasmic space [GO:0030288]; periplasmic space [GO:0042597]; amino acid binding [GO:0016597]; arginine binding [GO:0034618]; ligand-gated ion channel activity [GO:0015276]; arginine transport [GO:0015809]; L-arginine import across plasma membrane [GO:0097638]	amino acid binding [GO:0016597]; arginine binding [GO:0034618]; ligand-gated ion channel activity [GO:0015276]	SUBCELLULAR LOCATION: Periplasm {ECO:0000269|PubMed:8801422}.
ARTM_ECOLI	P0AE30	Arginine ABC transporter permease protein ArtM	artM	2	2	-0.0847803	0.052561	amino acid transport [GO:0006865]; L-arginine import across plasma membrane [GO:0097638]	ATP-binding cassette (ABC) transporter complex [GO:0043190]; integral component of plasma membrane [GO:0005887]; plasma membrane [GO:0005886]	ATP-binding cassette (ABC) transporter complex [GO:0043190]; integral component of plasma membrane [GO:0005887]; plasma membrane [GO:0005886]; transmembrane transporter activity [GO:0022857]; amino acid transport [GO:0006865]; L-arginine import across plasma membrane [GO:0097638]	transmembrane transporter activity [GO:0022857]	SUBCELLULAR LOCATION: Cell inner membrane; Multi-pass membrane protein.
ARTP_ECOLI	P0AAF6	Arginine transport ATP-binding protein ArtP (EC 7.4.2.-)	artP	8	10	-0.0463503	0.0327919	L-arginine import across plasma membrane [GO:0097638]	ATP-binding cassette (ABC) transporter complex, substrate-binding subunit-containing [GO:0055052]; plasma membrane [GO:0005886]	ATP-binding cassette (ABC) transporter complex, substrate-binding subunit-containing [GO:0055052]; plasma membrane [GO:0005886]; ATP binding [GO:0005524]; ATPase-coupled polar amino acid-transporter activity [GO:0015426]; L-arginine import across plasma membrane [GO:0097638]	ATPase-coupled polar amino acid-transporter activity [GO:0015426]; ATP binding [GO:0005524]	SUBCELLULAR LOCATION: Cell inner membrane {ECO:0000305}; Peripheral membrane protein {ECO:0000305}.
ARTQ_ECOLI	P0AE34	Arginine ABC transporter permease protein ArtQ	artQ	5	6	-0.159827	-0.0330567	L-arginine import across plasma membrane [GO:0097638]	ATP-binding cassette (ABC) transporter complex [GO:0043190]; integral component of plasma membrane [GO:0005887]; plasma membrane [GO:0005886]	ATP-binding cassette (ABC) transporter complex [GO:0043190]; integral component of plasma membrane [GO:0005887]; plasma membrane [GO:0005886]; transmembrane transporter activity [GO:0022857]; L-arginine import across plasma membrane [GO:0097638]	transmembrane transporter activity [GO:0022857]	SUBCELLULAR LOCATION: Cell inner membrane; Multi-pass membrane protein.
ASCB_ECOLI	P24240	6-phospho-beta-glucosidase AscB (EC 3.2.1.86)	ascB	2	1	-0.0859897	0.861219	carbohydrate catabolic process [GO:0016052]; cellobiose catabolic process [GO:2000892]	cytosol [GO:0005829]	cytosol [GO:0005829]; 6-phospho-beta-glucosidase activity [GO:0008706]; beta-glucosidase activity [GO:0008422]; methyl beta-D-glucoside 6-phosphate glucohydrolase activity [GO:0103047]; carbohydrate catabolic process [GO:0016052]; cellobiose catabolic process [GO:2000892]	6-phospho-beta-glucosidase activity [GO:0008706]; beta-glucosidase activity [GO:0008422]; methyl beta-D-glucoside 6-phosphate glucohydrolase activity [GO:0103047]
ASCG_ECOLI	P24242	HTH-type transcriptional regulator AscG (Cryptic asc operon repressor)	ascG	4	8	-0.0278329	-0.563871	negative regulation of transcription, DNA-templated [GO:0045892]; regulation of transcription, DNA-templated [GO:0006355]; transcription, DNA-templated [GO:0006351]		DNA-binding transcription factor activity [GO:0003700]; sequence-specific DNA binding [GO:0043565]; transcription cis-regulatory region binding [GO:0000976]; negative regulation of transcription, DNA-templated [GO:0045892]; regulation of transcription, DNA-templated [GO:0006355]; transcription, DNA-templated [GO:0006351]	DNA-binding transcription factor activity [GO:0003700]; sequence-specific DNA binding [GO:0043565]; transcription cis-regulatory region binding [GO:0000976]
ASMA_ECOLI	P28249	Protein AsmA	asmA	28	34	0.0211881	-0.170708	regulation of protein targeting to membrane [GO:0090313]	periplasmic space [GO:0042597]; plasma membrane [GO:0005886]	periplasmic space [GO:0042597]; plasma membrane [GO:0005886]; regulation of protein targeting to membrane [GO:0090313]		SUBCELLULAR LOCATION: Periplasm {ECO:0000305}.
ASNA_ECOLI	P00963	Aspartate--ammonia ligase (EC 6.3.1.1) (Asparagine synthetase A)	asnA	63	52	-0.0403337	0.0870542	asparagine biosynthetic process [GO:0006529]; cellular response to DNA damage stimulus [GO:0006974]; L-asparagine biosynthetic process [GO:0070981]	cytosol [GO:0005829]	cytosol [GO:0005829]; aspartate-ammonia ligase activity [GO:0004071]; ATP binding [GO:0005524]; identical protein binding [GO:0042802]; asparagine biosynthetic process [GO:0006529]; cellular response to DNA damage stimulus [GO:0006974]; L-asparagine biosynthetic process [GO:0070981]	aspartate-ammonia ligase activity [GO:0004071]; ATP binding [GO:0005524]; identical protein binding [GO:0042802]	SUBCELLULAR LOCATION: Cytoplasm.
ASNB_ECOLI	P22106	Asparagine synthetase B [glutamine-hydrolyzing] (AS-B) (EC 6.3.5.4)	asnB	74	72	0.0230221	-0.0394774	asparagine biosynthetic process [GO:0006529]; cellular amino acid biosynthetic process [GO:0008652]; cellular amino acid catabolic process [GO:0009063]; glutamine metabolic process [GO:0006541]; L-asparagine biosynthetic process [GO:0070981]	cytoplasm [GO:0005737]; cytosol [GO:0005829]	cytoplasm [GO:0005737]; cytosol [GO:0005829]; amino acid binding [GO:0016597]; asparagine synthase (glutamine-hydrolyzing) activity [GO:0004066]; aspartate-ammonia ligase activity [GO:0004071]; ATP binding [GO:0005524]; identical protein binding [GO:0042802]; asparagine biosynthetic process [GO:0006529]; cellular amino acid biosynthetic process [GO:0008652]; cellular amino acid catabolic process …	amino acid binding [GO:0016597]; asparagine synthase (glutamine-hydrolyzing) activity [GO:0004066]; aspartate-ammonia ligase activity [GO:0004071]; ATP binding [GO:0005524]; identical protein binding [GO:0042802]
ASNC_ECOLI	P0ACI6	Regulatory protein AsnC	asnC	10	8	0.0772317	0.0639803	negative regulation of transcription, DNA-templated [GO:0045892]; positive regulation of transcription, DNA-templated [GO:0045893]; response to amino acid [GO:0043200]		amino acid binding [GO:0016597]; DNA-binding transcription factor activity [GO:0003700]; sequence-specific DNA binding [GO:0043565]; negative regulation of transcription, DNA-templated [GO:0045892]; positive regulation of transcription, DNA-templated [GO:0045893]; response to amino acid [GO:0043200]	amino acid binding [GO:0016597]; DNA-binding transcription factor activity [GO:0003700]; sequence-specific DNA binding [GO:0043565]
ASPA_ECOLI	P0AC38	Aspartate ammonia-lyase (Aspartase) (EC 4.3.1.1)	aspA	110	89	-0.0872609	-0.990663	aspartate metabolic process [GO:0006531]; tricarboxylic acid cycle [GO:0006099]	cytosol [GO:0005829]; membrane [GO:0016020]	cytosol [GO:0005829]; membrane [GO:0016020]; aspartate ammonia-lyase activity [GO:0008797]; aspartate metabolic process [GO:0006531]; tricarboxylic acid cycle [GO:0006099]	aspartate ammonia-lyase activity [GO:0008797]
ASPG1_ECOLI	P0A962	L-asparaginase 1 (EC 3.5.1.1) (L-asparaginase I) (L-ASNase I) (L-asparagine amidohydrolase I)	ansA	13	13	0.0576386	-0.184499	asparagine catabolic process via L-aspartate [GO:0033345]	cytoplasm [GO:0005737]; cytosol [GO:0005829]	cytoplasm [GO:0005737]; cytosol [GO:0005829]; asparaginase activity [GO:0004067]; identical protein binding [GO:0042802]; asparagine catabolic process via L-aspartate [GO:0033345]	asparaginase activity [GO:0004067]; identical protein binding [GO:0042802]	SUBCELLULAR LOCATION: Cytoplasm.
ASPG2_ECOLI	P00805	L-asparaginase 2 (EC 3.5.1.1) (L-asparaginase II) (L-ASNase II) (L-asparagine amidohydrolase II) (Colaspase)	ansB	9	13	-0.0154752	1.22894	asparagine catabolic process [GO:0006530]	outer membrane-bounded periplasmic space [GO:0030288]; periplasmic space [GO:0042597]; protein-containing complex [GO:0032991]	outer membrane-bounded periplasmic space [GO:0030288]; periplasmic space [GO:0042597]; protein-containing complex [GO:0032991]; asparaginase activity [GO:0004067]; identical protein binding [GO:0042802]; asparagine catabolic process [GO:0006530]	asparaginase activity [GO:0004067]; identical protein binding [GO:0042802]	SUBCELLULAR LOCATION: Periplasm.
ASSY_ECOLI	P0A6E4	Argininosuccinate synthase (EC 6.3.4.5) (Citrulline--aspartate ligase)	argG	60	38	-0.0578931	-0.397177	arginine biosynthetic process [GO:0006526]; argininosuccinate metabolic process [GO:0000053]; urea cycle [GO:0000050]	cytoplasm [GO:0005737]; cytosol [GO:0005829]	cytoplasm [GO:0005737]; cytosol [GO:0005829]; argininosuccinate synthase activity [GO:0004055]; ATP binding [GO:0005524]; identical protein binding [GO:0042802]; protein homodimerization activity [GO:0042803]; arginine biosynthetic process [GO:0006526]; argininosuccinate metabolic process [GO:0000053]; urea cycle [GO:0000050]	argininosuccinate synthase activity [GO:0004055]; ATP binding [GO:0005524]; identical protein binding [GO:0042802]; protein homodimerization activity [GO:0042803]	SUBCELLULAR LOCATION: Cytoplasm {ECO:0000305}.
ASTA_ECOLI	P0AE37	Arginine N-succinyltransferase (AST) (EC 2.3.1.109) (AOST)	astA	1	10	-0.0384678	-0.40624	arginine catabolic process to glutamate [GO:0019544]; arginine catabolic process to succinate [GO:0019545]		arginine N-succinyltransferase activity [GO:0008791]; arginine catabolic process to glutamate [GO:0019544]; arginine catabolic process to succinate [GO:0019545]	arginine N-succinyltransferase activity [GO:0008791]
ASTB_ECOLI	P76216	N-succinylarginine dihydrolase (EC 3.5.3.23)	astB	2	4	0.199747	-0.128731	arginine catabolic process [GO:0006527]; arginine catabolic process to glutamate [GO:0019544]; arginine catabolic process to succinate [GO:0019545]		N-succinylarginine dihydrolase activity [GO:0009015]; arginine catabolic process [GO:0006527]; arginine catabolic process to glutamate [GO:0019544]; arginine catabolic process to succinate [GO:0019545]	N-succinylarginine dihydrolase activity [GO:0009015]
ASTC_ECOLI	P77581	Succinylornithine transaminase (SOAT) (EC 2.6.1.81) (Carbon starvation protein C) (Succinylornithine aminotransferase)	astC	51	50	0.0846185	-0.119972	arginine biosynthetic process via ornithine [GO:0042450]; arginine catabolic process [GO:0006527]; arginine catabolic process to glutamate [GO:0019544]; arginine catabolic process to succinate [GO:0019545]; ornithine catabolic process [GO:0006593]		identical protein binding [GO:0042802]; N2-acetyl-L-ornithine:2-oxoglutarate 5-aminotransferase activity [GO:0003992]; pyridoxal phosphate binding [GO:0030170]; succinylornithine transaminase activity [GO:0043825]; arginine biosynthetic process via ornithine [GO:0042450]; arginine catabolic process [GO:0006527]; arginine catabolic process to glutamate [GO:0019544]; arginine catabolic process to s…	identical protein binding [GO:0042802]; N2-acetyl-L-ornithine:2-oxoglutarate 5-aminotransferase activity [GO:0003992]; pyridoxal phosphate binding [GO:0030170]; succinylornithine transaminase activity [GO:0043825]
ASTD_ECOLI	P76217	N-succinylglutamate 5-semialdehyde dehydrogenase (EC 1.2.1.71) (Succinylglutamic semialdehyde dehydrogenase) (SGSD)	astD	15	15	0.0833283	-0.230654	arginine catabolic process to glutamate [GO:0019544]; arginine catabolic process to succinate [GO:0019545]		aldehyde dehydrogenase (NAD+) activity [GO:0004029]; succinate-semialdehyde dehydrogenase (NAD+) activity [GO:0004777]; succinylglutamate-semialdehyde dehydrogenase activity [GO:0043824]; arginine catabolic process to glutamate [GO:0019544]; arginine catabolic process to succinate [GO:0019545]	aldehyde dehydrogenase (NAD+) activity [GO:0004029]; succinate-semialdehyde dehydrogenase (NAD+) activity [GO:0004777]; succinylglutamate-semialdehyde dehydrogenase activity [GO:0043824]
ATDA_ECOLI	P0A951	Spermidine N(1)-acetyltransferase (SAT) (EC 2.3.1.57) (Spermidine/spermine N(1)-acetyltransferase) (SSAT)	speG	12	14	-0.0314912	-0.51631	polyamine catabolic process [GO:0006598]	cytoplasm [GO:0005737]; protein-containing complex [GO:0032991]	cytoplasm [GO:0005737]; protein-containing complex [GO:0032991]; diamine N-acetyltransferase activity [GO:0004145]; identical protein binding [GO:0042802]; magnesium ion binding [GO:0000287]; polyamine catabolic process [GO:0006598]	diamine N-acetyltransferase activity [GO:0004145]; identical protein binding [GO:0042802]; magnesium ion binding [GO:0000287]	SUBCELLULAR LOCATION: Cytoplasm {ECO:0000305}.
ATL_ECOLI	P0AFP2	DNA base-flipping protein (Alkyltransferase-like protein ATL)	atl	2	4	0.0319356	-0.997526	DNA repair [GO:0006281]		catalytic activity [GO:0003824]; damaged DNA binding [GO:0003684]; enzyme binding [GO:0019899]; DNA repair [GO:0006281]	catalytic activity [GO:0003824]; damaged DNA binding [GO:0003684]; enzyme binding [GO:0019899]
ATMA_ECOLI	P0ABB8	Magnesium-transporting ATPase, P-type 1 (EC 7.2.2.14) (Mg(2+) transport ATPase, P-type 1)	mgtA	16	25	0.0683541	-0.355013	cellular response to magnesium ion [GO:0071286]; magnesium ion transmembrane transport [GO:1903830]	integral component of plasma membrane [GO:0005887]; intracellular membrane-bounded organelle [GO:0043231]; plasma membrane [GO:0005886]	integral component of plasma membrane [GO:0005887]; intracellular membrane-bounded organelle [GO:0043231]; plasma membrane [GO:0005886]; ATP binding [GO:0005524]; ATPase-coupled cation transmembrane transporter activity [GO:0019829]; metal ion binding [GO:0046872]; P-type ion transporter activity [GO:0015662]; P-type magnesium transporter activity [GO:0015444]; cellular response to magnesium ion …	ATPase-coupled cation transmembrane transporter activity [GO:0019829]; ATP binding [GO:0005524]; metal ion binding [GO:0046872]; P-type ion transporter activity [GO:0015662]; P-type magnesium transporter activity [GO:0015444]	SUBCELLULAR LOCATION: Cell inner membrane {ECO:0000269|PubMed:15919996}; Multi-pass membrane protein {ECO:0000255}.
ATOC_ECOLI	Q06065	Regulatory protein AtoC (Acetoacetate metabolism regulatory protein) (DNA-binding transcriptional regulator AtoC) (Ornithine decarboxylase antizyme)	atoC	1	6	-0.0990795	-0.421618	phosphorelay signal transduction system [GO:0000160]; positive regulation of transcription, DNA-templated [GO:0045893]; regulation of polyamine biosynthetic process [GO:0010967]	cytoplasm [GO:0005737]	cytoplasm [GO:0005737]; ATP binding [GO:0005524]; DNA-binding transcription factor activity [GO:0003700]; ornithine decarboxylase inhibitor activity [GO:0008073]; sequence-specific DNA binding [GO:0043565]; phosphorelay signal transduction system [GO:0000160]; positive regulation of transcription, DNA-templated [GO:0045893]; regulation of polyamine biosynthetic process [GO:0010967]	ATP binding [GO:0005524]; DNA-binding transcription factor activity [GO:0003700]; ornithine decarboxylase inhibitor activity [GO:0008073]; sequence-specific DNA binding [GO:0043565]	SUBCELLULAR LOCATION: Cytoplasm {ECO:0000269|PubMed:16153782}. Note=Membrane-associated in the presence of AtoS. {ECO:0000269|PubMed:16153782}.
ATP6_ECOLI	P0AB98	ATP synthase subunit a (ATP synthase F0 sector subunit a) (F-ATPase subunit 6)	atpB	20	20	-0.0750882	-0.334283	plasma membrane ATP synthesis coupled proton transport [GO:0042777]	integral component of plasma membrane [GO:0005887]; proton-transporting ATP synthase complex, coupling factor F(o) [GO:0045263]	integral component of plasma membrane [GO:0005887]; proton-transporting ATP synthase complex, coupling factor F(o) [GO:0045263]; proton-transporting ATP synthase activity, rotational mechanism [GO:0046933]; plasma membrane ATP synthesis coupled proton transport [GO:0042777]	proton-transporting ATP synthase activity, rotational mechanism [GO:0046933]	SUBCELLULAR LOCATION: Cell inner membrane {ECO:0000255|HAMAP-Rule:MF_01393, ECO:0000269|PubMed:15919996}; Multi-pass membrane protein {ECO:0000255|HAMAP-Rule:MF_01393, ECO:0000269|PubMed:15919996}.
ATPA_ECOLI	P0ABB0	ATP synthase subunit alpha (EC 7.1.2.2) (ATP synthase F1 sector subunit alpha) (F-ATPase subunit alpha)	atpA	301	228	0.0230268	-0.221136	ATP synthesis coupled proton transport [GO:0015986]	membrane [GO:0016020]; plasma membrane [GO:0005886]; proton-transporting ATP synthase complex, catalytic core F(1) [GO:0045261]	membrane [GO:0016020]; plasma membrane [GO:0005886]; proton-transporting ATP synthase complex, catalytic core F(1) [GO:0045261]; ADP binding [GO:0043531]; ATP binding [GO:0005524]; proton-transporting ATP synthase activity, rotational mechanism [GO:0046933]; proton-transporting ATPase activity, rotational mechanism [GO:0046961]; ATP synthesis coupled proton transport [GO:0015986]	ADP binding [GO:0043531]; ATP binding [GO:0005524]; proton-transporting ATPase activity, rotational mechanism [GO:0046961]; proton-transporting ATP synthase activity, rotational mechanism [GO:0046933]	SUBCELLULAR LOCATION: Cell inner membrane {ECO:0000255|HAMAP-Rule:MF_01346, ECO:0000269|PubMed:16079137}; Peripheral membrane protein {ECO:0000255|HAMAP-Rule:MF_01346, ECO:0000269|PubMed:16079137}.
ATPB_ECOLI	P0ABB4	ATP synthase subunit beta (EC 7.1.2.2) (ATP synthase F1 sector subunit beta) (F-ATPase subunit beta)	atpD	317	279	0.00481868	-0.18851		membrane [GO:0016020]; plasma membrane [GO:0005886]; proton-transporting ATP synthase complex, catalytic core F(1) [GO:0045261]	membrane [GO:0016020]; plasma membrane [GO:0005886]; proton-transporting ATP synthase complex, catalytic core F(1) [GO:0045261]; ATP binding [GO:0005524]; proton-transporting ATP synthase activity, rotational mechanism [GO:0046933]; proton-transporting ATPase activity, rotational mechanism [GO:0046961]	ATP binding [GO:0005524]; proton-transporting ATPase activity, rotational mechanism [GO:0046961]; proton-transporting ATP synthase activity, rotational mechanism [GO:0046933]	SUBCELLULAR LOCATION: Cell inner membrane; Peripheral membrane protein.
ATPD_ECOLI	P0ABA4	ATP synthase subunit delta (ATP synthase F(1) sector subunit delta) (F-type ATPase subunit delta) (F-ATPase subunit delta)	atpH	59	56	0.0381717	-0.235476	ATP synthesis coupled proton transport [GO:0015986]	plasma membrane [GO:0005886]; proton-transporting ATP synthase complex, catalytic core F(1) [GO:0045261]	plasma membrane [GO:0005886]; proton-transporting ATP synthase complex, catalytic core F(1) [GO:0045261]; proton-transporting ATP synthase activity, rotational mechanism [GO:0046933]; proton-transporting ATPase activity, rotational mechanism [GO:0046961]; ATP synthesis coupled proton transport [GO:0015986]	proton-transporting ATPase activity, rotational mechanism [GO:0046961]; proton-transporting ATP synthase activity, rotational mechanism [GO:0046933]	SUBCELLULAR LOCATION: Cell inner membrane {ECO:0000255|HAMAP-Rule:MF_01416, ECO:0000269|PubMed:16079137}; Peripheral membrane protein {ECO:0000255|HAMAP-Rule:MF_01416, ECO:0000269|PubMed:16079137}.
ATPE_ECOLI	P0A6E6	ATP synthase epsilon chain (ATP synthase F1 sector epsilon subunit) (F-ATPase epsilon subunit)	atpC	17	19	0.0878367	-0.13354	ATP synthesis coupled proton transport [GO:0015986]	plasma membrane [GO:0005886]; proton-transporting ATP synthase complex, catalytic core F(1) [GO:0045261]	plasma membrane [GO:0005886]; proton-transporting ATP synthase complex, catalytic core F(1) [GO:0045261]; ATP binding [GO:0005524]; proton-transporting ATP synthase activity, rotational mechanism [GO:0046933]; ATP synthesis coupled proton transport [GO:0015986]	ATP binding [GO:0005524]; proton-transporting ATP synthase activity, rotational mechanism [GO:0046933]	SUBCELLULAR LOCATION: Cell inner membrane {ECO:0000269|PubMed:16079137, ECO:0000269|PubMed:21778229}; Peripheral membrane protein {ECO:0000269|PubMed:16079137, ECO:0000269|PubMed:21778229}.
ATPF_ECOLI	P0ABA0	ATP synthase subunit b (ATP synthase F(0) sector subunit b) (ATPase subunit I) (F-type ATPase subunit b) (F-ATPase subunit b)	atpF	101	82	0.0313102	-0.244359		integral component of membrane [GO:0016021]; plasma membrane [GO:0005886]; proton-transporting ATP synthase complex, coupling factor F(o) [GO:0045263]	integral component of membrane [GO:0016021]; plasma membrane [GO:0005886]; proton-transporting ATP synthase complex, coupling factor F(o) [GO:0045263]; proton-transporting ATP synthase activity, rotational mechanism [GO:0046933]; proton-transporting ATPase activity, rotational mechanism [GO:0046961]	proton-transporting ATPase activity, rotational mechanism [GO:0046961]; proton-transporting ATP synthase activity, rotational mechanism [GO:0046933]	SUBCELLULAR LOCATION: Cell inner membrane {ECO:0000255|HAMAP-Rule:MF_01398}; Single-pass membrane protein {ECO:0000255|HAMAP-Rule:MF_01398}.
ATPG_ECOLI	P0ABA6	ATP synthase gamma chain (ATP synthase F1 sector gamma subunit) (F-ATPase gamma subunit)	atpG	167	156	-0.00367665	-0.241221	ATP synthesis coupled proton transport [GO:0015986]; plasma membrane ATP synthesis coupled proton transport [GO:0042777]	membrane [GO:0016020]; plasma membrane [GO:0005886]; proton-transporting ATP synthase complex, catalytic core F(1) [GO:0045261]	membrane [GO:0016020]; plasma membrane [GO:0005886]; proton-transporting ATP synthase complex, catalytic core F(1) [GO:0045261]; ATP binding [GO:0005524]; proton-transporting ATP synthase activity, rotational mechanism [GO:0046933]; proton-transporting ATPase activity, rotational mechanism [GO:0046961]; ATP synthesis coupled proton transport [GO:0015986]; plasma membrane ATP synthesis coupled pro…	ATP binding [GO:0005524]; proton-transporting ATPase activity, rotational mechanism [GO:0046961]; proton-transporting ATP synthase activity, rotational mechanism [GO:0046933]	SUBCELLULAR LOCATION: Cell inner membrane {ECO:0000269|PubMed:16079137}; Peripheral membrane protein {ECO:0000269|PubMed:16079137}.
ATPL_ECOLI	P68699	ATP synthase subunit c (ATP synthase F(0) sector subunit c) (Dicyclohexylcarbodiimide-binding protein) (F-type ATPase subunit c) (F-ATPase subunit c) (Lipid-binding protein)	atpE	8	9	0.0473446	-0.444017	ATP synthesis coupled proton transport [GO:0015986]	integral component of membrane [GO:0016021]; plasma membrane [GO:0005886]; proton-transporting ATP synthase complex, coupling factor F(o) [GO:0045263]	integral component of membrane [GO:0016021]; plasma membrane [GO:0005886]; proton-transporting ATP synthase complex, coupling factor F(o) [GO:0045263]; lipid binding [GO:0008289]; proton-transporting ATP synthase activity, rotational mechanism [GO:0046933]; proton-transporting ATPase activity, rotational mechanism [GO:0046961]; ATP synthesis coupled proton transport [GO:0015986]	lipid binding [GO:0008289]; proton-transporting ATPase activity, rotational mechanism [GO:0046961]; proton-transporting ATP synthase activity, rotational mechanism [GO:0046933]	SUBCELLULAR LOCATION: Cell inner membrane {ECO:0000269|PubMed:15919996}; Multi-pass membrane protein {ECO:0000269|PubMed:15919996}.
AVTA_ECOLI	P09053	Valine--pyruvate aminotransferase (EC 2.6.1.66) (Alanine--valine transaminase) (Transaminase C)	avtA	16	19	-0.0827713	-0.249591	alpha-amino acid metabolic process [GO:1901605]; D-alanine biosynthetic process [GO:0030632]; valine biosynthetic process [GO:0009099]	cytosol [GO:0005829]	cytosol [GO:0005829]; pyridoxal phosphate binding [GO:0030170]; transaminase activity [GO:0008483]; valine-pyruvate transaminase activity [GO:0009042]; alpha-amino acid metabolic process [GO:1901605]; D-alanine biosynthetic process [GO:0030632]; valine biosynthetic process [GO:0009099]	pyridoxal phosphate binding [GO:0030170]; transaminase activity [GO:0008483]; valine-pyruvate transaminase activity [GO:0009042]	SUBCELLULAR LOCATION: Cytoplasm {ECO:0000250}.
AZOR_ECOLI	P41407	FMN-dependent NADH:quinone oxidoreductase (EC 1.6.5.-) (Azo-dye reductase) (FMN-dependent NADH-azo compound oxidoreductase) (FMN-dependent NADH-azoreductase) (EC 1.7.1.17)	azoR	43	35	0.00672196	-0.00765306	response to oxidative stress [GO:0006979]	cytosol [GO:0005829]	cytosol [GO:0005829]; azobenzene reductase activity [GO:0050446]; electron transfer activity [GO:0009055]; FMN binding [GO:0010181]; oxidoreductase activity, acting on NAD(P)H, NAD(P) as acceptor [GO:0016652]; oxidoreductase activity, acting on NAD(P)H, quinone or similar compound as acceptor [GO:0016655]; response to oxidative stress [GO:0006979]	azobenzene reductase activity [GO:0050446]; electron transfer activity [GO:0009055]; FMN binding [GO:0010181]; oxidoreductase activity, acting on NAD(P)H, NAD(P) as acceptor [GO:0016652]; oxidoreductase activity, acting on NAD(P)H, quinone or similar compound as acceptor [GO:0016655]
BAER_ECOLI	P69228	Transcriptional regulatory protein BaeR	baeR	15	19	-0.107171	0.256492	positive regulation of DNA-templated transcription, initiation [GO:2000144]; regulation of response to drug [GO:2001023]; transcription, DNA-templated [GO:0006351]	cytosol [GO:0005829]; protein-DNA complex [GO:0032993]	cytosol [GO:0005829]; protein-DNA complex [GO:0032993]; bacterial-type cis-regulatory region sequence-specific DNA binding [GO:0000986]; DNA-binding transcription activator activity [GO:0001216]; identical protein binding [GO:0042802]; phosphorelay response regulator activity [GO:0000156]; transcription cis-regulatory region binding [GO:0000976]; positive regulation of DNA-templated transcription…	bacterial-type cis-regulatory region sequence-specific DNA binding [GO:0000986]; DNA-binding transcription activator activity [GO:0001216]; identical protein binding [GO:0042802]; phosphorelay response regulator activity [GO:0000156]; transcription cis-regulatory region binding [GO:0000976]	SUBCELLULAR LOCATION: Cytoplasm {ECO:0000305}.
BAES_ECOLI	P30847	Signal transduction histidine-protein kinase BaeS (EC 2.7.13.3)	baeS	3	5	-0.109352	-0.0739854	cellular response to cell envelope stress [GO:0036460]; protein autophosphorylation [GO:0046777]	integral component of plasma membrane [GO:0005887]; membrane [GO:0016020]; plasma membrane [GO:0005886]	integral component of plasma membrane [GO:0005887]; membrane [GO:0016020]; plasma membrane [GO:0005886]; ATP binding [GO:0005524]; phosphorelay sensor kinase activity [GO:0000155]; cellular response to cell envelope stress [GO:0036460]; protein autophosphorylation [GO:0046777]	ATP binding [GO:0005524]; phosphorelay sensor kinase activity [GO:0000155]	SUBCELLULAR LOCATION: Cell inner membrane {ECO:0000269|PubMed:15919996}; Multi-pass membrane protein {ECO:0000269|PubMed:15919996}.
BAMA_ECOLI	P0A940	Outer membrane protein assembly factor BamA (Omp85)	bamA	281	238	-0.0224692	0.344429	cell adhesion [GO:0007155]; Gram-negative-bacterium-type cell outer membrane assembly [GO:0043165]; protein insertion into membrane [GO:0051205]	Bam protein complex [GO:1990063]; cell outer membrane [GO:0009279]; integral component of membrane [GO:0016021]	Bam protein complex [GO:1990063]; cell outer membrane [GO:0009279]; integral component of membrane [GO:0016021]; cell adhesion [GO:0007155]; Gram-negative-bacterium-type cell outer membrane assembly [GO:0043165]; protein insertion into membrane [GO:0051205]		SUBCELLULAR LOCATION: Cell outer membrane {ECO:0000255|HAMAP-Rule:MF_01430, ECO:0000269|PubMed:16079137, ECO:0000269|PubMed:23882017, ECO:0000269|PubMed:24619089, ECO:0000269|PubMed:24914988, ECO:0000269|PubMed:26901871, ECO:0000269|PubMed:9298646}.
BAMB_ECOLI	P77774	Outer membrane protein assembly factor BamB	bamB	78	61	-0.0458612	0.185527	Gram-negative-bacterium-type cell outer membrane assembly [GO:0043165]; protein insertion into membrane [GO:0051205]	Bam protein complex [GO:1990063]; cell outer membrane [GO:0009279]	Bam protein complex [GO:1990063]; cell outer membrane [GO:0009279]; identical protein binding [GO:0042802]; Gram-negative-bacterium-type cell outer membrane assembly [GO:0043165]; protein insertion into membrane [GO:0051205]	identical protein binding [GO:0042802]	SUBCELLULAR LOCATION: Cell outer membrane {ECO:0000255|HAMAP-Rule:MF_00923, ECO:0000269|PubMed:15851030, ECO:0000269|PubMed:26900875, ECO:0000269|PubMed:26901871}; Lipid-anchor {ECO:0000255|HAMAP-Rule:MF_00923, ECO:0000269|PubMed:15851030, ECO:0000269|PubMed:27686148}.
BAMC_ECOLI	P0A903	Outer membrane protein assembly factor BamC	bamC	104	78	-0.0169825	0.589695	Gram-negative-bacterium-type cell outer membrane assembly [GO:0043165]; protein insertion into membrane [GO:0051205]	Bam protein complex [GO:1990063]; cell surface [GO:0009986]	Bam protein complex [GO:1990063]; cell surface [GO:0009986]; identical protein binding [GO:0042802]; Gram-negative-bacterium-type cell outer membrane assembly [GO:0043165]; protein insertion into membrane [GO:0051205]	identical protein binding [GO:0042802]	SUBCELLULAR LOCATION: Cell outer membrane {ECO:0000255|HAMAP-Rule:MF_00924, ECO:0000269|PubMed:16079137, ECO:0000269|PubMed:26900875, ECO:0000269|PubMed:26901871}; Lipid-anchor {ECO:0000255|HAMAP-Rule:MF_00924, ECO:0000269|PubMed:16079137, ECO:0000269|PubMed:27686148}.
BAMD_ECOLI	P0AC02	Outer membrane protein assembly factor BamD	bamD	82	63	-0.0808813	-0.495955	Gram-negative-bacterium-type cell outer membrane assembly [GO:0043165]; protein insertion into membrane [GO:0051205]	Bam protein complex [GO:1990063]; cell outer membrane [GO:0009279]	Bam protein complex [GO:1990063]; cell outer membrane [GO:0009279]; Gram-negative-bacterium-type cell outer membrane assembly [GO:0043165]; protein insertion into membrane [GO:0051205]		SUBCELLULAR LOCATION: Cell outer membrane {ECO:0000255|HAMAP-Rule:MF_00922, ECO:0000269|PubMed:16079137, ECO:0000269|PubMed:26900875, ECO:0000269|PubMed:26901871}; Lipid-anchor {ECO:0000255|HAMAP-Rule:MF_00922, ECO:0000269|PubMed:16079137, ECO:0000269|PubMed:27686148}.
BAME_ECOLI	P0A937	Outer membrane protein assembly factor BamE	bamE	7	5	-0.0652581	-0.0196068	Gram-negative-bacterium-type cell outer membrane assembly [GO:0043165]; protein insertion into membrane [GO:0051205]; response to antibiotic [GO:0046677]	Bam protein complex [GO:1990063]	Bam protein complex [GO:1990063]; identical protein binding [GO:0042802]; protein-macromolecule adaptor activity [GO:0030674]; Gram-negative-bacterium-type cell outer membrane assembly [GO:0043165]; protein insertion into membrane [GO:0051205]; response to antibiotic [GO:0046677]	identical protein binding [GO:0042802]; protein-macromolecule adaptor activity [GO:0030674]	SUBCELLULAR LOCATION: Cell outer membrane {ECO:0000255|HAMAP-Rule:MF_00925, ECO:0000269|PubMed:17404237, ECO:0000269|PubMed:26900875, ECO:0000269|PubMed:26901871}; Lipid-anchor {ECO:0000255|HAMAP-Rule:MF_00925, ECO:0000269|PubMed:17404237, ECO:0000269|PubMed:27686148}.
BARA_ECOLI	P0AEC5	Signal transduction histidine-protein kinase BarA (EC 2.7.13.3)	barA	7	6	0.0166675	-0.191928	protein autophosphorylation [GO:0046777]; protein phosphorylation [GO:0006468]; response to acetate [GO:0010034]; response to formic acid [GO:1901425]; response to hydrogen peroxide [GO:0042542]	integral component of plasma membrane [GO:0005887]; plasma membrane [GO:0005886]	integral component of plasma membrane [GO:0005887]; plasma membrane [GO:0005886]; ATP binding [GO:0005524]; histidine phosphotransfer kinase activity [GO:0009927]; phosphoprotein phosphatase activity [GO:0004721]; phosphorelay sensor kinase activity [GO:0000155]; protein histidine kinase activity [GO:0004673]; protein autophosphorylation [GO:0046777]; protein phosphorylation [GO:0006468]; respons…	ATP binding [GO:0005524]; histidine phosphotransfer kinase activity [GO:0009927]; phosphoprotein phosphatase activity [GO:0004721]; phosphorelay sensor kinase activity [GO:0000155]; protein histidine kinase activity [GO:0004673]	SUBCELLULAR LOCATION: Cell inner membrane {ECO:0000269|PubMed:15919996}; Multi-pass membrane protein {ECO:0000255}.
BASR_ECOLI	P30843	Transcriptional regulatory protein BasR	basR	3	2	-0.247317	-0.385694	phosphorelay signal transduction system [GO:0000160]; regulation of transcription, DNA-templated [GO:0006355]; response to antibiotic [GO:0046677]; response to iron(III) ion [GO:0010041]	cytosol [GO:0005829]; protein-DNA complex [GO:0032993]	cytosol [GO:0005829]; protein-DNA complex [GO:0032993]; DNA-binding transcription activator activity [GO:0001216]; phosphorelay response regulator activity [GO:0000156]; transcription cis-regulatory region binding [GO:0000976]; phosphorelay signal transduction system [GO:0000160]; regulation of transcription, DNA-templated [GO:0006355]; response to antibiotic [GO:0046677]; response to iron(III) i…	DNA-binding transcription activator activity [GO:0001216]; phosphorelay response regulator activity [GO:0000156]; transcription cis-regulatory region binding [GO:0000976]	SUBCELLULAR LOCATION: Cytoplasm {ECO:0000305}.
BCCP_ECOLI	P0ABD8	Biotin carboxyl carrier protein of acetyl-CoA carboxylase (BCCP)	accB	37	40	-0.0723242	-0.258866	fatty acid biosynthetic process [GO:0006633]; protein biotinylation [GO:0009305]	acetyl-CoA carboxylase complex [GO:0009317]; cytoplasm [GO:0005737]; cytosol [GO:0005829]	acetyl-CoA carboxylase complex [GO:0009317]; cytoplasm [GO:0005737]; cytosol [GO:0005829]; acetyl-CoA carboxylase activity [GO:0003989]; fatty acid biosynthetic process [GO:0006633]; protein biotinylation [GO:0009305]	acetyl-CoA carboxylase activity [GO:0003989]
BCP_ECOLI	P0AE52	Peroxiredoxin Bcp (EC 1.11.1.24) (Bacterioferritin comigratory protein) (Thioredoxin peroxidase) (Thioredoxin-dependent peroxiredoxin Bcp)	bcp	45	43	-0.0787156	-0.0214318	cell redox homeostasis [GO:0045454]; cellular response to oxidative stress [GO:0034599]; response to oxidative stress [GO:0006979]	cytoplasm [GO:0005737]; cytosol [GO:0005829]	cytoplasm [GO:0005737]; cytosol [GO:0005829]; hydroperoxide reductase activity [GO:0032843]; thioredoxin peroxidase activity [GO:0008379]; cell redox homeostasis [GO:0045454]; cellular response to oxidative stress [GO:0034599]; response to oxidative stress [GO:0006979]	hydroperoxide reductase activity [GO:0032843]; thioredoxin peroxidase activity [GO:0008379]
BCSB_ECOLI	P37652	Cyclic di-GMP-binding protein (Cellulose synthase regulatory subunit)	bcsB	6	4	-0.0475388	-0.306134	cellulose biosynthetic process [GO:0030244]; UDP-glucose metabolic process [GO:0006011]	integral component of membrane [GO:0016021]; plasma membrane [GO:0005886]	integral component of membrane [GO:0016021]; plasma membrane [GO:0005886]; cellulose biosynthetic process [GO:0030244]; UDP-glucose metabolic process [GO:0006011]		SUBCELLULAR LOCATION: Cell inner membrane; Single-pass type I membrane protein.
BCSE_ECOLI	P37657	Cyclic di-GMP binding protein BcsE (Cellulose biosynthesis protein BcsE)	bcsE	3	3	-0.125554	-2.11032	cellulose biosynthetic process [GO:0030244]		cyclic-di-GMP binding [GO:0035438]; cellulose biosynthetic process [GO:0030244]	cyclic-di-GMP binding [GO:0035438]
BDCR_ECOLI	P39334	HTH-type transcriptional repressor BdcR	bdcR	8	4	-0.0622549	-0.384791	negative regulation of transcription, DNA-templated [GO:0045892]; regulation of transcription, DNA-templated [GO:0006355]		DNA-binding transcription factor activity [GO:0003700]; transcription cis-regulatory region binding [GO:0000976]; negative regulation of transcription, DNA-templated [GO:0045892]; regulation of transcription, DNA-templated [GO:0006355]	DNA-binding transcription factor activity [GO:0003700]; transcription cis-regulatory region binding [GO:0000976]
BEPA_ECOLI	P66948	Beta-barrel assembly-enhancing protease (EC 3.4.-.-)	bepA	21	23	-0.0115176	-0.495907	chaperone-mediated protein folding [GO:0061077]; Gram-negative-bacterium-type cell outer membrane assembly [GO:0043165]; proteolysis involved in cellular protein catabolic process [GO:0051603]	membrane [GO:0016020]; outer membrane-bounded periplasmic space [GO:0030288]	membrane [GO:0016020]; outer membrane-bounded periplasmic space [GO:0030288]; metal ion binding [GO:0046872]; metalloendopeptidase activity [GO:0004222]; protein disulfide isomerase activity [GO:0003756]; zinc ion binding [GO:0008270]; chaperone-mediated protein folding [GO:0061077]; Gram-negative-bacterium-type cell outer membrane assembly [GO:0043165]; proteolysis involved in cellular protein c…	metal ion binding [GO:0046872]; metalloendopeptidase activity [GO:0004222]; protein disulfide isomerase activity [GO:0003756]; zinc ion binding [GO:0008270]	SUBCELLULAR LOCATION: Periplasm {ECO:0000255|HAMAP-Rule:MF_00997, ECO:0000269|PubMed:22491786, ECO:0000269|PubMed:24003122}. Note=A significant amount of BepA is membrane-associated. This localization could result from interaction with the BAM complex.
BETA_ECOLI	P17444	Oxygen-dependent choline dehydrogenase (CDH) (CHD) (EC 1.1.99.1) (Betaine aldehyde dehydrogenase) (BADH) (EC 1.2.1.8)	betA	6	6	0.0657888	1.17193	glycine betaine biosynthetic process from choline [GO:0019285]; response to osmotic stress [GO:0006970]	membrane [GO:0016020]; plasma membrane [GO:0005886]	membrane [GO:0016020]; plasma membrane [GO:0005886]; betaine-aldehyde dehydrogenase activity [GO:0008802]; choline dehydrogenase activity [GO:0008812]; flavin adenine dinucleotide binding [GO:0050660]; oxidoreductase activity [GO:0016491]; glycine betaine biosynthetic process from choline [GO:0019285]; response to osmotic stress [GO:0006970]	betaine-aldehyde dehydrogenase activity [GO:0008802]; choline dehydrogenase activity [GO:0008812]; flavin adenine dinucleotide binding [GO:0050660]; oxidoreductase activity [GO:0016491]	SUBCELLULAR LOCATION: Cell membrane {ECO:0000269|PubMed:3512525}; Peripheral membrane protein {ECO:0000269|PubMed:3512525}.
BETB_ECOLI	P17445	Betaine aldehyde dehydrogenase (BADH) (EC 1.2.1.8)	betB	26	31	0.0860036	1.14644	glycine betaine biosynthetic process from choline [GO:0019285]; response to osmotic stress [GO:0006970]; response to X-ray [GO:0010165]	cytosol [GO:0005829]; protein-containing complex [GO:0032991]	cytosol [GO:0005829]; protein-containing complex [GO:0032991]; aldehyde dehydrogenase (NAD+) activity [GO:0004029]; betaine-aldehyde dehydrogenase activity [GO:0008802]; identical protein binding [GO:0042802]; metal ion binding [GO:0046872]; glycine betaine biosynthetic process from choline [GO:0019285]; response to osmotic stress [GO:0006970]; response to X-ray [GO:0010165]	aldehyde dehydrogenase (NAD+) activity [GO:0004029]; betaine-aldehyde dehydrogenase activity [GO:0008802]; identical protein binding [GO:0042802]; metal ion binding [GO:0046872]
BETT_ECOLI	P0ABC9	High-affinity choline transport protein	betT	3	1	0.131682	0.0814686	cellular response to DNA damage stimulus [GO:0006974]; glycine betaine biosynthetic process from choline [GO:0019285]	integral component of membrane [GO:0016021]; integral component of plasma membrane [GO:0005887]; plasma membrane [GO:0005886]	integral component of membrane [GO:0016021]; integral component of plasma membrane [GO:0005887]; plasma membrane [GO:0005886]; choline transmembrane transporter activity [GO:0015220]; transmembrane transporter activity [GO:0022857]; cellular response to DNA damage stimulus [GO:0006974]; glycine betaine biosynthetic process from choline [GO:0019285]	choline transmembrane transporter activity [GO:0015220]; transmembrane transporter activity [GO:0022857]	SUBCELLULAR LOCATION: Cell inner membrane {ECO:0000269|PubMed:15919996}; Multi-pass membrane protein {ECO:0000269|PubMed:15919996}.
BFR_ECOLI	P0ABD3	Bacterioferritin (BFR) (EC 1.16.3.1) (Cytochrome b-1) (Cytochrome b-557)	bfr	39	40	-0.0619166	-1.04871	intracellular sequestering of iron ion [GO:0006880]; iron ion transport [GO:0006826]	cytosol [GO:0005829]; membrane [GO:0016020]	cytosol [GO:0005829]; membrane [GO:0016020]; ferric iron binding [GO:0008199]; ferroxidase activity [GO:0004322]; heme binding [GO:0020037]; identical protein binding [GO:0042802]; iron ion binding [GO:0005506]; oxidoreductase activity [GO:0016491]; intracellular sequestering of iron ion [GO:0006880]; iron ion transport [GO:0006826]	ferric iron binding [GO:0008199]; ferroxidase activity [GO:0004322]; heme binding [GO:0020037]; identical protein binding [GO:0042802]; iron ion binding [GO:0005506]; oxidoreductase activity [GO:0016491]
BGAL_ECOLI	P00722	Beta-galactosidase (Beta-gal) (EC 3.2.1.23) (Lactase)	lacZ	202	333	0.752673	-0.801847	lactose catabolic process [GO:0005990]	beta-galactosidase complex [GO:0009341]	beta-galactosidase complex [GO:0009341]; alkali metal ion binding [GO:0031420]; beta-galactosidase activity [GO:0004565]; carbohydrate binding [GO:0030246]; identical protein binding [GO:0042802]; magnesium ion binding [GO:0000287]; lactose catabolic process [GO:0005990]	alkali metal ion binding [GO:0031420]; beta-galactosidase activity [GO:0004565]; carbohydrate binding [GO:0030246]; identical protein binding [GO:0042802]; magnesium ion binding [GO:0000287]
BGLA_ECOLI	Q46829	6-phospho-beta-glucosidase BglA (EC 3.2.1.86) (Phospho-beta-glucosidase A)	bglA	62	61	-0.0932584	0.0817809	carbohydrate catabolic process [GO:0016052]	cytosol [GO:0005829]	cytosol [GO:0005829]; 6-phospho-beta-glucosidase activity [GO:0008706]; beta-glucosidase activity [GO:0008422]; glucosidase activity [GO:0015926]; methyl beta-D-glucoside 6-phosphate glucohydrolase activity [GO:0103047]; carbohydrate catabolic process [GO:0016052]	6-phospho-beta-glucosidase activity [GO:0008706]; beta-glucosidase activity [GO:0008422]; glucosidase activity [GO:0015926]; methyl beta-D-glucoside 6-phosphate glucohydrolase activity [GO:0103047]
BGLX_ECOLI	P33363	Periplasmic beta-glucosidase (EC 3.2.1.21) (Beta-D-glucoside glucohydrolase) (Cellobiase) (Gentiobiase)	bglX	63	72	0.0074759	-0.198147	glucan catabolic process [GO:0009251]	outer membrane-bounded periplasmic space [GO:0030288]; periplasmic space [GO:0042597]	outer membrane-bounded periplasmic space [GO:0030288]; periplasmic space [GO:0042597]; beta-glucosidase activity [GO:0008422]; glucosidase activity [GO:0015926]; scopolin beta-glucosidase activity [GO:0102483]; glucan catabolic process [GO:0009251]	beta-glucosidase activity [GO:0008422]; glucosidase activity [GO:0015926]; scopolin beta-glucosidase activity [GO:0102483]	SUBCELLULAR LOCATION: Periplasm.
BHSA_ECOLI	P0AB40	Multiple stress resistance protein BhsA (Copper-induced outer membrane component)	bhsA	6	6	0.0709782	1.81032	response to copper ion [GO:0046688]	cell outer membrane [GO:0009279]	cell outer membrane [GO:0009279]; response to copper ion [GO:0046688]		SUBCELLULAR LOCATION: Cell outer membrane {ECO:0000269|PubMed:22089859}.
BIOA_ECOLI	P12995	Adenosylmethionine-8-amino-7-oxononanoate aminotransferase (EC 2.6.1.62) (7,8-diamino-pelargonic acid aminotransferase) (DAPA AT) (DAPA aminotransferase) (7,8-diaminononanoate synthase) (DANS) (Diaminopelargonic acid synthase)	bioA	26	32	-0.107182	-0.0208216	biotin biosynthetic process [GO:0009102]	cytoplasm [GO:0005737]	cytoplasm [GO:0005737]; adenosylmethionine-8-amino-7-oxononanoate transaminase activity [GO:0004015]; pyridoxal phosphate binding [GO:0030170]; biotin biosynthetic process [GO:0009102]	adenosylmethionine-8-amino-7-oxononanoate transaminase activity [GO:0004015]; pyridoxal phosphate binding [GO:0030170]	SUBCELLULAR LOCATION: Cytoplasm {ECO:0000250}.
BIOB_ECOLI	P12996	Biotin synthase (EC 2.8.1.6)	bioB	73	61	-0.218474	0.165265	biotin biosynthetic process [GO:0009102]		2 iron, 2 sulfur cluster binding [GO:0051537]; 4 iron, 4 sulfur cluster binding [GO:0051539]; biotin synthase activity [GO:0004076]; iron ion binding [GO:0005506]; biotin biosynthetic process [GO:0009102]	2 iron, 2 sulfur cluster binding [GO:0051537]; 4 iron, 4 sulfur cluster binding [GO:0051539]; biotin synthase activity [GO:0004076]; iron ion binding [GO:0005506]
BIOD1_ECOLI	P13000	ATP-dependent dethiobiotin synthetase BioD 1 (EC 6.3.3.3) (DTB synthetase 1) (DTBS 1) (Dethiobiotin synthase 1)	bioD1	37	39	-0.0919636	0.629334	biotin biosynthetic process [GO:0009102]	cytosol [GO:0005829]	cytosol [GO:0005829]; ATP binding [GO:0005524]; dethiobiotin synthase activity [GO:0004141]; magnesium ion binding [GO:0000287]; biotin biosynthetic process [GO:0009102]	ATP binding [GO:0005524]; dethiobiotin synthase activity [GO:0004141]; magnesium ion binding [GO:0000287]	SUBCELLULAR LOCATION: Cytoplasm {ECO:0000255|HAMAP-Rule:MF_00336}.
BIOD2_ECOLI	P0A6E9	ATP-dependent dethiobiotin synthetase BioD 2 (EC 6.3.3.3) (DTB synthetase 2) (DTBS 2) (Dethiobiotin synthase 2)	bioD2	3	2	0.00644984	-0.11887	biotin biosynthetic process [GO:0009102]	cytosol [GO:0005829]	cytosol [GO:0005829]; ATP binding [GO:0005524]; dethiobiotin synthase activity [GO:0004141]; magnesium ion binding [GO:0000287]; biotin biosynthetic process [GO:0009102]	ATP binding [GO:0005524]; dethiobiotin synthase activity [GO:0004141]; magnesium ion binding [GO:0000287]	SUBCELLULAR LOCATION: Cytoplasm {ECO:0000255|HAMAP-Rule:MF_00336}.
BIOF_ECOLI	P12998	8-amino-7-oxononanoate synthase (AONS) (EC 2.3.1.47) (7-keto-8-amino-pelargonic acid synthase) (7-KAP synthase) (KAPA synthase) (8-amino-7-ketopelargonate synthase)	bioF	7	9	-0.169263	0.158629	biotin biosynthetic process [GO:0009102]		8-amino-7-oxononanoate synthase activity [GO:0008710]; pyridoxal phosphate binding [GO:0030170]; biotin biosynthetic process [GO:0009102]	8-amino-7-oxononanoate synthase activity [GO:0008710]; pyridoxal phosphate binding [GO:0030170]
BIOH_ECOLI	P13001	Pimeloyl-[acyl-carrier protein] methyl ester esterase (EC 3.1.1.85) (Biotin synthesis protein BioH) (Carboxylesterase BioH)	bioH	12	13	-0.0300978	0.0734596	biotin biosynthetic process [GO:0009102]	cytoplasm [GO:0005737]	cytoplasm [GO:0005737]; carboxylic ester hydrolase activity [GO:0052689]; pimelyl-[acyl-carrier protein] methyl ester esterase activity [GO:0090499]; biotin biosynthetic process [GO:0009102]	carboxylic ester hydrolase activity [GO:0052689]; pimelyl-[acyl-carrier protein] methyl ester esterase activity [GO:0090499]	SUBCELLULAR LOCATION: Cytoplasm {ECO:0000250}.
BIPA_ECOLI	P0DTT0	50S ribosomal subunit assembly factor BipA (EC 3.6.5.-) (GTP-binding protein BipA/TypA) (Ribosome assembly factor BipA) (Ribosome-dependent GTPase BipA) (Tyrosine phosphorylated protein A)	bipA	88	72	-0.0185169	-0.340457	ribosomal large subunit assembly [GO:0000027]	cytoplasm [GO:0005737]	cytoplasm [GO:0005737]; GTP binding [GO:0005525]; GTPase activity [GO:0003924]; ribosome binding [GO:0043022]; rRNA binding [GO:0019843]; tRNA binding [GO:0000049]; ribosomal large subunit assembly [GO:0000027]	GTPase activity [GO:0003924]; GTP binding [GO:0005525]; ribosome binding [GO:0043022]; rRNA binding [GO:0019843]; tRNA binding [GO:0000049]	SUBCELLULAR LOCATION: Cytoplasm {ECO:0000255|HAMAP-Rule:MF_00849, ECO:0000269|PubMed:30305394, ECO:0000269|Ref.12}. Note=Associates with 70S ribosomes and 30S and 50S subunits in the presence of GMPPNP (a nonhydrolyzable GTP analog) at both 20 and 37 degrees Celsius; no change in ribosome association is seen in the presence of ppGpp or when the stringent response is triggered. {ECO:0000269|PubMed…
BIRA_ECOLI	P06709	Bifunctional ligase/repressor BirA (Biotin operon repressor) (Biotin--[acetyl-CoA-carboxylase] ligase) (EC 6.3.4.15) (Biotin--protein ligase) (Biotin-[acetyl-CoA carboxylase] synthetase)	birA	15	17	-0.00734122	0.117349	biotin biosynthetic process [GO:0009102]; biotin metabolic process [GO:0006768]; protein biotinylation [GO:0009305]; regulation of transcription, DNA-templated [GO:0006355]	cytoplasm [GO:0005737]; transcription repressor complex [GO:0017053]	cytoplasm [GO:0005737]; transcription repressor complex [GO:0017053]; ATP binding [GO:0005524]; bacterial-type RNA polymerase transcription regulatory region sequence-specific DNA binding [GO:0000984]; biotin binding [GO:0009374]; biotin-[acetyl-CoA-carboxylase] ligase activity [GO:0004077]; DNA binding [GO:0003677]; protein homodimerization activity [GO:0042803]; biotin biosynthetic process [GO:…	ATP binding [GO:0005524]; bacterial-type RNA polymerase transcription regulatory region sequence-specific DNA binding [GO:0000984]; biotin-[acetyl-CoA-carboxylase] ligase activity [GO:0004077]; biotin binding [GO:0009374]; DNA binding [GO:0003677]; protein homodimerization activity [GO:0042803]
BISC_ECOLI	P20099	Biotin sulfoxide reductase (BDS reductase) (BSO reductase) (EC 1.-.-.-) (L-methionine-(S)-sulfoxide reductase) (Met-S-SO reductase) (EC 1.8.4.13)	bisC	5	8	-0.0658227	-0.317501	anaerobic respiration [GO:0009061]	outer membrane-bounded periplasmic space [GO:0030288]	outer membrane-bounded periplasmic space [GO:0030288]; electron transfer activity [GO:0009055]; L-methionine:thioredoxin-disulfide S-oxidoreductase activity [GO:0033744]; molybdenum ion binding [GO:0030151]; molybdopterin cofactor binding [GO:0043546]; anaerobic respiration [GO:0009061]	electron transfer activity [GO:0009055]; L-methionine:thioredoxin-disulfide S-oxidoreductase activity [GO:0033744]; molybdenum ion binding [GO:0030151]; molybdopterin cofactor binding [GO:0043546]
BLC_ECOLI	P0A901	Outer membrane lipoprotein Blc	blc	24	24	-0.120409	-0.89666	cellular response to DNA damage stimulus [GO:0006974]; lipid metabolic process [GO:0006629]; response to reactive oxygen species [GO:0000302]	cell outer membrane [GO:0009279]; cytoplasm [GO:0005737]	cell outer membrane [GO:0009279]; cytoplasm [GO:0005737]; lipid binding [GO:0008289]; cellular response to DNA damage stimulus [GO:0006974]; lipid metabolic process [GO:0006629]; response to reactive oxygen species [GO:0000302]	lipid binding [GO:0008289]	SUBCELLULAR LOCATION: Cell outer membrane; Lipid-anchor.
BLUR_ECOLI	P75989	HTH-type transcriptional repressor BluR	bluR	2	5	0.0790415	-0.777813	negative regulation of transcription, DNA-templated [GO:0045892]		DNA binding [GO:0003677]; DNA-binding transcription factor activity [GO:0003700]; negative regulation of transcription, DNA-templated [GO:0045892]	DNA binding [GO:0003677]; DNA-binding transcription factor activity [GO:0003700]
BOLA_ECOLI	P0ABE2	DNA-binding transcriptional regulator BolA	bolA	15	11	0.0261191	0.132586	transcription, DNA-templated [GO:0006351]	cytosol [GO:0005829]	cytosol [GO:0005829]; DNA binding [GO:0003677]; transcription, DNA-templated [GO:0006351]	DNA binding [GO:0003677]
BORD_ECOLI	P77330	Prophage lipoprotein Bor homolog (Lipoprotein Bor homolog from lambdoid prophage DLP12)	borD	16	13	0.0153866	-0.465911	cellular response to magnesium ion [GO:0071286]	plasma membrane [GO:0005886]	plasma membrane [GO:0005886]; cellular response to magnesium ion [GO:0071286]		SUBCELLULAR LOCATION: Cell membrane {ECO:0000305}; Lipid-anchor {ECO:0000305}.
BRNQ_ECOLI	P0AD99	Branched-chain amino acid transport system 2 carrier protein (LIV-II)	brnQ	1	4	0.00935638	0.30796	branched-chain amino acid transport [GO:0015803]; isoleucine transport [GO:0015818]; leucine transport [GO:0015820]; valine transport [GO:0015829]	integral component of membrane [GO:0016021]; plasma membrane [GO:0005886]	integral component of membrane [GO:0016021]; plasma membrane [GO:0005886]; L-isoleucine transmembrane transporter activity [GO:0015188]; L-leucine transmembrane transporter activity [GO:0015190]; L-valine transmembrane transporter activity [GO:0005304]; branched-chain amino acid transport [GO:0015803]; isoleucine transport [GO:0015818]; leucine transport [GO:0015820]; valine transport [GO:0015829]	L-isoleucine transmembrane transporter activity [GO:0015188]; L-leucine transmembrane transporter activity [GO:0015190]; L-valine transmembrane transporter activity [GO:0005304]	SUBCELLULAR LOCATION: Cell inner membrane; Multi-pass membrane protein.
BSMA_ECOLI	P39297	Lipoprotein BsmA (Biofilm stress and motility protein)	bsmA	3	2	-0.031221	-0.584126	cellular response to DNA damage stimulus [GO:0006974]; response to hydrogen peroxide [GO:0042542]; single-species biofilm formation [GO:0044010]	plasma membrane [GO:0005886]	plasma membrane [GO:0005886]; cellular response to DNA damage stimulus [GO:0006974]; response to hydrogen peroxide [GO:0042542]; single-species biofilm formation [GO:0044010]		SUBCELLULAR LOCATION: Cell membrane {ECO:0000255|PROSITE-ProRule:PRU00303}; Lipid-anchor {ECO:0000255|PROSITE-ProRule:PRU00303}.
BTSR_ECOLI	P0AFT5	Transcriptional regulatory protein BtsR	btsR	8	5	-0.0356197	-0.778998	phosphorelay signal transduction system [GO:0000160]; regulation of transcription, DNA-templated [GO:0006355]	cytosol [GO:0005829]; protein-DNA complex [GO:0032993]	cytosol [GO:0005829]; protein-DNA complex [GO:0032993]; DNA-binding transcription activator activity [GO:0001216]; phosphorelay response regulator activity [GO:0000156]; transcription cis-regulatory region binding [GO:0000976]; phosphorelay signal transduction system [GO:0000160]; regulation of transcription, DNA-templated [GO:0006355]	DNA-binding transcription activator activity [GO:0001216]; phosphorelay response regulator activity [GO:0000156]; transcription cis-regulatory region binding [GO:0000976]
BTSS_ECOLI	P0AD14	Sensor histidine kinase BtsS (EC 2.7.13.3)	btsS	1	1	-0.00359533	-0.0862792	cell wall organization [GO:0071555]; peptidyl-histidine phosphorylation [GO:0018106]; response to nutrient levels [GO:0031667]	integral component of plasma membrane [GO:0005887]; plasma membrane [GO:0005886]	integral component of plasma membrane [GO:0005887]; plasma membrane [GO:0005886]; ATP binding [GO:0005524]; phosphorelay sensor kinase activity [GO:0000155]; cell wall organization [GO:0071555]; peptidyl-histidine phosphorylation [GO:0018106]; response to nutrient levels [GO:0031667]	ATP binding [GO:0005524]; phosphorelay sensor kinase activity [GO:0000155]	SUBCELLULAR LOCATION: Cell inner membrane {ECO:0000269|PubMed:15919996}; Multi-pass membrane protein {ECO:0000255}.
BTST_ECOLI	P39396	Pyruvate/proton symporter BtsT (Brenztraubensaure transporter) (Pyruvate/H(+) symporter)	btsT	20	17	-0.0405192	-0.537741	cellular response to DNA damage stimulus [GO:0006974]; cellular response to nutrient levels [GO:0031669]; cellular response to starvation [GO:0009267]; plasma membrane pyruvate transport [GO:0006849]	integral component of plasma membrane [GO:0005887]; plasma membrane [GO:0005886]	integral component of plasma membrane [GO:0005887]; plasma membrane [GO:0005886]; pyruvate secondary active transmembrane transporter activity [GO:0005477]; symporter activity [GO:0015293]; cellular response to DNA damage stimulus [GO:0006974]; cellular response to nutrient levels [GO:0031669]; cellular response to starvation [GO:0009267]; plasma membrane pyruvate transport [GO:0006849]	pyruvate secondary active transmembrane transporter activity [GO:0005477]; symporter activity [GO:0015293]	SUBCELLULAR LOCATION: Cell inner membrane {ECO:0000269|PubMed:15919996, ECO:0000269|PubMed:22685278, ECO:0000269|PubMed:29061664}; Multi-pass membrane protein {ECO:0000305|PubMed:29061664}.
BTUB_ECOLI	P06129	Vitamin B12 transporter BtuB (Cobalamin receptor) (Outer membrane cobalamin translocator)	btuB	90	85	0.00360366	0.1076	cobalamin transport [GO:0015889]; ion transmembrane transport [GO:0034220]	integral component of membrane [GO:0016021]; intrinsic component of cell outer membrane [GO:0031230]; pore complex [GO:0046930]	integral component of membrane [GO:0016021]; intrinsic component of cell outer membrane [GO:0031230]; pore complex [GO:0046930]; ABC-type vitamin B12 transporter activity [GO:0015420]; metal ion binding [GO:0046872]; porin activity [GO:0015288]; protein domain specific binding [GO:0019904]; cobalamin transport [GO:0015889]; ion transmembrane transport [GO:0034220]	ABC-type vitamin B12 transporter activity [GO:0015420]; metal ion binding [GO:0046872]; porin activity [GO:0015288]; protein domain specific binding [GO:0019904]	SUBCELLULAR LOCATION: Cell outer membrane {ECO:0000269|PubMed:12595710, ECO:0000269|PubMed:12652322, ECO:0000269|PubMed:2687240, ECO:0000269|PubMed:2982793}; Multi-pass membrane protein {ECO:0000269|PubMed:12595710, ECO:0000269|PubMed:12652322, ECO:0000269|PubMed:2687240, ECO:0000269|PubMed:2982793}.
BTUD_ECOLI	P06611	Vitamin B12 import ATP-binding protein BtuD (EC 7.6.2.8) (Vitamin B12-transporting ATPase)	btuD	5	7	-0.0784561	-0.643526	cobalamin transport [GO:0015889]	ATP-binding cassette (ABC) transporter complex [GO:0043190]; extrinsic component of membrane [GO:0019898]	ATP-binding cassette (ABC) transporter complex [GO:0043190]; extrinsic component of membrane [GO:0019898]; ABC-type vitamin B12 transporter activity [GO:0015420]; ATP binding [GO:0005524]; ATPase-coupled transmembrane transporter activity [GO:0042626]; cobalamin transport [GO:0015889]	ABC-type vitamin B12 transporter activity [GO:0015420]; ATPase-coupled transmembrane transporter activity [GO:0042626]; ATP binding [GO:0005524]	SUBCELLULAR LOCATION: Cell inner membrane; Peripheral membrane protein.
BTUE_ECOLI	P06610	Thioredoxin/glutathione peroxidase BtuE (EC 1.11.1.24) (EC 1.11.1.9)	btuE	65	53	-0.111195	-0.104409	response to hydroperoxide [GO:0033194]	periplasmic space [GO:0042597]	periplasmic space [GO:0042597]; glutathione peroxidase activity [GO:0004602]; thioredoxin peroxidase activity [GO:0008379]; response to hydroperoxide [GO:0033194]	glutathione peroxidase activity [GO:0004602]; thioredoxin peroxidase activity [GO:0008379]	SUBCELLULAR LOCATION: Periplasm {ECO:0000305|PubMed:3528129}. Note=Appears to have a periplasmic location. It has the mean hydropathy of a soluble protein but lacks an obvious signal sequence. {ECO:0000305|PubMed:3528129}.
BTUF_ECOLI	P37028	Vitamin B12-binding protein	btuF	2	3	0.0885795	0.0320889	cobalamin transport [GO:0015889]	outer membrane-bounded periplasmic space [GO:0030288]; periplasmic space [GO:0042597]	outer membrane-bounded periplasmic space [GO:0030288]; periplasmic space [GO:0042597]; cobalamin binding [GO:0031419]; cobalamin transport [GO:0015889]	cobalamin binding [GO:0031419]	SUBCELLULAR LOCATION: Periplasm {ECO:0000255|HAMAP-Rule:MF_01000, ECO:0000269|PubMed:11790740}.
BTUR_ECOLI	P0A9H5	Corrinoid adenosyltransferase (EC 2.5.1.17) (Cob(II)alamin adenosyltransferase) (Cob(II)yrinic acid a,c-diamide adenosyltransferase) (Cobinamide/cobalamin adenosyltransferase)	btuR	13	6	0.0781335	0.124828	aerobic cobalamin biosynthetic process [GO:0019250]; cobalamin biosynthetic process [GO:0009236]; porphyrin-containing compound biosynthetic process [GO:0006779]	cytoplasm [GO:0005737]	cytoplasm [GO:0005737]; ATP binding [GO:0005524]; cob(I)yrinic acid a,c-diamide adenosyltransferase activity [GO:0008817]; aerobic cobalamin biosynthetic process [GO:0019250]; cobalamin biosynthetic process [GO:0009236]; porphyrin-containing compound biosynthetic process [GO:0006779]	ATP binding [GO:0005524]; cob(I)yrinic acid a,c-diamide adenosyltransferase activity [GO:0008817]	SUBCELLULAR LOCATION: Cytoplasm.
CAID_ECOLI	P31551	Carnitinyl-CoA dehydratase (EC 4.2.1.149) (Crotonobetainyl-CoA hydratase)	caiD	9	8	-0.0142502	0.759946	carnitine catabolic process [GO:0042413]		carnitine racemase activity [GO:0008809]; hydro-lyase activity [GO:0016836]; carnitine catabolic process [GO:0042413]	carnitine racemase activity [GO:0008809]; hydro-lyase activity [GO:0016836]
CAN_ECOLI	P61517	Carbonic anhydrase 2 (EC 4.2.1.1) (Carbonate dehydratase 2)	can	56	43	-0.0876573	0.181377	carbon utilization [GO:0015976]	cytosol [GO:0005829]	cytosol [GO:0005829]; carbonate dehydratase activity [GO:0004089]; zinc ion binding [GO:0008270]; carbon utilization [GO:0015976]	carbonate dehydratase activity [GO:0004089]; zinc ion binding [GO:0008270]
CAPP_ECOLI	P00864	Phosphoenolpyruvate carboxylase (PEPC) (PEPCase) (EC 4.1.1.31)	ppc	163	129	-0.0435825	-0.442681	carbon fixation [GO:0015977]; oxaloacetate metabolic process [GO:0006107]; tricarboxylic acid cycle [GO:0006099]	cytosol [GO:0005829]	cytosol [GO:0005829]; magnesium ion binding [GO:0000287]; phosphoenolpyruvate carboxylase activity [GO:0008964]; carbon fixation [GO:0015977]; oxaloacetate metabolic process [GO:0006107]; tricarboxylic acid cycle [GO:0006099]	magnesium ion binding [GO:0000287]; phosphoenolpyruvate carboxylase activity [GO:0008964]
CARA_ECOLI	P0A6F1	Carbamoyl-phosphate synthase small chain (EC 6.3.5.5) (Carbamoyl-phosphate synthetase glutamine chain)	carA	115	103	-0.0653991	0.175779	'de novo' pyrimidine nucleobase biosynthetic process [GO:0006207]; 'de novo' UMP biosynthetic process [GO:0044205]; arginine biosynthetic process [GO:0006526]; glutamine metabolic process [GO:0006541]; nitrogen compound metabolic process [GO:0006807]	carbamoyl-phosphate synthase complex [GO:0005951]; cytoplasm [GO:0005737]; cytosol [GO:0005829]	carbamoyl-phosphate synthase complex [GO:0005951]; cytoplasm [GO:0005737]; cytosol [GO:0005829]; ATP binding [GO:0005524]; carbamoyl-phosphate synthase (glutamine-hydrolyzing) activity [GO:0004088]; 'de novo' pyrimidine nucleobase biosynthetic process [GO:0006207]; 'de novo' UMP biosynthetic process [GO:0044205]; arginine biosynthetic process [GO:0006526]; glutamine metabolic process [GO:0006541]…	ATP binding [GO:0005524]; carbamoyl-phosphate synthase (glutamine-hydrolyzing) activity [GO:0004088]
CARB_ECOLI	P00968	Carbamoyl-phosphate synthase large chain (EC 6.3.5.5) (Carbamoyl-phosphate synthetase ammonia chain)	carB	448	395	-0.0430471	0.452067	'de novo' UMP biosynthetic process [GO:0044205]; arginine biosynthetic process [GO:0006526]; cellular amino acid biosynthetic process [GO:0008652]; glutamine metabolic process [GO:0006541]; nitrogen compound metabolic process [GO:0006807]; pyrimidine nucleobase biosynthetic process [GO:0019856]	carbamoyl-phosphate synthase complex [GO:0005951]; cytoplasm [GO:0005737]; cytosol [GO:0005829]	carbamoyl-phosphate synthase complex [GO:0005951]; cytoplasm [GO:0005737]; cytosol [GO:0005829]; amino acid binding [GO:0016597]; ATP binding [GO:0005524]; carbamoyl-phosphate synthase (ammonia) activity [GO:0004087]; carbamoyl-phosphate synthase (glutamine-hydrolyzing) activity [GO:0004088]; metal ion binding [GO:0046872]; nucleotide binding [GO:0000166]; 'de novo' UMP biosynthetic process [GO:0…	amino acid binding [GO:0016597]; ATP binding [GO:0005524]; carbamoyl-phosphate synthase (ammonia) activity [GO:0004087]; carbamoyl-phosphate synthase (glutamine-hydrolyzing) activity [GO:0004088]; metal ion binding [GO:0046872]; nucleotide binding [GO:0000166]
CATE_ECOLI	P21179	Catalase HPII (EC 1.11.1.6) (Hydroxyperoxidase II)	katE	68	48	-0.254136	-0.258271	cellular response to DNA damage stimulus [GO:0006974]; hydrogen peroxide catabolic process [GO:0042744]; hyperosmotic response [GO:0006972]; response to oxidative stress [GO:0006979]	cytoplasm [GO:0005737]; cytosol [GO:0005829]	cytoplasm [GO:0005737]; cytosol [GO:0005829]; catalase activity [GO:0004096]; heme binding [GO:0020037]; identical protein binding [GO:0042802]; iron ion binding [GO:0005506]; cellular response to DNA damage stimulus [GO:0006974]; hydrogen peroxide catabolic process [GO:0042744]; hyperosmotic response [GO:0006972]; response to oxidative stress [GO:0006979]	catalase activity [GO:0004096]; heme binding [GO:0020037]; identical protein binding [GO:0042802]; iron ion binding [GO:0005506]	SUBCELLULAR LOCATION: Cytoplasm {ECO:0000305}.
CBL_ECOLI	Q47083	HTH-type transcriptional regulator cbl	cbl	1	5	-0.430175	-0.276089	cysteine biosynthetic process [GO:0019344]; positive regulation of sulfur utilization [GO:0045883]; regulation of transcription, DNA-templated [GO:0006355]		DNA-binding transcription factor activity [GO:0003700]; transcription cis-regulatory region binding [GO:0000976]; cysteine biosynthetic process [GO:0019344]; positive regulation of sulfur utilization [GO:0045883]; regulation of transcription, DNA-templated [GO:0006355]	DNA-binding transcription factor activity [GO:0003700]; transcription cis-regulatory region binding [GO:0000976]
CBPA_ECOLI	P36659	Curved DNA-binding protein	cbpA	24	31	-0.14769	-0.337795	chaperone cofactor-dependent protein refolding [GO:0051085]; protein refolding [GO:0042026]	cytoplasm [GO:0005737]; nucleoid [GO:0009295]	cytoplasm [GO:0005737]; nucleoid [GO:0009295]; bent DNA binding [GO:0003681]; unfolded protein binding [GO:0051082]; chaperone cofactor-dependent protein refolding [GO:0051085]; protein refolding [GO:0042026]	bent DNA binding [GO:0003681]; unfolded protein binding [GO:0051082]	SUBCELLULAR LOCATION: Cytoplasm, nucleoid {ECO:0000269|PubMed:10947847, ECO:0000269|PubMed:8302830}.
CCA_ECOLI	P06961	Multifunctional CCA protein [Includes: CCA-adding enzyme (EC 2.7.7.72) (CCA tRNA nucleotidyltransferase) (tRNA CCA-pyrophosphorylase) (tRNA adenylyl-/cytidylyl-transferase) (tRNA nucleotidyltransferase) (tRNA-NT); 2'-nucleotidase (EC 3.1.3.-); 2',3'-cyclic phosphodiesterase (EC 3.1.4.-); Phosphatase (EC 3.1.3.-)]	cca	9	11	-0.0960394	-0.386599	RNA repair [GO:0042245]; tRNA 3'-terminal CCA addition [GO:0001680]		ATP binding [GO:0005524]; ATP:3'-cytidine-cytidine-tRNA adenylyltransferase activity [GO:0052929]; CTP:3'-cytidine-tRNA cytidylyltransferase activity [GO:0052928]; CTP:tRNA cytidylyltransferase activity [GO:0052927]; cyclic-nucleotide phosphodiesterase activity [GO:0004112]; magnesium ion binding [GO:0000287]; phosphatase activity [GO:0016791]; tRNA adenylyltransferase activity [GO:0004810]; tRNA…	ATP:3'-cytidine-cytidine-tRNA adenylyltransferase activity [GO:0052929]; ATP binding [GO:0005524]; CTP:3'-cytidine-tRNA cytidylyltransferase activity [GO:0052928]; CTP:tRNA cytidylyltransferase activity [GO:0052927]; cyclic-nucleotide phosphodiesterase activity [GO:0004112]; magnesium ion binding [GO:0000287]; phosphatase activity [GO:0016791]; tRNA adenylyltransferase activity [GO:0004810]; tRNA…
CCME_ECOLI	P69490	Cytochrome c-type biogenesis protein CcmE (Cytochrome c maturation protein E) (Heme chaperone CcmE)	ccmE	3	7	0.00483796	0.494684	cytochrome c-heme linkage [GO:0018063]; heme transport [GO:0015886]	integral component of membrane [GO:0016021]; intrinsic component of periplasmic side of plasma membrane [GO:0031237]	integral component of membrane [GO:0016021]; intrinsic component of periplasmic side of plasma membrane [GO:0031237]; heme binding [GO:0020037]; metal ion binding [GO:0046872]; cytochrome c-heme linkage [GO:0018063]; heme transport [GO:0015886]	heme binding [GO:0020037]; metal ion binding [GO:0046872]	SUBCELLULAR LOCATION: Cell inner membrane {ECO:0000255|HAMAP-Rule:MF_01959}; Single-pass type II membrane protein {ECO:0000255|HAMAP-Rule:MF_01959}; Periplasmic side {ECO:0000255|HAMAP-Rule:MF_01959}. Note=Stabilized by CcmD in the membrane.
CCMH_ECOLI	P0ABM9	Cytochrome c-type biogenesis protein CcmH	ccmH	4	9	0.0055279	0.443464	cytochrome c-heme linkage via heme-L-cysteine [GO:0018378]; cytochrome complex assembly [GO:0017004]	integral component of membrane [GO:0016021]; intrinsic component of periplasmic side of plasma membrane [GO:0031237]; plasma membrane [GO:0005886]	integral component of membrane [GO:0016021]; intrinsic component of periplasmic side of plasma membrane [GO:0031237]; plasma membrane [GO:0005886]; metal ion binding [GO:0046872]; protein-disulfide reductase activity [GO:0015035]; cytochrome c-heme linkage via heme-L-cysteine [GO:0018378]; cytochrome complex assembly [GO:0017004]	metal ion binding [GO:0046872]; protein-disulfide reductase activity [GO:0015035]	SUBCELLULAR LOCATION: Cell inner membrane; Multi-pass membrane protein.
CDD_ECOLI	P0ABF6	Cytidine deaminase (EC 3.5.4.5) (Cytidine aminohydrolase) (CDA)	cdd	26	28	0.0327237	0.520582	cytidine deamination [GO:0009972]; deoxycytidine catabolic process [GO:0006217]; nucleobase-containing small molecule interconversion [GO:0015949]	cytosol [GO:0005829]	cytosol [GO:0005829]; cytidine deaminase activity [GO:0004126]; deoxycytidine deaminase activity [GO:0047844]; identical protein binding [GO:0042802]; pyrimidine nucleoside binding [GO:0001884]; zinc ion binding [GO:0008270]; cytidine deamination [GO:0009972]; deoxycytidine catabolic process [GO:0006217]; nucleobase-containing small molecule interconversion [GO:0015949]	cytidine deaminase activity [GO:0004126]; deoxycytidine deaminase activity [GO:0047844]; identical protein binding [GO:0042802]; pyrimidine nucleoside binding [GO:0001884]; zinc ion binding [GO:0008270]
CDH_ECOLI	P06282	CDP-diacylglycerol pyrophosphatase (EC 3.6.1.26) (CDP-diacylglycerol phosphatidylhydrolase) (CDP-diglyceride hydrolase)	cdh	3	4	0.0455774	-0.113528	CDP-diacylglycerol catabolic process [GO:0046342]; phospholipid biosynthetic process [GO:0008654]	integral component of membrane [GO:0016021]; plasma membrane [GO:0005886]	integral component of membrane [GO:0016021]; plasma membrane [GO:0005886]; CDP-diacylglycerol diphosphatase activity [GO:0008715]; CDP-diacylglycerol catabolic process [GO:0046342]; phospholipid biosynthetic process [GO:0008654]	CDP-diacylglycerol diphosphatase activity [GO:0008715]	SUBCELLULAR LOCATION: Cell inner membrane; Single-pass membrane protein.
CECR_ECOLI	P0ACU0	HTH-type transcriptional dual regulator CecR (Regulator of cefoperazone and chloramphenicol sensitivity)	cecR	2	5	0.00991061	0.160262	negative regulation of DNA-templated transcription, initiation [GO:2000143]; positive regulation of DNA-templated transcription, initiation [GO:2000144]; regulation of transcription, DNA-templated [GO:0006355]; transcription, DNA-templated [GO:0006351]	cytoplasm [GO:0005737]	cytoplasm [GO:0005737]; DNA-binding transcription factor activity [GO:0003700]; identical protein binding [GO:0042802]; transcription cis-regulatory region binding [GO:0000976]; negative regulation of DNA-templated transcription, initiation [GO:2000143]; positive regulation of DNA-templated transcription, initiation [GO:2000144]; regulation of transcription, DNA-templated [GO:0006355]; transcript…	DNA-binding transcription factor activity [GO:0003700]; identical protein binding [GO:0042802]; transcription cis-regulatory region binding [GO:0000976]	SUBCELLULAR LOCATION: Cytoplasm {ECO:0000305}.
CEDA_ECOLI	P0AE60	Cell division activator CedA	cedA	5	4	0.05115	-0.00477851	cell cycle [GO:0007049]; cell division [GO:0051301]; regulation of cell division [GO:0051302]		double-stranded DNA binding [GO:0003690]; cell cycle [GO:0007049]; cell division [GO:0051301]; regulation of cell division [GO:0051302]	double-stranded DNA binding [GO:0003690]
CFA_ECOLI	P0A9H7	Cyclopropane-fatty-acyl-phospholipid synthase (CFA synthase) (Cyclopropane fatty acid synthase) (EC 2.1.1.79)	cfa	23	28	-0.16954	0.341035	fatty acid biosynthetic process [GO:0006633]; lipid modification [GO:0030258]; methylation [GO:0032259]	cytosol [GO:0005829]	cytosol [GO:0005829]; bicarbonate binding [GO:0071890]; cyclopropane-fatty-acyl-phospholipid synthase activity [GO:0008825]; fatty acid biosynthetic process [GO:0006633]; lipid modification [GO:0030258]; methylation [GO:0032259]	bicarbonate binding [GO:0071890]; cyclopropane-fatty-acyl-phospholipid synthase activity [GO:0008825]	SUBCELLULAR LOCATION: Cytoplasm.
CH10_ECOLI	P0A6F9	Co-chaperonin GroES (10 kDa chaperonin) (Chaperonin-10) (Cpn10)	groES	60	45	0.249622	-0.15577	cell cycle [GO:0007049]; cell division [GO:0051301]; chaperone cofactor-dependent protein refolding [GO:0051085]; protein folding [GO:0006457]; response to heat [GO:0009408]; virion assembly [GO:0019068]	cytosol [GO:0005829]; GroEL-GroES complex [GO:1990220]	cytosol [GO:0005829]; GroEL-GroES complex [GO:1990220]; ATP binding [GO:0005524]; chaperone binding [GO:0051087]; identical protein binding [GO:0042802]; metal ion binding [GO:0046872]; unfolded protein binding [GO:0051082]; cell cycle [GO:0007049]; cell division [GO:0051301]; chaperone cofactor-dependent protein refolding [GO:0051085]; protein folding [GO:0006457]; response to heat [GO:0009408];…	ATP binding [GO:0005524]; chaperone binding [GO:0051087]; identical protein binding [GO:0042802]; metal ion binding [GO:0046872]; unfolded protein binding [GO:0051082]	SUBCELLULAR LOCATION: Cytoplasm {ECO:0000255|HAMAP-Rule:MF_00580, ECO:0000269|PubMed:22380631}. Note=Exclusively localized in foci, usually near 1 cell pole in mid-to-late exponential phase; polar localization depends on the minCDE operon. Foci form near midcell.
CH60_ECOLI	P0A6F5	Chaperonin GroEL (EC 5.6.1.7) (60 kDa chaperonin) (Chaperonin-60) (Cpn60) (GroEL protein)	groEL	453	402	0.253147	-0.0894975	cell cycle [GO:0007049]; cell division [GO:0051301]; chaperone cofactor-dependent protein refolding [GO:0051085]; protein folding [GO:0006457]; protein refolding [GO:0042026]; response to heat [GO:0009408]; response to radiation [GO:0009314]; virion assembly [GO:0019068]	cytosol [GO:0005829]; GroEL-GroES complex [GO:1990220]; membrane [GO:0016020]	cytosol [GO:0005829]; GroEL-GroES complex [GO:1990220]; membrane [GO:0016020]; ATP binding [GO:0005524]; identical protein binding [GO:0042802]; magnesium ion binding [GO:0000287]; unfolded protein binding [GO:0051082]; cell cycle [GO:0007049]; cell division [GO:0051301]; chaperone cofactor-dependent protein refolding [GO:0051085]; protein folding [GO:0006457]; protein refolding [GO:0042026]; res…	ATP binding [GO:0005524]; identical protein binding [GO:0042802]; magnesium ion binding [GO:0000287]; unfolded protein binding [GO:0051082]	SUBCELLULAR LOCATION: Cytoplasm {ECO:0000255|HAMAP-Rule:MF_00600, ECO:0000269|PubMed:20094032, ECO:0000269|PubMed:22380631}. Note=Uniformly located in the cytoplasm (PubMed:20094032). Exclusively localized in foci, usually near 1 cell pole in mid-to-late exponential phase (PubMed:22380631); polar localization depends on the minCDE operon. Foci form near midcell (Probable). {ECO:0000269|PubMed:200…
CHAB_ECOLI	P0AE63	Putative cation transport regulator ChaB	chaB	6	3	-0.106292	-0.591113
CHBF_ECOLI	P17411	6-phospho-beta-glucosidase (EC 3.2.1.86) (Cellobiose-6-phosphate hydrolase) (Phospho-chitobiase)	chbF	1	8	0.0949667	0.472078	carbohydrate metabolic process [GO:0005975]		6-phospho-beta-glucosidase activity [GO:0008706]; identical protein binding [GO:0042802]; metal ion binding [GO:0046872]; methyl beta-D-glucoside 6-phosphate glucohydrolase activity [GO:0103047]; oxidoreductase activity, acting on the CH-OH group of donors, NAD or NADP as acceptor [GO:0016616]; carbohydrate metabolic process [GO:0005975]	6-phospho-beta-glucosidase activity [GO:0008706]; identical protein binding [GO:0042802]; metal ion binding [GO:0046872]; methyl beta-D-glucoside 6-phosphate glucohydrolase activity [GO:0103047]; oxidoreductase activity, acting on the CH-OH group of donors, NAD or NADP as acceptor [GO:0016616]
CHEW_ECOLI	P0A964	Chemotaxis protein CheW	cheW	2	7	-0.0970357	0.192959	aerotaxis [GO:0009454]; chemotaxis [GO:0006935]; establishment of localization in cell [GO:0051649]; positive regulation of post-translational protein modification [GO:1901875]; positive regulation of protein histidine kinase activity [GO:0010864]; signal transduction [GO:0007165]	cell tip [GO:0051286]; cytosol [GO:0005829]; methyl accepting chemotaxis protein complex [GO:0098561]; plasma membrane [GO:0005886]	cell tip [GO:0051286]; cytosol [GO:0005829]; methyl accepting chemotaxis protein complex [GO:0098561]; plasma membrane [GO:0005886]; protein domain specific binding [GO:0019904]; aerotaxis [GO:0009454]; chemotaxis [GO:0006935]; establishment of localization in cell [GO:0051649]; positive regulation of post-translational protein modification [GO:1901875]; positive regulation of protein histidine k…	protein domain specific binding [GO:0019904]	SUBCELLULAR LOCATION: Cytoplasm.
CHEY_ECOLI	P0AE67	Chemotaxis protein CheY	cheY	4	6	-0.0709445	0.561899	aerotaxis [GO:0009454]; archaeal or bacterial-type flagellum-dependent cell motility [GO:0097588]; chemotaxis [GO:0006935]; internal peptidyl-lysine acetylation [GO:0018393]; protein acetylation [GO:0006473]; regulation of bacterial-type flagellum-dependent cell motility [GO:1902021]; thermotaxis [GO:0043052]	cytosol [GO:0005829]	cytosol [GO:0005829]; acetyltransferase activity [GO:0016407]; magnesium ion binding [GO:0000287]; phosphorelay response regulator activity [GO:0000156]; aerotaxis [GO:0009454]; archaeal or bacterial-type flagellum-dependent cell motility [GO:0097588]; chemotaxis [GO:0006935]; internal peptidyl-lysine acetylation [GO:0018393]; protein acetylation [GO:0006473]; regulation of bacterial-type flagell…	acetyltransferase activity [GO:0016407]; magnesium ion binding [GO:0000287]; phosphorelay response regulator activity [GO:0000156]	SUBCELLULAR LOCATION: Cytoplasm.
CHEZ_ECOLI	P0A9H9	Protein phosphatase CheZ (EC 3.1.3.-) (Chemotaxis protein CheZ)	cheZ	2	2	-0.120343	0.233626	bacterial-type flagellum-dependent swarming motility [GO:0071978]; chemotaxis [GO:0006935]; protein dephosphorylation [GO:0006470]; regulation of chemotaxis [GO:0050920]	bacterial-type flagellum [GO:0009288]; cytosol [GO:0005829]; methyl accepting chemotaxis protein complex [GO:0098561]; plasma membrane [GO:0005886]	bacterial-type flagellum [GO:0009288]; cytosol [GO:0005829]; methyl accepting chemotaxis protein complex [GO:0098561]; plasma membrane [GO:0005886]; identical protein binding [GO:0042802]; phosphoprotein phosphatase activity [GO:0004721]; bacterial-type flagellum-dependent swarming motility [GO:0071978]; chemotaxis [GO:0006935]; protein dephosphorylation [GO:0006470]; regulation of chemotaxis [GO…	identical protein binding [GO:0042802]; phosphoprotein phosphatase activity [GO:0004721]	SUBCELLULAR LOCATION: Cytoplasm {ECO:0000269|PubMed:12644507}. Note=Colocalizes with CheA chemoreceptor patches near the cell poles, which requires CheA(short).
CHIA_ECOLI	P13656	Probable bifunctional chitinase/lysozyme [Includes: Chitinase (EC 3.2.1.14); Lysozyme (EC 3.2.1.17)]	chiA	1	3	0.109291	-0.395532	chitin catabolic process [GO:0006032]; polysaccharide catabolic process [GO:0000272]	extracellular region [GO:0005576]; outer membrane-bounded periplasmic space [GO:0030288]; periplasmic space [GO:0042597]	extracellular region [GO:0005576]; outer membrane-bounded periplasmic space [GO:0030288]; periplasmic space [GO:0042597]; carbohydrate binding [GO:0030246]; chitin binding [GO:0008061]; endochitinase activity [GO:0008843]; lysozyme activity [GO:0003796]; chitin catabolic process [GO:0006032]; polysaccharide catabolic process [GO:0000272]	carbohydrate binding [GO:0030246]; chitin binding [GO:0008061]; endochitinase activity [GO:0008843]; lysozyme activity [GO:0003796]	SUBCELLULAR LOCATION: Periplasm {ECO:0000269|PubMed:10760150}. Note=Secreted via the Gsp type II secretion machinery under conditions of derepressed gsp gene expression.
CHPB_ECOLI	P33647	Endoribonuclease toxin ChpB (EC 3.1.-.-) (Toxin ChpB) (mRNA interferase ChpB)	chpB	1	1	0.447305	-0.45416	mRNA catabolic process [GO:0006402]; negative regulation of cell growth [GO:0030308]; regulation of mRNA stability [GO:0043488]; rRNA catabolic process [GO:0016075]		DNA binding [GO:0003677]; endoribonuclease activity [GO:0004521]; endoribonuclease activity, producing 5'-phosphomonoesters [GO:0016891]; RNA binding [GO:0003723]; mRNA catabolic process [GO:0006402]; negative regulation of cell growth [GO:0030308]; regulation of mRNA stability [GO:0043488]; rRNA catabolic process [GO:0016075]	DNA binding [GO:0003677]; endoribonuclease activity [GO:0004521]; endoribonuclease activity, producing 5'-phosphomonoesters [GO:0016891]; RNA binding [GO:0003723]
CHPS_ECOLI	P08365	Antitoxin ChpS	chpS	1	1	0.049071	0.0140244	positive regulation of cell growth [GO:0030307]		DNA binding [GO:0003677]; positive regulation of cell growth [GO:0030307]	DNA binding [GO:0003677]
CHRR_ECOLI	P0AGE6	Quinone reductase (EC 1.6.5.2) (Chromate reductase) (CHRR) (EC 1.6.-.-) (NAD(P)H dehydrogenase (quinone))	chrR	18	12	-0.105658	-0.126259	xenobiotic metabolic process [GO:0006805]	cytosol [GO:0005829]	cytosol [GO:0005829]; FMN binding [GO:0010181]; NADH dehydrogenase (quinone) activity [GO:0050136]; NADPH dehydrogenase (quinone) activity [GO:0008753]; oxidoreductase activity [GO:0016491]; xenobiotic metabolic process [GO:0006805]	FMN binding [GO:0010181]; NADH dehydrogenase (quinone) activity [GO:0050136]; NADPH dehydrogenase (quinone) activity [GO:0008753]; oxidoreductase activity [GO:0016491]
CINAL_ECOLI	P77808	NMN amidohydrolase-like protein YfaY	yfaY	28	22	0.0563438	0.55366
CIRA_ECOLI	P17315	Colicin I receptor	cirA	169	127	-0.141345	-0.0909465	iron ion homeostasis [GO:0055072]; siderophore transmembrane transport [GO:0044718]	cell outer membrane [GO:0009279]; integral component of membrane [GO:0016021]; intrinsic component of cell outer membrane [GO:0031230]	cell outer membrane [GO:0009279]; integral component of membrane [GO:0016021]; intrinsic component of cell outer membrane [GO:0031230]; colicin transmembrane transporter activity [GO:0042912]; siderophore transmembrane transporter activity [GO:0015343]; siderophore uptake transmembrane transporter activity [GO:0015344]; iron ion homeostasis [GO:0055072]; siderophore transmembrane transport [GO:00…	colicin transmembrane transporter activity [GO:0042912]; siderophore transmembrane transporter activity [GO:0015343]; siderophore uptake transmembrane transporter activity [GO:0015344]	SUBCELLULAR LOCATION: Cell outer membrane.
CISY_ECOLI	P0ABH7	Citrate synthase (EC 2.3.3.16)	gltA	129	104	0.107859	-0.236181	protein hexamerization [GO:0034214]; tricarboxylic acid cycle [GO:0006099]	cytosol [GO:0005829]	cytosol [GO:0005829]; citrate (Si)-synthase activity [GO:0004108]; identical protein binding [GO:0042802]; NADH binding [GO:0070404]; protein hexamerization [GO:0034214]; tricarboxylic acid cycle [GO:0006099]	citrate (Si)-synthase activity [GO:0004108]; identical protein binding [GO:0042802]; NADH binding [GO:0070404]
CLPA_ECOLI	P0ABH9	ATP-dependent Clp protease ATP-binding subunit ClpA	clpA	129	109	0.166282	1.00224	cellular response to heat [GO:0034605]; protein unfolding [GO:0043335]; response to oxidative stress [GO:0006979]	cytoplasm [GO:0005737]; cytosol [GO:0005829]	cytoplasm [GO:0005737]; cytosol [GO:0005829]; ATP binding [GO:0005524]; ATP-dependent peptidase activity [GO:0004176]; cellular response to heat [GO:0034605]; protein unfolding [GO:0043335]; response to oxidative stress [GO:0006979]	ATP binding [GO:0005524]; ATP-dependent peptidase activity [GO:0004176]
CLPB_ECOLI	P63284	Chaperone protein ClpB (Heat shock protein F84.1)	clpB	146	168	0.345228	-0.179218	cellular response to heat [GO:0034605]; protein refolding [GO:0042026]; response to heat [GO:0009408]	cytoplasm [GO:0005737]; cytosol [GO:0005829]; membrane [GO:0016020]	cytoplasm [GO:0005737]; cytosol [GO:0005829]; membrane [GO:0016020]; ATP binding [GO:0005524]; identical protein binding [GO:0042802]; cellular response to heat [GO:0034605]; protein refolding [GO:0042026]; response to heat [GO:0009408]	ATP binding [GO:0005524]; identical protein binding [GO:0042802]	SUBCELLULAR LOCATION: Cytoplasm {ECO:0000269|PubMed:8376377}.
CLPP_ECOLI	P0A6G7	ATP-dependent Clp protease proteolytic subunit (EC 3.4.21.92) (Caseinolytic protease) (Endopeptidase Clp) (Heat shock protein F21.5) (Protease Ti)	clpP	29	26	0.114427	0.199803	positive regulation of programmed cell death [GO:0043068]; proteasomal protein catabolic process [GO:0010498]; protein quality control for misfolded or incompletely synthesized proteins [GO:0006515]; proteolysis [GO:0006508]; response to heat [GO:0009408]; response to radiation [GO:0009314]; response to temperature stimulus [GO:0009266]	cytosol [GO:0005829]; endopeptidase Clp complex [GO:0009368]; HslUV protease complex [GO:0009376]; membrane [GO:0016020]	cytosol [GO:0005829]; endopeptidase Clp complex [GO:0009368]; HslUV protease complex [GO:0009376]; membrane [GO:0016020]; ATP-dependent peptidase activity [GO:0004176]; ATPase binding [GO:0051117]; identical protein binding [GO:0042802]; serine-type endopeptidase activity [GO:0004252]; serine-type peptidase activity [GO:0008236]; positive regulation of programmed cell death [GO:0043068]; proteaso…	ATPase binding [GO:0051117]; ATP-dependent peptidase activity [GO:0004176]; identical protein binding [GO:0042802]; serine-type endopeptidase activity [GO:0004252]; serine-type peptidase activity [GO:0008236]	SUBCELLULAR LOCATION: Cytoplasm.
CLPS_ECOLI	P0A8Q6	ATP-dependent Clp protease adapter protein ClpS	clpS	10	8	0.117679	0.376645	protein catabolic process [GO:0030163]; proteolysis [GO:0006508]; response to heat [GO:0009408]		chaperone binding [GO:0051087]; protein catabolic process [GO:0030163]; proteolysis [GO:0006508]; response to heat [GO:0009408]	chaperone binding [GO:0051087]
CLPX_ECOLI	P0A6H1	ATP-dependent Clp protease ATP-binding subunit ClpX (ATP-dependent unfoldase ClpX)	clpX	138	114	0.0859226	0.178042	cell division [GO:0051301]; protein catabolic process [GO:0030163]; protein denaturation [GO:0030164]; protein folding [GO:0006457]; protein unfolding [GO:0043335]; proteolysis [GO:0006508]	cytosol [GO:0005829]; HslUV protease complex [GO:0009376]	cytosol [GO:0005829]; HslUV protease complex [GO:0009376]; ATP binding [GO:0005524]; ATP-dependent peptidase activity [GO:0004176]; disordered domain specific binding [GO:0097718]; identical protein binding [GO:0042802]; protease binding [GO:0002020]; protein dimerization activity [GO:0046983]; unfolded protein binding [GO:0051082]; zinc ion binding [GO:0008270]; cell division [GO:0051301]; prote…	ATP binding [GO:0005524]; ATP-dependent peptidase activity [GO:0004176]; disordered domain specific binding [GO:0097718]; identical protein binding [GO:0042802]; protease binding [GO:0002020]; protein dimerization activity [GO:0046983]; unfolded protein binding [GO:0051082]; zinc ion binding [GO:0008270]
CLSA_ECOLI	P0A6H8	Cardiolipin synthase A (CL synthase) (EC 2.7.8.-)	clsA	10	15	0.00367797	0.0522322	cardiolipin biosynthetic process [GO:0032049]	integral component of membrane [GO:0016021]; membrane [GO:0016020]; plasma membrane [GO:0005886]	integral component of membrane [GO:0016021]; membrane [GO:0016020]; plasma membrane [GO:0005886]; cardiolipin synthase activity [GO:0008808]; cardiolipin biosynthetic process [GO:0032049]	cardiolipin synthase activity [GO:0008808]	SUBCELLULAR LOCATION: Cell inner membrane {ECO:0000255|HAMAP-Rule:MF_00190, ECO:0000269|PubMed:15919996, ECO:0000269|PubMed:1663113, ECO:0000269|PubMed:19341704}; Multi-pass membrane protein {ECO:0000255|HAMAP-Rule:MF_00190, ECO:0000269|PubMed:15919996, ECO:0000269|PubMed:1663113}.
CLSB_ECOLI	P0AA84	Cardiolipin synthase B (CL synthase) (EC 2.7.8.-)	clsB	2	1	-0.0135331	-0.469231	cardiolipin biosynthetic process [GO:0032049]	membrane [GO:0016020]; plasma membrane [GO:0005886]	membrane [GO:0016020]; plasma membrane [GO:0005886]; cardiolipin synthase activity [GO:0008808]; phospholipase D activity [GO:0004630]; cardiolipin biosynthetic process [GO:0032049]	cardiolipin synthase activity [GO:0008808]; phospholipase D activity [GO:0004630]	SUBCELLULAR LOCATION: Cell membrane {ECO:0000305|PubMed:10634942}; Peripheral membrane protein {ECO:0000305|PubMed:10634942}.
CMOA_ECOLI	P76290	Carboxy-S-adenosyl-L-methionine synthase (Cx-SAM synthase) (EC 2.1.3.-)	cmoA	33	34	0.0278568	0.166601	tRNA wobble uridine modification [GO:0002098]	cytosol [GO:0005829]	cytosol [GO:0005829]; carboxyl- or carbamoyltransferase activity [GO:0016743]; S-adenosyl-L-methionine binding [GO:1904047]; tRNA wobble uridine modification [GO:0002098]	carboxyl- or carbamoyltransferase activity [GO:0016743]; S-adenosyl-L-methionine binding [GO:1904047]
CMOB_ECOLI	P76291	tRNA U34 carboxymethyltransferase (EC 2.5.1.-)	cmoB	20	11	-0.0760547	0.236708	tRNA wobble uridine modification [GO:0002098]	protein-containing complex [GO:0032991]	protein-containing complex [GO:0032991]; identical protein binding [GO:0042802]; transferase activity, transferring alkyl or aryl (other than methyl) groups [GO:0016765]; tRNA wobble uridine modification [GO:0002098]	identical protein binding [GO:0042802]; transferase activity, transferring alkyl or aryl (other than methyl) groups [GO:0016765]
CMOM_ECOLI	P36566	tRNA 5-carboxymethoxyuridine methyltransferase (EC 2.1.1.-) (cmo5U methyltransferase)	cmoM	15	11	0.0898456	0.708154	tRNA methylation [GO:0030488]; tRNA wobble uridine modification [GO:0002098]		tRNA 5-carboxymethoxyuridine methyltransferase activity [GO:0097697]; tRNA methylation [GO:0030488]; tRNA wobble uridine modification [GO:0002098]	tRNA 5-carboxymethoxyuridine methyltransferase activity [GO:0097697]
CMPDT_ECOLI	P0A9J8	Bifunctional chorismate mutase/prephenate dehydratase (Chorismate mutase-prephenate dehydratase) (P-protein) [Includes: Chorismate mutase (CM) (EC 5.4.99.5); Prephenate dehydratase (PDT) (EC 4.2.1.51)]	pheA	20	19	0.0364349	-0.836027	chorismate metabolic process [GO:0046417]; L-phenylalanine biosynthetic process [GO:0009094]; tyrosine biosynthetic process [GO:0006571]	cytoplasm [GO:0005737]	cytoplasm [GO:0005737]; chorismate mutase activity [GO:0004106]; prephenate dehydratase activity [GO:0004664]; chorismate metabolic process [GO:0046417]; L-phenylalanine biosynthetic process [GO:0009094]; tyrosine biosynthetic process [GO:0006571]	chorismate mutase activity [GO:0004106]; prephenate dehydratase activity [GO:0004664]	SUBCELLULAR LOCATION: Cytoplasm {ECO:0000305}.
CNOX_ECOLI	P77395	Chaperedoxin (Heat shock protein CnoX) (Trxsc)	cnoX	83	74	0.136941	0.356537	cellular response to oxidative stress [GO:0034599]; chaperone-mediated protein folding [GO:0061077]; maintenance of unfolded protein [GO:0036506]; protein refolding [GO:0042026]	cytosol [GO:0005829]	cytosol [GO:0005829]; unfolded protein binding [GO:0051082]; cellular response to oxidative stress [GO:0034599]; chaperone-mediated protein folding [GO:0061077]; maintenance of unfolded protein [GO:0036506]; protein refolding [GO:0042026]	unfolded protein binding [GO:0051082]
CNU_ECOLI	P64467	OriC-binding nucleoid-associated protein (H-NS/StpA-binding protein 2) (Transcription modulator YdgT)	cnu	5	8	0.0296015	-0.414315	negative regulation of single-species biofilm formation on inanimate substrate [GO:1900232]; positive regulation of DNA-templated transcription, termination [GO:0060566]		DNA binding [GO:0003677]; negative regulation of single-species biofilm formation on inanimate substrate [GO:1900232]; positive regulation of DNA-templated transcription, termination [GO:0060566]	DNA binding [GO:0003677]
COAA_ECOLI	P0A6I3	Pantothenate kinase (EC 2.7.1.33) (Pantothenic acid kinase) (Rts protein)	coaA	14	15	-0.0308068	-0.803652	coenzyme A biosynthetic process [GO:0015937]	cytoplasm [GO:0005737]	cytoplasm [GO:0005737]; ATP binding [GO:0005524]; pantetheine kinase activity [GO:0050165]; pantothenate kinase activity [GO:0004594]; coenzyme A biosynthetic process [GO:0015937]	ATP binding [GO:0005524]; pantetheine kinase activity [GO:0050165]; pantothenate kinase activity [GO:0004594]	SUBCELLULAR LOCATION: Cytoplasm {ECO:0000305}.
COABC_ECOLI	P0ABQ0	Coenzyme A biosynthesis bifunctional protein CoaBC (DNA/pantothenate metabolism flavoprotein) (Phosphopantothenoylcysteine synthetase/decarboxylase) (PPCS-PPCDC) [Includes: Phosphopantothenoylcysteine decarboxylase (PPC decarboxylase) (PPC-DC) (EC 4.1.1.36) (CoaC); Phosphopantothenate--cysteine ligase (EC 6.3.2.5) (CoaB) (Phosphopantothenoylcysteine synthetase) (PPC synthetase) (PPC-S)]	coaBC	27	29	0.0068822	0.0251312	coenzyme A biosynthetic process [GO:0015937]; pantothenate catabolic process [GO:0015941]	cytosol [GO:0005829]; phosphopantothenoylcysteine decarboxylase complex [GO:0071513]	cytosol [GO:0005829]; phosphopantothenoylcysteine decarboxylase complex [GO:0071513]; FMN binding [GO:0010181]; identical protein binding [GO:0042802]; metal ion binding [GO:0046872]; phosphopantothenate--cysteine ligase activity [GO:0004632]; phosphopantothenoylcysteine decarboxylase activity [GO:0004633]; coenzyme A biosynthetic process [GO:0015937]; pantothenate catabolic process [GO:0015941]	FMN binding [GO:0010181]; identical protein binding [GO:0042802]; metal ion binding [GO:0046872]; phosphopantothenate--cysteine ligase activity [GO:0004632]; phosphopantothenoylcysteine decarboxylase activity [GO:0004633]
COAD_ECOLI	P0A6I6	Phosphopantetheine adenylyltransferase (EC 2.7.7.3) (Dephospho-CoA pyrophosphorylase) (Pantetheine-phosphate adenylyltransferase) (PPAT)	coaD	6	8	-0.0383602	0.0100194	coenzyme A biosynthetic process [GO:0015937]	cytoplasm [GO:0005737]	cytoplasm [GO:0005737]; ATP binding [GO:0005524]; identical protein binding [GO:0042802]; pantetheine-phosphate adenylyltransferase activity [GO:0004595]; coenzyme A biosynthetic process [GO:0015937]	ATP binding [GO:0005524]; identical protein binding [GO:0042802]; pantetheine-phosphate adenylyltransferase activity [GO:0004595]	SUBCELLULAR LOCATION: Cytoplasm {ECO:0000255|HAMAP-Rule:MF_00151}.
COAE_ECOLI	P0A6I9	Dephospho-CoA kinase (EC 2.7.1.24) (Dephosphocoenzyme A kinase)	coaE	8	4	0.0474843	-0.205989	coenzyme A biosynthetic process [GO:0015937]	cytoplasm [GO:0005737]	cytoplasm [GO:0005737]; ATP binding [GO:0005524]; dephospho-CoA kinase activity [GO:0004140]; coenzyme A biosynthetic process [GO:0015937]	ATP binding [GO:0005524]; dephospho-CoA kinase activity [GO:0004140]	SUBCELLULAR LOCATION: Cytoplasm {ECO:0000255|HAMAP-Rule:MF_00376, ECO:0000305}.
COBT_ECOLI	P36562	Nicotinate-nucleotide--dimethylbenzimidazole phosphoribosyltransferase (NN:DBI PRT) (EC 2.4.2.21) (N(1)-alpha-phosphoribosyltransferase)	cobT	7	6	-0.0339604	-0.694253	cobalamin biosynthetic process [GO:0009236]		nicotinate-nucleotide-dimethylbenzimidazole phosphoribosyltransferase activity [GO:0008939]; cobalamin biosynthetic process [GO:0009236]	nicotinate-nucleotide-dimethylbenzimidazole phosphoribosyltransferase activity [GO:0008939]
CODA_ECOLI	P25524	Cytosine deaminase (CD) (CDA) (CDase) (EC 3.5.4.1) (Cytosine aminohydrolase) (Isoguanine deaminase) (EC 3.5.4.-)	codA	79	49	-0.0334013	-0.028217	cytosine catabolic process [GO:0006209]	cytosol [GO:0005829]	cytosol [GO:0005829]; 5-fluorocytosine deaminase activity [GO:0102480]; cytosine deaminase activity [GO:0004131]; ferrous iron binding [GO:0008198]; hydrolase activity, acting on carbon-nitrogen (but not peptide) bonds, in cyclic amidines [GO:0016814]; identical protein binding [GO:0042802]; isoguanine deaminase activity [GO:0035888]; zinc ion binding [GO:0008270]; cytosine catabolic process [GO:…	5-fluorocytosine deaminase activity [GO:0102480]; cytosine deaminase activity [GO:0004131]; ferrous iron binding [GO:0008198]; hydrolase activity, acting on carbon-nitrogen (but not peptide) bonds, in cyclic amidines [GO:0016814]; identical protein binding [GO:0042802]; isoguanine deaminase activity [GO:0035888]; zinc ion binding [GO:0008270]
CODB_ECOLI	P0AA82	Cytosine permease	codB	14	8	0.0257308	-0.0481049	cytosine metabolic process [GO:0019858]; cytosine transport [GO:0015856]; proton transmembrane transport [GO:1902600]	integral component of membrane [GO:0016021]; membrane [GO:0016020]; plasma membrane [GO:0005886]	integral component of membrane [GO:0016021]; membrane [GO:0016020]; plasma membrane [GO:0005886]; cytosine transmembrane transporter activity [GO:0015209]; cytosine metabolic process [GO:0019858]; cytosine transport [GO:0015856]; proton transmembrane transport [GO:1902600]	cytosine transmembrane transporter activity [GO:0015209]	SUBCELLULAR LOCATION: Cell inner membrane; Multi-pass membrane protein.
COHE_ECOLI	P75974	Prophage repressor CohE (Putative lambdoid prophage e14 repressor protein C2)	cohE	7	7	-0.0102799	-0.0892587			DNA binding [GO:0003677]	DNA binding [GO:0003677]
COMR_ECOLI	P75952	HTH-type transcriptional repressor ComR (Copper outer membrane regulator)	comR	2	5	-0.00196938	0.118472	negative regulation of transcription, DNA-templated [GO:0045892]; regulation of transcription, DNA-templated [GO:0006355]; response to copper ion [GO:0046688]		DNA binding [GO:0003677]; DNA-binding transcription factor activity [GO:0003700]; transcription cis-regulatory region binding [GO:0000976]; negative regulation of transcription, DNA-templated [GO:0045892]; regulation of transcription, DNA-templated [GO:0006355]; response to copper ion [GO:0046688]	DNA binding [GO:0003677]; DNA-binding transcription factor activity [GO:0003700]; transcription cis-regulatory region binding [GO:0000976]
COPA_ECOLI	Q59385	Copper-exporting P-type ATPase (EC 7.2.2.8) (Copper-exporting P-type ATPase A) (Cu(+)-exporting ATPase) (Soluble copper chaperone CopA(Z))	copA	14	33	0.0323133	-0.132317	cellular response to copper ion [GO:0071280]; cellular response to silver ion [GO:0071292]; copper ion export [GO:0060003]; copper ion transport [GO:0006825]; detoxification of copper ion [GO:0010273]; silver ion transmembrane transport [GO:1902601]	cytoplasm [GO:0005737]; integral component of membrane [GO:0016021]; integral component of plasma membrane [GO:0005887]; membrane [GO:0016020]; plasma membrane [GO:0005886]	cytoplasm [GO:0005737]; integral component of membrane [GO:0016021]; integral component of plasma membrane [GO:0005887]; membrane [GO:0016020]; plasma membrane [GO:0005886]; ATP binding [GO:0005524]; metal ion binding [GO:0046872]; P-type divalent copper transporter activity [GO:0043682]; P-type ion transporter activity [GO:0015662]; P-type monovalent copper transporter activity [GO:0140581]; sil…	ATP binding [GO:0005524]; metal ion binding [GO:0046872]; P-type divalent copper transporter activity [GO:0043682]; P-type ion transporter activity [GO:0015662]; P-type monovalent copper transporter activity [GO:0140581]; silver ion transmembrane transporter activity [GO:0015080]	SUBCELLULAR LOCATION: [Copper-exporting P-type ATPase]: Cell inner membrane {ECO:0000269|PubMed:15919996, ECO:0000305|PubMed:12351646}; Multi-pass membrane protein {ECO:0000305|PubMed:15919996}.; SUBCELLULAR LOCATION: [Isoform Soluble copper chaperone CopA(Z)]: Cytoplasm {ECO:0000305|PubMed:28107647}.
CORA_ECOLI	P0ABI4	Magnesium transport protein CorA	corA	15	20	-0.029405	0.385642	cobalt ion transport [GO:0006824]; magnesium ion transport [GO:0015693]; nickel cation transmembrane transport [GO:0035444]	integral component of membrane [GO:0016021]; plasma membrane [GO:0005886]	integral component of membrane [GO:0016021]; plasma membrane [GO:0005886]; cobalt ion transmembrane transporter activity [GO:0015087]; magnesium ion transmembrane transporter activity [GO:0015095]; nickel cation transmembrane transporter activity [GO:0015099]; cobalt ion transport [GO:0006824]; magnesium ion transport [GO:0015693]; nickel cation transmembrane transport [GO:0035444]	cobalt ion transmembrane transporter activity [GO:0015087]; magnesium ion transmembrane transporter activity [GO:0015095]; nickel cation transmembrane transporter activity [GO:0015099]	SUBCELLULAR LOCATION: Cell inner membrane {ECO:0000305|PubMed:780341}; Multi-pass membrane protein {ECO:0000250|UniProtKB:Q9WZ31}.
CORC_ECOLI	P0AE78	Magnesium and cobalt efflux protein CorC	corC	41	48	0.00713833	-0.248676		plasma membrane [GO:0005886]	plasma membrane [GO:0005886]; flavin adenine dinucleotide binding [GO:0050660]	flavin adenine dinucleotide binding [GO:0050660]
CPDA_ECOLI	P0AEW4	3',5'-cyclic adenosine monophosphate phosphodiesterase CpdA (3',5'-cyclic AMP phosphodiesterase) (cAMP phosphodiesterase) (EC 3.1.4.53)	cpdA	7	14	0.00456563	-0.465492	cell wall modification [GO:0042545]		3',5'-cyclic-AMP phosphodiesterase activity [GO:0004115]; ferrous iron binding [GO:0008198]; nucleotide binding [GO:0000166]; cell wall modification [GO:0042545]	3',5'-cyclic-AMP phosphodiesterase activity [GO:0004115]; ferrous iron binding [GO:0008198]; nucleotide binding [GO:0000166]
CPDB_ECOLI	P08331	2',3'-cyclic-nucleotide 2'-phosphodiesterase/3'-nucleotidase (EC 3.1.3.6) (EC 3.1.4.16)	cpdB	62	65	-0.0743627	-0.427437	cellular response to DNA damage stimulus [GO:0006974]; nucleotide catabolic process [GO:0009166]	outer membrane-bounded periplasmic space [GO:0030288]; periplasmic space [GO:0042597]	outer membrane-bounded periplasmic space [GO:0030288]; periplasmic space [GO:0042597]; 2',3'-cyclic-nucleotide 2'-phosphodiesterase activity [GO:0008663]; 3'-nucleotidase activity [GO:0008254]; metal ion binding [GO:0046872]; nucleotide binding [GO:0000166]; cellular response to DNA damage stimulus [GO:0006974]; nucleotide catabolic process [GO:0009166]	2',3'-cyclic-nucleotide 2'-phosphodiesterase activity [GO:0008663]; 3'-nucleotidase activity [GO:0008254]; metal ion binding [GO:0046872]; nucleotide binding [GO:0000166]	SUBCELLULAR LOCATION: Periplasm {ECO:0000269|PubMed:3005231}.
CPOB_ECOLI	P45955	Cell division coordinator CpoB	cpoB	82	64	0.00948137	0.209022	cell division [GO:0051301]; FtsZ-dependent cytokinesis [GO:0043093]; protein trimerization [GO:0070206]	outer membrane-bounded periplasmic space [GO:0030288]; protein-containing complex [GO:0032991]	outer membrane-bounded periplasmic space [GO:0030288]; protein-containing complex [GO:0032991]; cell division [GO:0051301]; FtsZ-dependent cytokinesis [GO:0043093]; protein trimerization [GO:0070206]		SUBCELLULAR LOCATION: Periplasm {ECO:0000255|HAMAP-Rule:MF_02066, ECO:0000269|PubMed:8763928}. Note=Targeting to the Sec-translocase for transport across the inner membrane is SecB-dependent (PubMed:16352602). Localizes to the septum concurrent with PBP1B-LpoB and Tol at the onset of constriction (PubMed:25951518). Localization is dependent on divisome assembly and requires ongoing septal peptido…
CPXA_ECOLI	P0AE82	Sensor histidine kinase CpxA (EC 2.7.13.3)	cpxA	9	14	-0.147705	-0.196307	cell adhesion involved in biofilm formation [GO:0043708]; cellular response to cell envelope stress [GO:0036460]; peptidyl-histidine phosphorylation [GO:0018106]; protein autophosphorylation [GO:0046777]; response to radiation [GO:0009314]	cytosol [GO:0005829]; integral component of membrane [GO:0016021]; integral component of plasma membrane [GO:0005887]; outer membrane-bounded periplasmic space [GO:0030288]; plasma membrane [GO:0005886]	cytosol [GO:0005829]; integral component of membrane [GO:0016021]; integral component of plasma membrane [GO:0005887]; outer membrane-bounded periplasmic space [GO:0030288]; plasma membrane [GO:0005886]; ATP binding [GO:0005524]; identical protein binding [GO:0042802]; phosphoprotein phosphatase activity [GO:0004721]; phosphorelay sensor kinase activity [GO:0000155]; cell adhesion involved in bio…	ATP binding [GO:0005524]; identical protein binding [GO:0042802]; phosphoprotein phosphatase activity [GO:0004721]; phosphorelay sensor kinase activity [GO:0000155]	SUBCELLULAR LOCATION: Cell inner membrane {ECO:0000269|PubMed:15919996, ECO:0000269|PubMed:25207645, ECO:0000269|PubMed:3058985}; Multi-pass membrane protein {ECO:0000305|PubMed:15919996, ECO:0000305|PubMed:3058985}.
CPXP_ECOLI	P0AE85	Periplasmic protein CpxP (ORF_o167) (Periplasmic accessory protein CpxP)	cpxP	12	12	-0.195279	-0.108602	ATP-independent chaperone mediated protein folding [GO:1990507]	outer membrane-bounded periplasmic space [GO:0030288]	outer membrane-bounded periplasmic space [GO:0030288]; identical protein binding [GO:0042802]; unfolded protein binding [GO:0051082]; ATP-independent chaperone mediated protein folding [GO:1990507]	identical protein binding [GO:0042802]; unfolded protein binding [GO:0051082]	SUBCELLULAR LOCATION: Periplasm {ECO:0000269|PubMed:25207645, ECO:0000269|PubMed:9473036}.
CPXR_ECOLI	P0AE88	Transcriptional regulatory protein CpxR	cpxR	26	28	-0.162803	-0.170394	cell adhesion [GO:0007155]; negative regulation of transcription, DNA-templated [GO:0045892]; positive regulation of transcription, DNA-templated [GO:0045893]; regulation of cell-substrate adhesion [GO:0010810]	cytosol [GO:0005829]; protein-DNA complex [GO:0032993]	cytosol [GO:0005829]; protein-DNA complex [GO:0032993]; DNA-binding transcription activator activity [GO:0001216]; DNA-binding transcription factor activity [GO:0003700]; phosphorelay response regulator activity [GO:0000156]; transcription cis-regulatory region binding [GO:0000976]; cell adhesion [GO:0007155]; negative regulation of transcription, DNA-templated [GO:0045892]; positive regulation o…	DNA-binding transcription activator activity [GO:0001216]; DNA-binding transcription factor activity [GO:0003700]; phosphorelay response regulator activity [GO:0000156]; transcription cis-regulatory region binding [GO:0000976]	SUBCELLULAR LOCATION: Cytoplasm {ECO:0000305}.
CRA_ECOLI	P0ACP1	Catabolite repressor/activator (Fructose repressor)	cra	20	15	0.0172563	-0.968117	regulation of DNA-templated transcription, initiation [GO:2000142]; regulation of transcription, DNA-templated [GO:0006355]; response to fructose [GO:0009750]		bacterial-type cis-regulatory region sequence-specific DNA binding [GO:0000986]; DNA-binding transcription factor activity [GO:0003700]; identical protein binding [GO:0042802]; transcription cis-regulatory region binding [GO:0000976]; regulation of DNA-templated transcription, initiation [GO:2000142]; regulation of transcription, DNA-templated [GO:0006355]; response to fructose [GO:0009750]	bacterial-type cis-regulatory region sequence-specific DNA binding [GO:0000986]; DNA-binding transcription factor activity [GO:0003700]; identical protein binding [GO:0042802]; transcription cis-regulatory region binding [GO:0000976]
CREA_ECOLI	P0AE91	Protein CreA (Catabolite regulation protein A)	creA	26	21	0.0487271	-0.155433		cytosol [GO:0005829]	cytosol [GO:0005829]
CREB_ECOLI	P08368	Transcriptional regulatory protein CreB	creB	2	4	-0.034761	-0.554551	positive regulation of transcription, DNA-templated [GO:0045893]	cytosol [GO:0005829]; protein-DNA complex [GO:0032993]	cytosol [GO:0005829]; protein-DNA complex [GO:0032993]; bacterial-type cis-regulatory region sequence-specific DNA binding [GO:0000986]; DNA-binding transcription activator activity [GO:0001216]; identical protein binding [GO:0042802]; phosphorelay response regulator activity [GO:0000156]; transcription cis-regulatory region binding [GO:0000976]; positive regulation of transcription, DNA-template…	bacterial-type cis-regulatory region sequence-specific DNA binding [GO:0000986]; DNA-binding transcription activator activity [GO:0001216]; identical protein binding [GO:0042802]; phosphorelay response regulator activity [GO:0000156]; transcription cis-regulatory region binding [GO:0000976]	SUBCELLULAR LOCATION: Cytoplasm {ECO:0000305}.
CREC_ECOLI	P08401	Sensor protein CreC (EC 2.7.13.3)	creC	2	1	0.133153	-0.226377	glycolytic fermentation [GO:0019660]; peptidyl-histidine phosphorylation [GO:0018106]; protein autophosphorylation [GO:0046777]	integral component of plasma membrane [GO:0005887]; plasma membrane [GO:0005886]	integral component of plasma membrane [GO:0005887]; plasma membrane [GO:0005886]; ATP binding [GO:0005524]; phosphorelay sensor kinase activity [GO:0000155]; glycolytic fermentation [GO:0019660]; peptidyl-histidine phosphorylation [GO:0018106]; protein autophosphorylation [GO:0046777]	ATP binding [GO:0005524]; phosphorelay sensor kinase activity [GO:0000155]	SUBCELLULAR LOCATION: Cell inner membrane; Multi-pass membrane protein.
CRL_ECOLI	P24251	Sigma factor-binding protein Crl (Curlin genes transcriptional activatory protein)	crl	50	32	-0.0393608	-0.0401132	positive regulation of transcription, DNA-templated [GO:0045893]	cytoplasm [GO:0005737]	cytoplasm [GO:0005737]; positive regulation of transcription, DNA-templated [GO:0045893]		SUBCELLULAR LOCATION: Cytoplasm.
CRP_ECOLI	P0ACJ8	cAMP-activated global transcriptional regulator CRP (Catabolite activator protein) (CAP) (Catabolite gene activator) (cAMP receptor protein) (CRP) (cAMP regulatory protein)	crp	92	70	-0.0176496	-0.135341	carbon catabolite repression of transcription [GO:0045013]; negative regulation of transcription, DNA-templated [GO:0045892]; positive regulation of transcription, DNA-templated [GO:0045893]; transcription, DNA-templated [GO:0006351]	cytosol [GO:0005829]; protein-DNA complex [GO:0032993]	cytosol [GO:0005829]; protein-DNA complex [GO:0032993]; cAMP binding [GO:0030552]; DNA binding, bending [GO:0008301]; DNA-binding transcription factor activity [GO:0003700]; identical protein binding [GO:0042802]; minor groove of adenine-thymine-rich DNA binding [GO:0003680]; sequence-specific DNA binding [GO:0043565]; carbon catabolite repression of transcription [GO:0045013]; negative regulatio…	cAMP binding [GO:0030552]; DNA binding, bending [GO:0008301]; DNA-binding transcription factor activity [GO:0003700]; identical protein binding [GO:0042802]; minor groove of adenine-thymine-rich DNA binding [GO:0003680]; sequence-specific DNA binding [GO:0043565]
CSDA_ECOLI	Q46925	Cysteine desulfurase CsdA (EC 2.8.1.7) (Cysteine sulfinate desulfinase) (CSD) (EC 4.4.1.-) (Selenocysteine lyase) (EC 4.4.1.16)	csdA	15	16	0.0293738	0.530938	iron-sulfur cluster assembly [GO:0016226]; sulfur amino acid metabolic process [GO:0000096]		cysteine desulfurase activity [GO:0031071]; pyridoxal phosphate binding [GO:0030170]; selenocysteine lyase activity [GO:0009000]; sulfurtransferase activity [GO:0016783]; iron-sulfur cluster assembly [GO:0016226]; sulfur amino acid metabolic process [GO:0000096]	cysteine desulfurase activity [GO:0031071]; pyridoxal phosphate binding [GO:0030170]; selenocysteine lyase activity [GO:0009000]; sulfurtransferase activity [GO:0016783]
CSDE_ECOLI	P0AGF2	Sulfur acceptor protein CsdE	csdE	8	14	0.0591872	0.115032	cyclic threonylcarbamoyladenosine biosynthetic process [GO:0061504]		sulfur carrier activity [GO:0097163]; cyclic threonylcarbamoyladenosine biosynthetic process [GO:0061504]	sulfur carrier activity [GO:0097163]
CSGG_ECOLI	P0AEA2	Curli production assembly/transport component CsgG	csgG	1	3	0.00357547	-0.192735	biological adhesion [GO:0022610]; protein transmembrane transport [GO:0071806]; single-species biofilm formation [GO:0044010]	cell outer membrane [GO:0009279]; intrinsic component of periplasmic side of cell outer membrane [GO:0031246]; outer membrane-bounded periplasmic space [GO:0030288]; plasma membrane [GO:0005886]	cell outer membrane [GO:0009279]; intrinsic component of periplasmic side of cell outer membrane [GO:0031246]; outer membrane-bounded periplasmic space [GO:0030288]; plasma membrane [GO:0005886]; identical protein binding [GO:0042802]; biological adhesion [GO:0022610]; protein transmembrane transport [GO:0071806]; single-species biofilm formation [GO:0044010]	identical protein binding [GO:0042802]	SUBCELLULAR LOCATION: Cell membrane {ECO:0000255|PROSITE-ProRule:PRU00303}; Lipid-anchor {ECO:0000255|PROSITE-ProRule:PRU00303}.
CSIE_ECOLI	P54901	Stationary phase-inducible protein CsiE	csiE	1	4	0.0957276	-0.955829	regulation of transcription, DNA-templated [GO:0006355]		regulation of transcription, DNA-templated [GO:0006355]
CSPA_ECOLI	P0A9X9	Cold shock protein CspA (CSP-A) (7.4 kDa cold shock protein) (CS7.4)	cspA	39	39	0.026893	-0.741351	negative regulation of DNA-templated transcription, termination [GO:0060567]; regulation of gene expression [GO:0010468]; response to cold [GO:0009409]; transcription, DNA-templated [GO:0006351]	cytosol [GO:0005829]	cytosol [GO:0005829]; DNA binding [GO:0003677]; nucleic acid binding [GO:0003676]; RNA binding [GO:0003723]; single-stranded DNA binding [GO:0003697]; single-stranded RNA binding [GO:0003727]; transcription antitermination factor activity, RNA binding [GO:0001072]; negative regulation of DNA-templated transcription, termination [GO:0060567]; regulation of gene expression [GO:0010468]; response to…	DNA binding [GO:0003677]; nucleic acid binding [GO:0003676]; RNA binding [GO:0003723]; single-stranded DNA binding [GO:0003697]; single-stranded RNA binding [GO:0003727]; transcription antitermination factor activity, RNA binding [GO:0001072]	SUBCELLULAR LOCATION: Cytoplasm {ECO:0000269|PubMed:2404279}.
CSPB_ECOLI	P36995	Cold shock-like protein CspB (CSP-B)	cspB	25	18	0.05658	-0.533824	negative regulation of DNA-templated transcription, termination [GO:0060567]; regulation of gene expression [GO:0010468]; response to cold [GO:0009409]	cytosol [GO:0005829]	cytosol [GO:0005829]; nucleic acid binding [GO:0003676]; RNA binding [GO:0003723]; single-stranded DNA binding [GO:0003697]; transcription antitermination factor activity, RNA binding [GO:0001072]; negative regulation of DNA-templated transcription, termination [GO:0060567]; regulation of gene expression [GO:0010468]; response to cold [GO:0009409]	nucleic acid binding [GO:0003676]; RNA binding [GO:0003723]; single-stranded DNA binding [GO:0003697]; transcription antitermination factor activity, RNA binding [GO:0001072]	SUBCELLULAR LOCATION: Cytoplasm {ECO:0000250}.
CSPC_ECOLI	P0A9Y6	Cold shock-like protein CspC (CSP-C)	cspC	47	29	0.0911147	-0.227784	negative regulation of DNA-templated transcription, termination [GO:0060567]; regulation of gene expression [GO:0010468]	cytosol [GO:0005829]; membrane [GO:0016020]	cytosol [GO:0005829]; membrane [GO:0016020]; chaperone binding [GO:0051087]; nucleic acid binding [GO:0003676]; RNA binding [GO:0003723]; single-stranded DNA binding [GO:0003697]; transcription antitermination factor activity, RNA binding [GO:0001072]; negative regulation of DNA-templated transcription, termination [GO:0060567]; regulation of gene expression [GO:0010468]	chaperone binding [GO:0051087]; nucleic acid binding [GO:0003676]; RNA binding [GO:0003723]; single-stranded DNA binding [GO:0003697]; transcription antitermination factor activity, RNA binding [GO:0001072]	SUBCELLULAR LOCATION: Cytoplasm {ECO:0000250}.
CSPD_ECOLI	P0A968	Cold shock-like protein CspD (CSP-D)	cspD	11	1	0.0660902	-2.45847	negative regulation of DNA replication [GO:0008156]; regulation of gene expression [GO:0010468]; regulation of transcription, DNA-templated [GO:0006355]; response to starvation [GO:0042594]	cytosol [GO:0005829]	cytosol [GO:0005829]; nucleic acid binding [GO:0003676]; RNA binding [GO:0003723]; single-stranded DNA binding [GO:0003697]; toxin activity [GO:0090729]; negative regulation of DNA replication [GO:0008156]; regulation of gene expression [GO:0010468]; regulation of transcription, DNA-templated [GO:0006355]; response to starvation [GO:0042594]	nucleic acid binding [GO:0003676]; RNA binding [GO:0003723]; single-stranded DNA binding [GO:0003697]; toxin activity [GO:0090729]	SUBCELLULAR LOCATION: Cytoplasm.
CSPE_ECOLI	P0A972	Cold shock-like protein CspE (CSP-E)	cspE	37	28	0.0238046	-0.559205	negative regulation of DNA-templated transcription, termination [GO:0060567]; regulation of gene expression [GO:0010468]	cytosol [GO:0005829]	cytosol [GO:0005829]; nucleic acid binding [GO:0003676]; poly(A) binding [GO:0008143]; RNA binding [GO:0003723]; single-stranded DNA binding [GO:0003697]; transcription antitermination factor activity, RNA binding [GO:0001072]; negative regulation of DNA-templated transcription, termination [GO:0060567]; regulation of gene expression [GO:0010468]	nucleic acid binding [GO:0003676]; poly(A) binding [GO:0008143]; RNA binding [GO:0003723]; single-stranded DNA binding [GO:0003697]; transcription antitermination factor activity, RNA binding [GO:0001072]	SUBCELLULAR LOCATION: Cytoplasm {ECO:0000250}.
CSPG_ECOLI	P0A978	Cold shock-like protein CspG (CPS-G)	cspG	4	2	0.101705	-1.05242	negative regulation of DNA-templated transcription, termination [GO:0060567]; regulation of gene expression [GO:0010468]; response to cold [GO:0009409]	cytosol [GO:0005829]	cytosol [GO:0005829]; DNA binding [GO:0003677]; nucleic acid binding [GO:0003676]; RNA binding [GO:0003723]; transcription antitermination factor activity, RNA binding [GO:0001072]; negative regulation of DNA-templated transcription, termination [GO:0060567]; regulation of gene expression [GO:0010468]; response to cold [GO:0009409]	DNA binding [GO:0003677]; nucleic acid binding [GO:0003676]; RNA binding [GO:0003723]; transcription antitermination factor activity, RNA binding [GO:0001072]	SUBCELLULAR LOCATION: Cytoplasm {ECO:0000250}.
CSQR_ECOLI	P32144	HTH-type transcriptional repressor CsqR (Regulator of sulfoquinovose catabolism)	csqR	9	12	0.00614768	-0.289881	negative regulation of DNA-templated transcription, initiation [GO:2000143]		DNA binding [GO:0003677]; DNA-binding transcription factor activity [GO:0003700]; negative regulation of DNA-templated transcription, initiation [GO:2000143]	DNA binding [GO:0003677]; DNA-binding transcription factor activity [GO:0003700]
CSRD_ECOLI	P13518	RNase E specificity factor CsrD (Regulator of CsrB and CsrC decay CsrD)	csrD	2	5	-0.0340672	-0.890981	ncRNA catabolic process [GO:0034661]; regulation of RNA metabolic process [GO:0051252]	integral component of membrane [GO:0016021]; plasma membrane [GO:0005886]; protein-containing complex [GO:0032991]	integral component of membrane [GO:0016021]; plasma membrane [GO:0005886]; protein-containing complex [GO:0032991]; identical protein binding [GO:0042802]; ncRNA catabolic process [GO:0034661]; regulation of RNA metabolic process [GO:0051252]	identical protein binding [GO:0042802]	SUBCELLULAR LOCATION: Cell membrane {ECO:0000305}; Multi-pass membrane protein {ECO:0000305}.
CSTA_ECOLI	P15078	Peptide transporter CstA (Carbon starvation protein A)	cstA	25	19	0.0851903	-1.19477	cellular response to nutrient levels [GO:0031669]; cellular response to starvation [GO:0009267]; peptide transport [GO:0015833]; protein transport [GO:0015031]	integral component of plasma membrane [GO:0005887]; plasma membrane [GO:0005886]	integral component of plasma membrane [GO:0005887]; plasma membrane [GO:0005886]; cellular response to nutrient levels [GO:0031669]; cellular response to starvation [GO:0009267]; peptide transport [GO:0015833]; protein transport [GO:0015031]		SUBCELLULAR LOCATION: Cell inner membrane {ECO:0000269|PubMed:15919996}; Multi-pass membrane protein {ECO:0000255}.
CUEO_ECOLI	P36649	Blue copper oxidase CueO (Copper efflux oxidase)	cueO	38	33	-0.0548958	-0.502623	detoxification of copper ion [GO:0010273]; response to copper ion [GO:0046688]	outer membrane-bounded periplasmic space [GO:0030288]; periplasmic space [GO:0042597]	outer membrane-bounded periplasmic space [GO:0030288]; periplasmic space [GO:0042597]; copper ion binding [GO:0005507]; ferroxidase activity [GO:0004322]; oxidoreductase activity [GO:0016491]; oxidoreductase activity, acting on diphenols and related substances as donors, oxygen as acceptor [GO:0016682]; oxidoreductase activity, acting on metal ions [GO:0016722]; oxidoreductase activity, acting on…	copper ion binding [GO:0005507]; ferroxidase activity [GO:0004322]; oxidoreductase activity [GO:0016491]; oxidoreductase activity, acting on diphenols and related substances as donors, oxygen as acceptor [GO:0016682]; oxidoreductase activity, acting on metal ions [GO:0016722]; oxidoreductase activity, acting on metal ions, oxygen as acceptor [GO:0016724]	SUBCELLULAR LOCATION: Periplasm. Note=It is exported via the Tat pathway.
CUER_ECOLI	P0A9G4	HTH-type transcriptional regulator CueR (Copper efflux regulator) (Copper export regulator)	cueR	2	5	0.0148952	-0.9092	positive regulation of transcription, DNA-templated [GO:0045893]; transcription, DNA-templated [GO:0006351]	cytoplasm [GO:0005737]; protein-DNA complex [GO:0032993]	cytoplasm [GO:0005737]; protein-DNA complex [GO:0032993]; bacterial-type cis-regulatory region sequence-specific DNA binding [GO:0000986]; copper ion binding [GO:0005507]; DNA-binding transcription activator activity [GO:0001216]; DNA-binding transcription factor activity [GO:0003700]; identical protein binding [GO:0042802]; transcription cis-regulatory region binding [GO:0000976]; positive regul…	bacterial-type cis-regulatory region sequence-specific DNA binding [GO:0000986]; copper ion binding [GO:0005507]; DNA-binding transcription activator activity [GO:0001216]; DNA-binding transcription factor activity [GO:0003700]; identical protein binding [GO:0042802]; transcription cis-regulatory region binding [GO:0000976]	SUBCELLULAR LOCATION: Cytoplasm {ECO:0000305}.
CURA_ECOLI	P76113	NADPH-dependent curcumin reductase (EC 1.3.1.n3) (NADPH-dependent curcumin/dihydrocurcumin reductase)	curA	32	24	-0.115855	-0.181819			oxidoreductase activity [GO:0016491]	oxidoreductase activity [GO:0016491]
CUSR_ECOLI	P0ACZ8	Transcriptional regulatory protein CusR	cusR	3	6	-0.0405391	0.173508	phosphorelay signal transduction system [GO:0000160]; positive regulation of gene expression [GO:0010628]; regulation of transcription, DNA-templated [GO:0006355]; response to copper ion [GO:0046688]	cytosol [GO:0005829]; protein-DNA complex [GO:0032993]	cytosol [GO:0005829]; protein-DNA complex [GO:0032993]; DNA binding [GO:0003677]; DNA-binding transcription activator activity [GO:0001216]; identical protein binding [GO:0042802]; phosphorelay response regulator activity [GO:0000156]; transcription cis-regulatory region binding [GO:0000976]; phosphorelay signal transduction system [GO:0000160]; positive regulation of gene expression [GO:0010628]…	DNA binding [GO:0003677]; DNA-binding transcription activator activity [GO:0001216]; identical protein binding [GO:0042802]; phosphorelay response regulator activity [GO:0000156]; transcription cis-regulatory region binding [GO:0000976]	SUBCELLULAR LOCATION: Cytoplasm {ECO:0000305}.
CUSS_ECOLI	P77485	Sensor histidine kinase CusS (EC 2.7.13.3)	cusS	1	1	-0.0159391	-0.262377	cellular response to copper ion [GO:0071280]; cellular response to silver ion [GO:0071292]; peptidyl-histidine phosphorylation [GO:0018106]; phosphorelay signal transduction system [GO:0000160]; phosphorylation [GO:0016310]	integral component of plasma membrane [GO:0005887]; membrane [GO:0016020]; plasma membrane [GO:0005886]	integral component of plasma membrane [GO:0005887]; membrane [GO:0016020]; plasma membrane [GO:0005886]; ATP binding [GO:0005524]; metal ion binding [GO:0046872]; phosphorelay sensor kinase activity [GO:0000155]; protein histidine kinase activity [GO:0004673]; cellular response to copper ion [GO:0071280]; cellular response to silver ion [GO:0071292]; peptidyl-histidine phosphorylation [GO:0018106…	ATP binding [GO:0005524]; metal ion binding [GO:0046872]; phosphorelay sensor kinase activity [GO:0000155]; protein histidine kinase activity [GO:0004673]	SUBCELLULAR LOCATION: Cell inner membrane {ECO:0000269|PubMed:15919996}; Multi-pass membrane protein {ECO:0000255}.
CUTA_ECOLI	P69488	Divalent-cation tolerance protein CutA (C-type cytochrome biogenesis protein CycY)	cutA	1	2	-0.392599	0.43999	response to copper ion [GO:0046688]	cytoplasm [GO:0005737]	cytoplasm [GO:0005737]; copper ion binding [GO:0005507]; metal ion binding [GO:0046872]; response to copper ion [GO:0046688]	copper ion binding [GO:0005507]; metal ion binding [GO:0046872]	SUBCELLULAR LOCATION: Cytoplasm {ECO:0000305|PubMed:7623666}.
CUTC_ECOLI	P67826	Copper homeostasis protein CutC	cutC	20	31	0.00867427	0.616775	cellular copper ion homeostasis [GO:0006878]; copper ion homeostasis [GO:0055070]	cytoplasm [GO:0005737]	cytoplasm [GO:0005737]; copper ion binding [GO:0005507]; cellular copper ion homeostasis [GO:0006878]; copper ion homeostasis [GO:0055070]	copper ion binding [GO:0005507]	SUBCELLULAR LOCATION: Cytoplasm {ECO:0000255|HAMAP-Rule:MF_00795, ECO:0000305}.
CYAA_ECOLI	P00936	Adenylate cyclase (EC 4.6.1.1) (ATP pyrophosphate-lyase) (Adenylyl cyclase)	cyaA	2	4	0.0136451	-0.768081	cAMP biosynthetic process [GO:0006171]	cytoplasm [GO:0005737]	cytoplasm [GO:0005737]; adenylate cyclase activity [GO:0004016]; ATP binding [GO:0005524]; cAMP biosynthetic process [GO:0006171]	adenylate cyclase activity [GO:0004016]; ATP binding [GO:0005524]	SUBCELLULAR LOCATION: Cytoplasm.
CYAY_ECOLI	P27838	Iron-sulfur cluster assembly protein CyaY (Bacterial frataxin ortholog)	cyaY	9	10	-0.112586	-0.186222	iron-sulfur cluster assembly [GO:0016226]	cytoplasm [GO:0005737]; cytosol [GO:0005829]	cytoplasm [GO:0005737]; cytosol [GO:0005829]; ferric iron binding [GO:0008199]; ferrous iron binding [GO:0008198]; iron-sulfur cluster assembly [GO:0016226]	ferric iron binding [GO:0008199]; ferrous iron binding [GO:0008198]
CYCA_ECOLI	P0AAE0	D-serine/D-alanine/glycine transporter	cycA	7	11	0.0160476	-0.879926	beta-alanine transport [GO:0001762]; D-alanine transport [GO:0042941]; D-serine transport [GO:0042942]; glycine transport [GO:0015816]; L-alanine transport [GO:0015808]	integral component of plasma membrane [GO:0005887]; plasma membrane [GO:0005886]	integral component of plasma membrane [GO:0005887]; plasma membrane [GO:0005886]; beta-alanine transmembrane transporter activity [GO:0001761]; D-alanine transmembrane transporter activity [GO:0042944]; D-serine transmembrane transporter activity [GO:0042945]; glycine transmembrane transporter activity [GO:0015187]; L-alanine transmembrane transporter activity [GO:0015180]; beta-alanine transport…	beta-alanine transmembrane transporter activity [GO:0001761]; D-alanine transmembrane transporter activity [GO:0042944]; D-serine transmembrane transporter activity [GO:0042945]; glycine transmembrane transporter activity [GO:0015187]; L-alanine transmembrane transporter activity [GO:0015180]	SUBCELLULAR LOCATION: Cell inner membrane {ECO:0000269|PubMed:15919996}; Multi-pass membrane protein.
CYDA_ECOLI	P0ABJ9	Cytochrome bd-I ubiquinol oxidase subunit 1 (EC 7.1.1.7) (Cytochrome bd-I oxidase subunit I) (Cytochrome d ubiquinol oxidase subunit I)	cydA	26	27	-0.0976481	-0.140619	aerobic electron transport chain [GO:0019646]	cytochrome complex [GO:0070069]; integral component of plasma membrane [GO:0005887]; membrane [GO:0016020]; plasma membrane [GO:0005886]	cytochrome complex [GO:0070069]; integral component of plasma membrane [GO:0005887]; membrane [GO:0016020]; plasma membrane [GO:0005886]; electron transfer activity [GO:0009055]; heme binding [GO:0020037]; metal ion binding [GO:0046872]; oxidoreductase activity, acting on diphenols and related substances as donors [GO:0016679]; oxidoreductase activity, acting on diphenols and related substances a…	electron transfer activity [GO:0009055]; heme binding [GO:0020037]; metal ion binding [GO:0046872]; oxidoreductase activity, acting on diphenols and related substances as donors [GO:0016679]; oxidoreductase activity, acting on diphenols and related substances as donors, oxygen as acceptor [GO:0016682]	SUBCELLULAR LOCATION: Cell inner membrane {ECO:0000269|PubMed:15013751, ECO:0000269|PubMed:16079137}; Multi-pass membrane protein {ECO:0000269|PubMed:15013751, ECO:0000269|PubMed:16079137}.
CYDB_ECOLI	P0ABK2	Cytochrome bd-I ubiquinol oxidase subunit 2 (EC 7.1.1.7) (Cytochrome bd-I oxidase subunit II) (Cytochrome d ubiquinol oxidase subunit II)	cydB	6	3	-0.062893	-0.1284	aerobic electron transport chain [GO:0019646]	cytochrome complex [GO:0070069]; integral component of plasma membrane [GO:0005887]; membrane [GO:0016020]; plasma membrane [GO:0005886]	cytochrome complex [GO:0070069]; integral component of plasma membrane [GO:0005887]; membrane [GO:0016020]; plasma membrane [GO:0005886]; electron transfer activity [GO:0009055]; heme binding [GO:0020037]; metal ion binding [GO:0046872]; oxidoreductase activity, acting on diphenols and related substances as donors, oxygen as acceptor [GO:0016682]; aerobic electron transport chain [GO:0019646]	electron transfer activity [GO:0009055]; heme binding [GO:0020037]; metal ion binding [GO:0046872]; oxidoreductase activity, acting on diphenols and related substances as donors, oxygen as acceptor [GO:0016682]	SUBCELLULAR LOCATION: Cell inner membrane {ECO:0000269|PubMed:15013751, ECO:0000269|PubMed:16079137}; Multi-pass membrane protein {ECO:0000269|PubMed:15013751, ECO:0000269|PubMed:16079137}. Note=The displayed topology is based on (PubMed:15013751) not the large scale studies (PubMed:15919996). {ECO:0000269|PubMed:15013751, ECO:0000269|PubMed:15919996}.
CYDC_ECOLI	P23886	ATP-binding/permease protein CydC	cydC	25	18	-0.0816736	-0.182841	cell redox homeostasis [GO:0045454]; cysteine export across plasma membrane [GO:0033228]; glutathione transmembrane transport [GO:0034775]; regulation of heme biosynthetic process [GO:0070453]	ATP-binding cassette (ABC) transporter complex [GO:0043190]; integral component of membrane [GO:0016021]; integral component of plasma membrane [GO:0005887]	ATP-binding cassette (ABC) transporter complex [GO:0043190]; integral component of membrane [GO:0016021]; integral component of plasma membrane [GO:0005887]; ATP binding [GO:0005524]; ATPase-coupled transmembrane transporter activity [GO:0042626]; cell redox homeostasis [GO:0045454]; cysteine export across plasma membrane [GO:0033228]; glutathione transmembrane transport [GO:0034775]; regulation …	ATPase-coupled transmembrane transporter activity [GO:0042626]; ATP binding [GO:0005524]	SUBCELLULAR LOCATION: Cell inner membrane {ECO:0000269|PubMed:15919996}; Multi-pass membrane protein {ECO:0000255|PROSITE-ProRule:PRU00441, ECO:0000269|PubMed:15919996}.
CYDD_ECOLI	P29018	ATP-binding/permease protein CydD	cydD	15	12	-0.130628	-0.176972	cell redox homeostasis [GO:0045454]; cysteine export across plasma membrane [GO:0033228]; glutathione transmembrane transport [GO:0034775]; transmembrane transport [GO:0055085]	ATP-binding cassette (ABC) transporter complex [GO:0043190]; integral component of plasma membrane [GO:0005887]; membrane [GO:0016020]; plasma membrane [GO:0005886]	ATP-binding cassette (ABC) transporter complex [GO:0043190]; integral component of plasma membrane [GO:0005887]; membrane [GO:0016020]; plasma membrane [GO:0005886]; ATP binding [GO:0005524]; ATPase-coupled transmembrane transporter activity [GO:0042626]; cell redox homeostasis [GO:0045454]; cysteine export across plasma membrane [GO:0033228]; glutathione transmembrane transport [GO:0034775]; tra…	ATPase-coupled transmembrane transporter activity [GO:0042626]; ATP binding [GO:0005524]	SUBCELLULAR LOCATION: Cell inner membrane {ECO:0000269|PubMed:15919996}; Multi-pass membrane protein {ECO:0000255|PROSITE-ProRule:PRU00441, ECO:0000269|PubMed:15919996}.
CYNR_ECOLI	P27111	HTH-type transcriptional regulator CynR (Cyn operon transcriptional activator)	cynR	1	4	-0.0462278	0.242817	regulation of transcription, DNA-templated [GO:0006355]	cytoplasm [GO:0005737]; protein-DNA complex [GO:0032993]	cytoplasm [GO:0005737]; protein-DNA complex [GO:0032993]; bacterial-type cis-regulatory region sequence-specific DNA binding [GO:0000986]; DNA-binding transcription factor activity [GO:0003700]; regulation of transcription, DNA-templated [GO:0006355]	bacterial-type cis-regulatory region sequence-specific DNA binding [GO:0000986]; DNA-binding transcription factor activity [GO:0003700]	SUBCELLULAR LOCATION: Cytoplasm.
CYOA_ECOLI	P0ABJ1	Cytochrome bo(3) ubiquinol oxidase subunit 2 (Cytochrome b562-o complex subunit II) (Cytochrome o ubiquinol oxidase subunit 2) (Cytochrome o subunit 2) (Oxidase bo(3) subunit 2) (Ubiquinol oxidase chain B) (Ubiquinol oxidase polypeptide II) (Ubiquinol oxidase subunit 2)	cyoA	75	55	-0.0848494	-0.155899	aerobic electron transport chain [GO:0019646]; aerobic respiration [GO:0009060]; ATP synthesis coupled electron transport [GO:0042773]; electron transport coupled proton transport [GO:0015990]	cytochrome o ubiquinol oxidase complex [GO:0009319]; integral component of external side of plasma membrane [GO:0071575]; integral component of plasma membrane [GO:0005887]; plasma membrane [GO:0005886]; respirasome [GO:0070469]	cytochrome o ubiquinol oxidase complex [GO:0009319]; integral component of external side of plasma membrane [GO:0071575]; integral component of plasma membrane [GO:0005887]; plasma membrane [GO:0005886]; respirasome [GO:0070469]; copper ion binding [GO:0005507]; cytochrome bo3 ubiquinol oxidase activity [GO:0009486]; cytochrome-c oxidase activity [GO:0004129]; electron transfer activity [GO:00090…	copper ion binding [GO:0005507]; cytochrome bo3 ubiquinol oxidase activity [GO:0009486]; cytochrome-c oxidase activity [GO:0004129]; electron transfer activity [GO:0009055]; oxidoreductase activity, acting on diphenols and related substances as donors, oxygen as acceptor [GO:0016682]; oxidoreduction-driven active transmembrane transporter activity [GO:0015453]; proton transmembrane transporter ac…	SUBCELLULAR LOCATION: Cell inner membrane {ECO:0000269|PubMed:16079137, ECO:0000269|PubMed:6365921}; Multi-pass membrane protein {ECO:0000269|PubMed:16079137, ECO:0000269|PubMed:6365921}.
CYOB_ECOLI	P0ABI8	Cytochrome bo(3) ubiquinol oxidase subunit 1 (EC 7.1.1.3) (Cytochrome b562-o complex subunit I) (Cytochrome o ubiquinol oxidase subunit 1) (Cytochrome o subunit 1) (Oxidase bo(3) subunit 1) (Ubiquinol oxidase chain A) (Ubiquinol oxidase polypeptide I) (Ubiquinol oxidase subunit 1)	cyoB	22	18	-0.0501303	-0.0150361	aerobic electron transport chain [GO:0019646]; aerobic respiration [GO:0009060]; electron transport coupled proton transport [GO:0015990]; respiratory electron transport chain [GO:0022904]	cytochrome o ubiquinol oxidase complex [GO:0009319]; integral component of plasma membrane [GO:0005887]; plasma membrane [GO:0005886]; respirasome [GO:0070469]	cytochrome o ubiquinol oxidase complex [GO:0009319]; integral component of plasma membrane [GO:0005887]; plasma membrane [GO:0005886]; respirasome [GO:0070469]; copper ion binding [GO:0005507]; cytochrome bo3 ubiquinol oxidase activity [GO:0009486]; cytochrome-c oxidase activity [GO:0004129]; electron transfer activity [GO:0009055]; heme binding [GO:0020037]; oxidoreductase activity, acting on di…	copper ion binding [GO:0005507]; cytochrome bo3 ubiquinol oxidase activity [GO:0009486]; cytochrome-c oxidase activity [GO:0004129]; electron transfer activity [GO:0009055]; heme binding [GO:0020037]; oxidoreductase activity, acting on diphenols and related substances as donors, oxygen as acceptor [GO:0016682]; oxidoreduction-driven active transmembrane transporter activity [GO:0015453]; proton t…	SUBCELLULAR LOCATION: Cell inner membrane {ECO:0000269|PubMed:6365921}; Multi-pass membrane protein {ECO:0000269|PubMed:6365921}.
CYOE_ECOLI	P0AEA5	Protoheme IX farnesyltransferase (EC 2.5.1.141) (Heme B farnesyltransferase) (Heme O synthase)	cyoE	1	1	-0.126407	-0.686535	cellular respiration [GO:0045333]; heme biosynthetic process [GO:0006783]; heme O biosynthetic process [GO:0048034]	integral component of membrane [GO:0016021]; plasma membrane [GO:0005886]	integral component of membrane [GO:0016021]; plasma membrane [GO:0005886]; farnesyltranstransferase activity [GO:0004311]; protoheme IX farnesyltransferase activity [GO:0008495]; cellular respiration [GO:0045333]; heme biosynthetic process [GO:0006783]; heme O biosynthetic process [GO:0048034]	farnesyltranstransferase activity [GO:0004311]; protoheme IX farnesyltransferase activity [GO:0008495]	SUBCELLULAR LOCATION: Cell inner membrane; Multi-pass membrane protein.
CYSA_ECOLI	P16676	Sulfate/thiosulfate import ATP-binding protein CysA (EC 7.3.2.3) (Sulfate-transporting ATPase)	cysA	10	43	-0.13831	-0.436414	sulfate transport [GO:0008272]	ATP-binding cassette (ABC) transporter complex [GO:0043190]	ATP-binding cassette (ABC) transporter complex [GO:0043190]; ABC-type sulfate transporter activity [GO:0015419]; ABC-type thiosulfate transporter activity [GO:0102025]; ATP binding [GO:0005524]; sulfate transport [GO:0008272]	ABC-type sulfate transporter activity [GO:0015419]; ABC-type thiosulfate transporter activity [GO:0102025]; ATP binding [GO:0005524]	SUBCELLULAR LOCATION: Cell inner membrane {ECO:0000255|HAMAP-Rule:MF_01701}; Peripheral membrane protein {ECO:0000255|HAMAP-Rule:MF_01701}.
CYSB_ECOLI	P0A9F3	HTH-type transcriptional regulator CysB (Cys regulon transcriptional activator)	cysB	24	26	-0.018543	-0.338785	cysteine biosynthetic process [GO:0019344]; regulation of transcription, DNA-templated [GO:0006355]; response to X-ray [GO:0010165]	cytosol [GO:0005829]	cytosol [GO:0005829]; DNA binding [GO:0003677]; DNA-binding transcription factor activity [GO:0003700]; identical protein binding [GO:0042802]; transcription cis-regulatory region binding [GO:0000976]; cysteine biosynthetic process [GO:0019344]; regulation of transcription, DNA-templated [GO:0006355]; response to X-ray [GO:0010165]	DNA binding [GO:0003677]; DNA-binding transcription factor activity [GO:0003700]; identical protein binding [GO:0042802]; transcription cis-regulatory region binding [GO:0000976]	SUBCELLULAR LOCATION: Cytoplasm.
CYSC_ECOLI	P0A6J1	Adenylyl-sulfate kinase (EC 2.7.1.25) (APS kinase) (ATP adenosine-5'-phosphosulfate 3'-phosphotransferase) (Adenosine-5'-phosphosulfate kinase)	cysC	3	6	-0.0800359	-0.313802	hydrogen sulfide biosynthetic process [GO:0070814]; phosphorylation [GO:0016310]; sulfate assimilation [GO:0000103]		adenylylsulfate kinase activity [GO:0004020]; ATP binding [GO:0005524]; identical protein binding [GO:0042802]; hydrogen sulfide biosynthetic process [GO:0070814]; phosphorylation [GO:0016310]; sulfate assimilation [GO:0000103]	adenylylsulfate kinase activity [GO:0004020]; ATP binding [GO:0005524]; identical protein binding [GO:0042802]
CYSD_ECOLI	P21156	Sulfate adenylyltransferase subunit 2 (EC 2.7.7.4) (ATP-sulfurylase small subunit) (Sulfate adenylate transferase) (SAT)	cysD	10	39	-0.299547	-0.0524995	hydrogen sulfide biosynthetic process [GO:0070814]; response to oxidative stress [GO:0006979]; sulfate assimilation [GO:0000103]; sulfate reduction [GO:0019419]; sulfur compound metabolic process [GO:0006790]		ATP binding [GO:0005524]; sulfate adenylyltransferase (ATP) activity [GO:0004781]; hydrogen sulfide biosynthetic process [GO:0070814]; response to oxidative stress [GO:0006979]; sulfate assimilation [GO:0000103]; sulfate reduction [GO:0019419]; sulfur compound metabolic process [GO:0006790]	ATP binding [GO:0005524]; sulfate adenylyltransferase (ATP) activity [GO:0004781]
CYSE_ECOLI	P0A9D4	Serine acetyltransferase (SAT) (EC 2.3.1.30)	cysE	14	12	-0.0318304	-0.675568	cysteine biosynthetic process from serine [GO:0006535]; response to X-ray [GO:0010165]	cysteine synthase complex [GO:0009333]; cytosol [GO:0005829]	cysteine synthase complex [GO:0009333]; cytosol [GO:0005829]; serine O-acetyltransferase activity [GO:0009001]; cysteine biosynthetic process from serine [GO:0006535]; response to X-ray [GO:0010165]	serine O-acetyltransferase activity [GO:0009001]	SUBCELLULAR LOCATION: Cytoplasm.
CYSG_ECOLI	P0AEA8	Siroheme synthase [Includes: Uroporphyrinogen-III C-methyltransferase (Urogen III methylase) (EC 2.1.1.107) (SUMT) (Uroporphyrinogen III methylase) (UROM); Precorrin-2 dehydrogenase (EC 1.3.1.76); Sirohydrochlorin ferrochelatase (EC 4.99.1.4)]	cysG	14	17	0.0108183	-0.236975	cobalamin biosynthetic process [GO:0009236]; methylation [GO:0032259]; response to osmotic stress [GO:0006970]; siroheme biosynthetic process [GO:0019354]		NAD binding [GO:0051287]; precorrin-2 dehydrogenase activity [GO:0043115]; sirohydrochlorin ferrochelatase activity [GO:0051266]; uroporphyrin-III C-methyltransferase activity [GO:0004851]; cobalamin biosynthetic process [GO:0009236]; methylation [GO:0032259]; response to osmotic stress [GO:0006970]; siroheme biosynthetic process [GO:0019354]	NAD binding [GO:0051287]; precorrin-2 dehydrogenase activity [GO:0043115]; sirohydrochlorin ferrochelatase activity [GO:0051266]; uroporphyrin-III C-methyltransferase activity [GO:0004851]
CYSH_ECOLI	P17854	Phosphoadenosine 5'-phosphosulfate reductase (PAPS reductase) (EC 1.8.4.8) (3'-phosphoadenylylsulfate reductase) (PAPS reductase, thioredoxin dependent) (PAPS sulfotransferase) (PAdoPS reductase)	cysH	29	51	-0.232477	0.865526	hydrogen sulfide biosynthetic process [GO:0070814]; sulfate assimilation, phosphoadenylyl sulfate reduction by phosphoadenylyl-sulfate reductase (thioredoxin) [GO:0019379]; sulfur compound metabolic process [GO:0006790]	cytoplasm [GO:0005737]	cytoplasm [GO:0005737]; phosphoadenylyl-sulfate reductase (thioredoxin) activity [GO:0004604]; hydrogen sulfide biosynthetic process [GO:0070814]; sulfate assimilation, phosphoadenylyl sulfate reduction by phosphoadenylyl-sulfate reductase (thioredoxin) [GO:0019379]; sulfur compound metabolic process [GO:0006790]	phosphoadenylyl-sulfate reductase (thioredoxin) activity [GO:0004604]	SUBCELLULAR LOCATION: Cytoplasm {ECO:0000255|HAMAP-Rule:MF_00063, ECO:0000305}.
CYSI_ECOLI	P17846	Sulfite reductase [NADPH] hemoprotein beta-component (SiR-HP) (SiRHP) (EC 1.8.1.2)	cysI	114	115	-0.305493	0.443027	cysteine biosynthetic process [GO:0019344]; hydrogen sulfide biosynthetic process [GO:0070814]; sulfate assimilation [GO:0000103]	sulfite reductase complex (NADPH) [GO:0009337]	sulfite reductase complex (NADPH) [GO:0009337]; 4 iron, 4 sulfur cluster binding [GO:0051539]; heme binding [GO:0020037]; metal ion binding [GO:0046872]; NADP binding [GO:0050661]; sulfite reductase (ferredoxin) activity [GO:0050311]; sulfite reductase (NADPH) activity [GO:0004783]; sulfite reductase activity [GO:0016002]; cysteine biosynthetic process [GO:0019344]; hydrogen sulfide biosynthetic …	4 iron, 4 sulfur cluster binding [GO:0051539]; heme binding [GO:0020037]; metal ion binding [GO:0046872]; NADP binding [GO:0050661]; sulfite reductase (ferredoxin) activity [GO:0050311]; sulfite reductase (NADPH) activity [GO:0004783]; sulfite reductase activity [GO:0016002]
CYSJ_ECOLI	P38038	Sulfite reductase [NADPH] flavoprotein alpha-component (SiR-FP) (EC 1.8.1.2)	cysJ	90	97	-0.236408	0.253775	cysteine biosynthetic process [GO:0019344]; hydrogen sulfide biosynthetic process [GO:0070814]; sulfate assimilation [GO:0000103]	cytosol [GO:0005829]; sulfite reductase complex (NADPH) [GO:0009337]	cytosol [GO:0005829]; sulfite reductase complex (NADPH) [GO:0009337]; flavin adenine dinucleotide binding [GO:0050660]; FMN binding [GO:0010181]; NADP+ binding [GO:0070401]; oxidoreductase activity [GO:0016491]; riboflavin reductase (NADPH) activity [GO:0042602]; sulfite reductase (NADPH) activity [GO:0004783]; cysteine biosynthetic process [GO:0019344]; hydrogen sulfide biosynthetic process [GO:…	flavin adenine dinucleotide binding [GO:0050660]; FMN binding [GO:0010181]; NADP+ binding [GO:0070401]; oxidoreductase activity [GO:0016491]; riboflavin reductase (NADPH) activity [GO:0042602]; sulfite reductase (NADPH) activity [GO:0004783]
CYSK_ECOLI	P0ABK5	Cysteine synthase A (CSase A) (EC 2.5.1.47) (O-acetylserine (thiol)-lyase A) (OAS-TL A) (O-acetylserine sulfhydrylase A) (S-carboxymethylcysteine synthase) (EC 4.5.1.5) (Sulfate starvation-induced protein 5) (SSI5)	cysK	171	149	-0.224244	-0.0902008	cellular amino acid biosynthetic process [GO:0008652]; cysteine biosynthetic process from serine [GO:0006535]	cysteine synthase complex [GO:0009333]; cytoplasm [GO:0005737]; cytosol [GO:0005829]	cysteine synthase complex [GO:0009333]; cytoplasm [GO:0005737]; cytosol [GO:0005829]; cysteine synthase activity [GO:0004124]; identical protein binding [GO:0042802]; L-cysteine desulfhydrase activity [GO:0080146]; pyridoxal phosphate binding [GO:0030170]; S-carboxymethylcysteine synthase activity [GO:0050272]; transferase activity [GO:0016740]; cellular amino acid biosynthetic process [GO:000865…	cysteine synthase activity [GO:0004124]; identical protein binding [GO:0042802]; L-cysteine desulfhydrase activity [GO:0080146]; pyridoxal phosphate binding [GO:0030170]; S-carboxymethylcysteine synthase activity [GO:0050272]; transferase activity [GO:0016740]
CYSM_ECOLI	P16703	Cysteine synthase B (CSase B) (EC 2.5.1.47) (O-acetylserine (thiol)-lyase B) (OAS-TL B) (O-acetylserine sulfhydrylase B)	cysM	38	38	-0.195693	-0.274457	cysteine biosynthetic process from serine [GO:0006535]	cytoplasm [GO:0005737]	cytoplasm [GO:0005737]; cysteine synthase activity [GO:0004124]; L-cysteine desulfhydrase activity [GO:0080146]; pyridoxal phosphate binding [GO:0030170]; cysteine biosynthetic process from serine [GO:0006535]	cysteine synthase activity [GO:0004124]; L-cysteine desulfhydrase activity [GO:0080146]; pyridoxal phosphate binding [GO:0030170]
CYSN_ECOLI	P23845	Sulfate adenylyltransferase subunit 1 (EC 2.7.7.4) (ATP-sulfurylase large subunit) (Sulfate adenylate transferase) (SAT)	cysN	32	86	-0.267632	-0.145806	hydrogen sulfide biosynthetic process [GO:0070814]; sulfate assimilation [GO:0000103]; sulfur compound metabolic process [GO:0006790]		ATP binding [GO:0005524]; GTP binding [GO:0005525]; GTPase activity [GO:0003924]; sulfate adenylyltransferase (ATP) activity [GO:0004781]; hydrogen sulfide biosynthetic process [GO:0070814]; sulfate assimilation [GO:0000103]; sulfur compound metabolic process [GO:0006790]	ATP binding [GO:0005524]; GTPase activity [GO:0003924]; GTP binding [GO:0005525]; sulfate adenylyltransferase (ATP) activity [GO:0004781]
CYSP_ECOLI	P16700	Thiosulfate-binding protein	cysP	106	95	-0.192935	0.0423229	sulfate transport [GO:0008272]; sulfur compound metabolic process [GO:0006790]; thiosulfate transport [GO:0015709]	outer membrane-bounded periplasmic space [GO:0030288]	outer membrane-bounded periplasmic space [GO:0030288]; ABC-type sulfate transporter activity [GO:0015419]; sulfate binding [GO:0043199]; thiosulfate binding [GO:0036173]; sulfate transport [GO:0008272]; sulfur compound metabolic process [GO:0006790]; thiosulfate transport [GO:0015709]	ABC-type sulfate transporter activity [GO:0015419]; sulfate binding [GO:0043199]; thiosulfate binding [GO:0036173]	SUBCELLULAR LOCATION: Periplasm.
CYSQ_ECOLI	P22255	3'(2'),5'-bisphosphate nucleotidase CysQ (EC 3.1.3.7) (3'(2'),5-bisphosphonucleoside 3'(2')-phosphohydrolase) (3'-phosphoadenosine 5'-phosphate phosphatase) (PAP phosphatase) (DPNPase)	cysQ	25	21	-0.026329	-0.569963	3'-phosphoadenosine 5'-phosphosulfate metabolic process [GO:0050427]; inositol phosphate dephosphorylation [GO:0046855]; phosphatidylinositol phosphate biosynthetic process [GO:0046854]; sulfate assimilation [GO:0000103]	plasma membrane [GO:0005886]	plasma membrane [GO:0005886]; 3'(2'),5'-bisphosphate nucleotidase activity [GO:0008441]; magnesium ion binding [GO:0000287]; 3'-phosphoadenosine 5'-phosphosulfate metabolic process [GO:0050427]; inositol phosphate dephosphorylation [GO:0046855]; phosphatidylinositol phosphate biosynthetic process [GO:0046854]; sulfate assimilation [GO:0000103]	3'(2'),5'-bisphosphate nucleotidase activity [GO:0008441]; magnesium ion binding [GO:0000287]	SUBCELLULAR LOCATION: Cell inner membrane {ECO:0000255|HAMAP-Rule:MF_02095, ECO:0000269|PubMed:15911532}; Peripheral membrane protein {ECO:0000255|HAMAP-Rule:MF_02095, ECO:0000305}; Cytoplasmic side {ECO:0000255|HAMAP-Rule:MF_02095, ECO:0000305}.
CYST_ECOLI	P16701	Sulfate transport system permease protein CysT	cysU	3	5	-0.263015	-0.0621884	sulfate transport [GO:0008272]	integral component of membrane [GO:0016021]; plasma membrane [GO:0005886]	integral component of membrane [GO:0016021]; plasma membrane [GO:0005886]; ABC-type sulfate transporter activity [GO:0015419]; sulfate transport [GO:0008272]	ABC-type sulfate transporter activity [GO:0015419]	SUBCELLULAR LOCATION: Cell inner membrane {ECO:0000269|PubMed:15919996}; Multi-pass membrane protein {ECO:0000255|PROSITE-ProRule:PRU00441, ECO:0000269|PubMed:15919996}.
CYSW_ECOLI	P0AEB0	Sulfate transport system permease protein CysW	cysW	1	2	-0.330296	-0.105761		integral component of membrane [GO:0016021]; plasma membrane [GO:0005886]	integral component of membrane [GO:0016021]; plasma membrane [GO:0005886]; ABC-type sulfate transporter activity [GO:0015419]	ABC-type sulfate transporter activity [GO:0015419]	SUBCELLULAR LOCATION: Cell inner membrane; Multi-pass membrane protein.
CYSZ_ECOLI	P0A6J3	Sulfate transporter CysZ	cysZ	3	11	0.0503922	0.252026	cysteine biosynthetic process [GO:0019344]; sulfate assimilation [GO:0000103]; sulfate transmembrane transport [GO:1902358]	integral component of plasma membrane [GO:0005887]; plasma membrane [GO:0005886]	integral component of plasma membrane [GO:0005887]; plasma membrane [GO:0005886]; high-affinity sulfate:proton symporter activity [GO:0009675]; sulfate transmembrane transporter activity [GO:0015116]; cysteine biosynthetic process [GO:0019344]; sulfate assimilation [GO:0000103]; sulfate transmembrane transport [GO:1902358]	high-affinity sulfate:proton symporter activity [GO:0009675]; sulfate transmembrane transporter activity [GO:0015116]	SUBCELLULAR LOCATION: Cell inner membrane {ECO:0000255|HAMAP-Rule:MF_00468, ECO:0000269|PubMed:15919996}; Multi-pass membrane protein {ECO:0000255|HAMAP-Rule:MF_00468}.
CYTR_ECOLI	P0ACN7	HTH-type transcriptional repressor CytR	cytR	5	4	-0.049799	-0.657493	negative regulation of transcription, DNA-templated [GO:0045892]; regulation of transcription, DNA-templated [GO:0006355]	cytosol [GO:0005829]	cytosol [GO:0005829]; DNA-binding transcription factor activity [GO:0003700]; transcription cis-regulatory region binding [GO:0000976]; negative regulation of transcription, DNA-templated [GO:0045892]; regulation of transcription, DNA-templated [GO:0006355]	DNA-binding transcription factor activity [GO:0003700]; transcription cis-regulatory region binding [GO:0000976]
DACA_ECOLI	P0AEB2	D-alanyl-D-alanine carboxypeptidase DacA (DD-carboxypeptidase) (DD-peptidase) (EC 3.4.16.4) (Beta-lactamase) (EC 3.5.2.6) (Penicillin-binding protein 5) (PBP-5)	dacA	149	112	0.00314046	0.563191	cell wall organization [GO:0071555]; peptidoglycan biosynthetic process [GO:0009252]; peptidoglycan metabolic process [GO:0000270]; regulation of cell shape [GO:0008360]	integral component of periplasmic side of plasma membrane [GO:1990914]; integral component of plasma membrane [GO:0005887]; outer membrane-bounded periplasmic space [GO:0030288]; plasma membrane [GO:0005886]	integral component of periplasmic side of plasma membrane [GO:1990914]; integral component of plasma membrane [GO:0005887]; outer membrane-bounded periplasmic space [GO:0030288]; plasma membrane [GO:0005886]; beta-lactamase activity [GO:0008800]; carboxypeptidase activity [GO:0004180]; penicillin binding [GO:0008658]; serine-type D-Ala-D-Ala carboxypeptidase activity [GO:0009002]; cell wall organ…	beta-lactamase activity [GO:0008800]; carboxypeptidase activity [GO:0004180]; penicillin binding [GO:0008658]; serine-type D-Ala-D-Ala carboxypeptidase activity [GO:0009002]	SUBCELLULAR LOCATION: Cell inner membrane; Peripheral membrane protein; Cytoplasmic side. Note=N-terminal lies in the periplasmic space.
DACB_ECOLI	P24228	D-alanyl-D-alanine carboxypeptidase DacB (DD-carboxypeptidase) (DD-peptidase) (EC 3.4.16.4) (D-alanyl-D-alanine endopeptidase) (DD-endopeptidase) (EC 3.4.21.-) (Penicillin-binding protein 4) (PBP-4)	dacB	10	11	-0.0150707	-0.192071	cell wall macromolecule catabolic process [GO:0016998]; cell wall organization [GO:0071555]; FtsZ-dependent cytokinesis [GO:0043093]; peptidoglycan biosynthetic process [GO:0009252]; peptidoglycan catabolic process [GO:0009253]; peptidoglycan metabolic process [GO:0000270]; peptidoglycan turnover [GO:0009254]; proteolysis [GO:0006508]; regulation of cell shape [GO:0008360]; response to antibiotic…	periplasmic space [GO:0042597]	periplasmic space [GO:0042597]; carboxypeptidase activity [GO:0004180]; endopeptidase activity [GO:0004175]; penicillin binding [GO:0008658]; serine-type carboxypeptidase activity [GO:0004185]; serine-type D-Ala-D-Ala carboxypeptidase activity [GO:0009002]; cell wall macromolecule catabolic process [GO:0016998]; cell wall organization [GO:0071555]; FtsZ-dependent cytokinesis [GO:0043093]; peptido…	carboxypeptidase activity [GO:0004180]; endopeptidase activity [GO:0004175]; penicillin binding [GO:0008658]; serine-type carboxypeptidase activity [GO:0004185]; serine-type D-Ala-D-Ala carboxypeptidase activity [GO:0009002]	SUBCELLULAR LOCATION: Periplasm {ECO:0000305}.
DACC_ECOLI	P08506	D-alanyl-D-alanine carboxypeptidase DacC (DD-carboxypeptidase) (DD-peptidase) (EC 3.4.16.4) (Penicillin-binding protein 6) (PBP-6)	dacC	67	50	-0.115207	-0.682707	cell wall organization [GO:0071555]; peptidoglycan biosynthetic process [GO:0009252]; regulation of cell shape [GO:0008360]; response to drug [GO:0042493]	integral component of plasma membrane [GO:0005887]; outer membrane-bounded periplasmic space [GO:0030288]; plasma membrane [GO:0005886]	integral component of plasma membrane [GO:0005887]; outer membrane-bounded periplasmic space [GO:0030288]; plasma membrane [GO:0005886]; carboxypeptidase activity [GO:0004180]; penicillin binding [GO:0008658]; serine-type D-Ala-D-Ala carboxypeptidase activity [GO:0009002]; cell wall organization [GO:0071555]; peptidoglycan biosynthetic process [GO:0009252]; regulation of cell shape [GO:0008360]; …	carboxypeptidase activity [GO:0004180]; penicillin binding [GO:0008658]; serine-type D-Ala-D-Ala carboxypeptidase activity [GO:0009002]	SUBCELLULAR LOCATION: Cell inner membrane {ECO:0000269|PubMed:3330754}; Peripheral membrane protein {ECO:0000269|PubMed:3330754}; Periplasmic side {ECO:0000269|PubMed:3330754}. Note=N-terminus lies in the periplasmic space, targeted there by the C-terminal amphiphilic helix (PMID:3330754).
DADA_ECOLI	P0A6J5	D-amino acid dehydrogenase (EC 1.4.99.-) (D-alanine dehydrogenase)	dadA	87	77	0.0225214	-0.895147	D-alanine catabolic process [GO:0055130]; L-alanine oxidation to pyruvate via D-alanine [GO:0019480]	cytoplasm [GO:0005737]; plasma membrane [GO:0005886]	cytoplasm [GO:0005737]; plasma membrane [GO:0005886]; D-amino-acid dehydrogenase activity [GO:0008718]; oxidoreductase activity [GO:0016491]; D-alanine catabolic process [GO:0055130]; L-alanine oxidation to pyruvate via D-alanine [GO:0019480]	D-amino-acid dehydrogenase activity [GO:0008718]; oxidoreductase activity [GO:0016491]	SUBCELLULAR LOCATION: Cell inner membrane {ECO:0000269|PubMed:13292, ECO:0000269|PubMed:15358424}; Peripheral membrane protein {ECO:0000269|PubMed:13292, ECO:0000269|PubMed:15358424}.
DAMX_ECOLI	P11557	Cell division protein DamX	damX	49	47	-0.00984763	-0.341058	cytokinetic process [GO:0032506]	cell division site [GO:0032153]; cell septum [GO:0030428]; integral component of plasma membrane [GO:0005887]	cell division site [GO:0032153]; cell septum [GO:0030428]; integral component of plasma membrane [GO:0005887]; peptidoglycan binding [GO:0042834]; cytokinetic process [GO:0032506]	peptidoglycan binding [GO:0042834]	SUBCELLULAR LOCATION: Cell inner membrane {ECO:0000305}; Single-pass membrane protein {ECO:0000255|HAMAP-Rule:MF_02021}. Note=Localizes at the septal ring (PubMed:19684127, PubMed:19880599, PubMed:23290046). Recruitment to the septal ring requires FtsZ (PubMed:19880599). {ECO:0000269|PubMed:19684127, ECO:0000269|PubMed:19880599, ECO:0000269|PubMed:23290046}.
DAPA_ECOLI	P0A6L2	4-hydroxy-tetrahydrodipicolinate synthase (HTPA synthase) (EC 4.3.3.7)	dapA	59	45	-0.0966596	0.184997	diaminopimelate biosynthetic process [GO:0019877]; lysine biosynthetic process via diaminopimelate [GO:0009089]	cytosol [GO:0005829]	cytosol [GO:0005829]; 4-hydroxy-tetrahydrodipicolinate synthase activity [GO:0008840]; identical protein binding [GO:0042802]; diaminopimelate biosynthetic process [GO:0019877]; lysine biosynthetic process via diaminopimelate [GO:0009089]	4-hydroxy-tetrahydrodipicolinate synthase activity [GO:0008840]; identical protein binding [GO:0042802]	SUBCELLULAR LOCATION: Cytoplasm.
DAPB_ECOLI	P04036	4-hydroxy-tetrahydrodipicolinate reductase (HTPA reductase) (EC 1.17.1.8)	dapB	44	28	-0.0774415	-0.242857	cellular amino acid biosynthetic process [GO:0008652]; diaminopimelate biosynthetic process [GO:0019877]; lysine biosynthetic process via diaminopimelate [GO:0009089]	cytosol [GO:0005829]	cytosol [GO:0005829]; 4-hydroxy-tetrahydrodipicolinate reductase [GO:0008839]; identical protein binding [GO:0042802]; NAD binding [GO:0051287]; NADP binding [GO:0050661]; oxidoreductase activity, acting on CH or CH2 groups, NAD or NADP as acceptor [GO:0016726]; cellular amino acid biosynthetic process [GO:0008652]; diaminopimelate biosynthetic process [GO:0019877]; lysine biosynthetic process vi…	4-hydroxy-tetrahydrodipicolinate reductase [GO:0008839]; identical protein binding [GO:0042802]; NAD binding [GO:0051287]; NADP binding [GO:0050661]; oxidoreductase activity, acting on CH or CH2 groups, NAD or NADP as acceptor [GO:0016726]	SUBCELLULAR LOCATION: Cytoplasm.
DAPD_ECOLI	P0A9D8	2,3,4,5-tetrahydropyridine-2,6-dicarboxylate N-succinyltransferase (EC 2.3.1.117) (Succinyl-CoA: tetrahydrodipicolinate N-succinyltransferase) (Tetrahydrodipicolinate N-succinyltransferase) (THDP succinyltransferase) (THP succinyltransferase) (Tetrahydropicolinate succinylase)	dapD	83	70	-0.0338371	0.0560138	diaminopimelate biosynthetic process [GO:0019877]; lysine biosynthetic process [GO:0009085]; lysine biosynthetic process via diaminopimelate [GO:0009089]	cytosol [GO:0005829]	cytosol [GO:0005829]; 2,3,4,5-tetrahydropyridine-2,6-dicarboxylate N-succinyltransferase activity [GO:0008666]; nucleotidyltransferase activity [GO:0016779]; diaminopimelate biosynthetic process [GO:0019877]; lysine biosynthetic process [GO:0009085]; lysine biosynthetic process via diaminopimelate [GO:0009089]	2,3,4,5-tetrahydropyridine-2,6-dicarboxylate N-succinyltransferase activity [GO:0008666]; nucleotidyltransferase activity [GO:0016779]	SUBCELLULAR LOCATION: Cytoplasm.
DAPE_ECOLI	P0AED7	Succinyl-diaminopimelate desuccinylase (SDAP desuccinylase) (EC 3.5.1.18) (N-succinyl-LL-2,6-diaminoheptanedioate amidohydrolase)	dapE	20	30	0.0358076	0.124607	diaminopimelate biosynthetic process [GO:0019877]; FtsZ-dependent cytokinesis [GO:0043093]; lysine biosynthetic process via diaminopimelate [GO:0009089]	cell division site [GO:0032153]; cytosol [GO:0005829]	cell division site [GO:0032153]; cytosol [GO:0005829]; cobalt ion binding [GO:0050897]; identical protein binding [GO:0042802]; succinyl-diaminopimelate desuccinylase activity [GO:0009014]; zinc ion binding [GO:0008270]; diaminopimelate biosynthetic process [GO:0019877]; FtsZ-dependent cytokinesis [GO:0043093]; lysine biosynthetic process via diaminopimelate [GO:0009089]	cobalt ion binding [GO:0050897]; identical protein binding [GO:0042802]; succinyl-diaminopimelate desuccinylase activity [GO:0009014]; zinc ion binding [GO:0008270]
DAPF_ECOLI	P0A6K1	Diaminopimelate epimerase (DAP epimerase) (EC 5.1.1.7) (PLP-independent amino acid racemase)	dapF	15	13	-0.0163742	-0.29471	lysine biosynthetic process via diaminopimelate [GO:0009089]	cytosol [GO:0005829]	cytosol [GO:0005829]; diaminopimelate epimerase activity [GO:0008837]; lysine biosynthetic process via diaminopimelate [GO:0009089]	diaminopimelate epimerase activity [GO:0008837]	SUBCELLULAR LOCATION: Cytoplasm {ECO:0000305}.
DAUA_ECOLI	P0AFR2	C4-dicarboxylic acid transporter DauA (Dicarboxylic acid uptake system A)	dauA	6	7	0.0950036	0.326886	aspartate transmembrane transport [GO:0015810]; fumarate transport [GO:0015741]; succinate transmembrane transport [GO:0071422]	integral component of membrane [GO:0016021]; plasma membrane [GO:0005886]	integral component of membrane [GO:0016021]; plasma membrane [GO:0005886]; fumarate transmembrane transporter activity [GO:0015138]; L-aspartate transmembrane transporter activity [GO:0015183]; secondary active sulfate transmembrane transporter activity [GO:0008271]; succinate transmembrane transporter activity [GO:0015141]; aspartate transmembrane transport [GO:0015810]; fumarate transport [GO:0…	fumarate transmembrane transporter activity [GO:0015138]; L-aspartate transmembrane transporter activity [GO:0015183]; secondary active sulfate transmembrane transporter activity [GO:0008271]; succinate transmembrane transporter activity [GO:0015141]	SUBCELLULAR LOCATION: Cell inner membrane {ECO:0000269|PubMed:15919996, ECO:0000269|PubMed:23278959}; Multi-pass membrane protein {ECO:0000269|PubMed:15919996, ECO:0000269|PubMed:23278959}.
DBHA_ECOLI	P0ACF0	DNA-binding protein HU-alpha (HU-2) (NS2)	hupA	46	32	0.0230645	-0.378679	cellular response to DNA damage stimulus [GO:0006974]; chromosome condensation [GO:0030261]; transcription, DNA-templated [GO:0006351]	cytosol [GO:0005829]; HU-DNA complex [GO:1990178]; membrane [GO:0016020]	cytosol [GO:0005829]; HU-DNA complex [GO:1990178]; membrane [GO:0016020]; DNA binding [GO:0003677]; identical protein binding [GO:0042802]; cellular response to DNA damage stimulus [GO:0006974]; chromosome condensation [GO:0030261]; transcription, DNA-templated [GO:0006351]	DNA binding [GO:0003677]; identical protein binding [GO:0042802]	SUBCELLULAR LOCATION: Cytoplasm, nucleoid {ECO:0000269|PubMed:21903814}. Note=Scattered throughout the nucleoid (PubMed:21903814). {ECO:0000269|PubMed:21903814}.
DBHB_ECOLI	P0ACF4	DNA-binding protein HU-beta (HU-1) (NS1)	hupB	41	32	0.0136699	-0.628031	chromosome condensation [GO:0030261]; transcription, DNA-templated [GO:0006351]	cytosol [GO:0005829]	cytosol [GO:0005829]; DNA binding [GO:0003677]; identical protein binding [GO:0042802]; chromosome condensation [GO:0030261]; transcription, DNA-templated [GO:0006351]	DNA binding [GO:0003677]; identical protein binding [GO:0042802]
DBPA_ECOLI	P21693	ATP-dependent RNA helicase DbpA (EC 3.6.4.13)	dbpA	8	9	0.0243746	0.28109	ribosomal large subunit assembly [GO:0000027]	cytoplasm [GO:0005737]	cytoplasm [GO:0005737]; 3'-5' RNA helicase activity [GO:0034458]; ADP binding [GO:0043531]; ATP binding [GO:0005524]; ATP hydrolysis activity [GO:0140603]; DNA/RNA helicase activity [GO:0033677]; RNA helicase activity [GO:0003724]; rRNA binding [GO:0019843]; ribosomal large subunit assembly [GO:0000027]	3'-5' RNA helicase activity [GO:0034458]; ADP binding [GO:0043531]; ATP binding [GO:0005524]; ATP hydrolysis activity [GO:0140603]; DNA/RNA helicase activity [GO:0033677]; RNA helicase activity [GO:0003724]; rRNA binding [GO:0019843]	SUBCELLULAR LOCATION: Cytoplasm {ECO:0000305}.
DCDA_ECOLI	P00861	Diaminopimelate decarboxylase (DAP decarboxylase) (DAPDC) (EC 4.1.1.20)	lysA	2	6	-0.0626706	0.117346	lysine biosynthetic process via diaminopimelate [GO:0009089]		diaminopimelate decarboxylase activity [GO:0008836]; pyridoxal phosphate binding [GO:0030170]; lysine biosynthetic process via diaminopimelate [GO:0009089]	diaminopimelate decarboxylase activity [GO:0008836]; pyridoxal phosphate binding [GO:0030170]
DCD_ECOLI	P28248	dCTP deaminase (EC 3.5.4.13) (Deoxycytidine triphosphate deaminase)	dcd	5	8	0.0117412	-0.0171779	dTTP biosynthetic process [GO:0006235]; dUMP biosynthetic process [GO:0006226]; dUTP biosynthetic process [GO:0006229]; nucleobase-containing small molecule interconversion [GO:0015949]; protein homotrimerization [GO:0070207]; response to radiation [GO:0009314]	cytosol [GO:0005829]	cytosol [GO:0005829]; dCTP deaminase activity [GO:0008829]; nucleotide binding [GO:0000166]; dTTP biosynthetic process [GO:0006235]; dUMP biosynthetic process [GO:0006226]; dUTP biosynthetic process [GO:0006229]; nucleobase-containing small molecule interconversion [GO:0015949]; protein homotrimerization [GO:0070207]; response to radiation [GO:0009314]	dCTP deaminase activity [GO:0008829]; nucleotide binding [GO:0000166]
DCEA_ECOLI	P69908	Glutamate decarboxylase alpha (GAD-alpha) (EC 4.1.1.15)	gadA	4	1	-0.29199	-0.28128	glutamate catabolic process [GO:0006538]; intracellular pH elevation [GO:0051454]	cytosol [GO:0005829]; membrane [GO:0016020]	cytosol [GO:0005829]; membrane [GO:0016020]; glutamate decarboxylase activity [GO:0004351]; pyridoxal phosphate binding [GO:0030170]; glutamate catabolic process [GO:0006538]; intracellular pH elevation [GO:0051454]	glutamate decarboxylase activity [GO:0004351]; pyridoxal phosphate binding [GO:0030170]
DCEB_ECOLI	P69910	Glutamate decarboxylase beta (GAD-beta) (EC 4.1.1.15)	gadB	56	56	-0.16246	-0.0271034	glutamate catabolic process [GO:0006538]; intracellular pH elevation [GO:0051454]	cytosol [GO:0005829]; membrane [GO:0016020]	cytosol [GO:0005829]; membrane [GO:0016020]; glutamate decarboxylase activity [GO:0004351]; pyridoxal phosphate binding [GO:0030170]; glutamate catabolic process [GO:0006538]; intracellular pH elevation [GO:0051454]	glutamate decarboxylase activity [GO:0004351]; pyridoxal phosphate binding [GO:0030170]	SUBCELLULAR LOCATION: Cytoplasm {ECO:0000269|PubMed:12912902}. Membrane {ECO:0000269|PubMed:12912902}. Note=Localized exclusively in the cytoplasm at neutral pH, but is recruited to the membrane when the pH falls.
DCM_ECOLI	P0AED9	DNA-cytosine methyltransferase (EC 2.1.1.37) (M.EcoDcm)	dcm	13	10	-0.0038882	-0.118107	C-5 methylation of cytosine [GO:0090116]; DNA restriction-modification system [GO:0009307]		DNA (cytosine-5-)-methyltransferase activity [GO:0003886]; C-5 methylation of cytosine [GO:0090116]; DNA restriction-modification system [GO:0009307]	DNA (cytosine-5-)-methyltransferase activity [GO:0003886]
DCOR_ECOLI	P21169	Constitutive ornithine decarboxylase (EC 4.1.1.17)	speC	14	18	0.0919871	-0.539889	putrescine biosynthetic process from ornithine [GO:0033387]; spermidine biosynthetic process [GO:0008295]	cytosol [GO:0005829]	cytosol [GO:0005829]; carboxy-lyase activity [GO:0016831]; ornithine decarboxylase activity [GO:0004586]; pyridoxal phosphate binding [GO:0030170]; putrescine biosynthetic process from ornithine [GO:0033387]; spermidine biosynthetic process [GO:0008295]	carboxy-lyase activity [GO:0016831]; ornithine decarboxylase activity [GO:0004586]; pyridoxal phosphate binding [GO:0030170]
DCP_ECOLI	P24171	Dipeptidyl carboxypeptidase (EC 3.4.15.5) (Peptidyl-dipeptidase Dcp)	dcp	93	78	-0.0822625	0.207246	proteolysis [GO:0006508]	cytoplasm [GO:0005737]; cytosol [GO:0005829]; outer membrane-bounded periplasmic space [GO:0030288]	cytoplasm [GO:0005737]; cytosol [GO:0005829]; outer membrane-bounded periplasmic space [GO:0030288]; carboxypeptidase activity [GO:0004180]; metal ion binding [GO:0046872]; metalloendopeptidase activity [GO:0004222]; metallopeptidase activity [GO:0008237]; proteolysis [GO:0006508]	carboxypeptidase activity [GO:0004180]; metal ion binding [GO:0046872]; metalloendopeptidase activity [GO:0004222]; metallopeptidase activity [GO:0008237]	SUBCELLULAR LOCATION: Cytoplasm {ECO:0000305|PubMed:8226676}.
DCRB_ECOLI	P0AEE1	Inner membrane lipoprotein DcrB	dcrB	63	67	-0.00624995	0.843968		periplasmic space [GO:0042597]	periplasmic space [GO:0042597]		SUBCELLULAR LOCATION: Cell membrane {ECO:0000255|HAMAP-Rule:MF_02248}; Lipid-anchor {ECO:0000255|HAMAP-Rule:MF_02248}; Periplasmic side {ECO:0000255|HAMAP-Rule:MF_02248}.
DCTA_ECOLI	P0A830	Aerobic C4-dicarboxylate transport protein	dctA	16	9	-0.0271679	-0.98831	cellular response to DNA damage stimulus [GO:0006974]; fumarate transport [GO:0015741]; L-aspartate transmembrane transport [GO:0070778]	integral component of membrane [GO:0016021]; integral component of plasma membrane [GO:0005887]; membrane [GO:0016020]; plasma membrane [GO:0005886]	integral component of membrane [GO:0016021]; integral component of plasma membrane [GO:0005887]; membrane [GO:0016020]; plasma membrane [GO:0005886]; fumarate transmembrane transporter activity [GO:0015138]; L-aspartate transmembrane transporter activity [GO:0015183]; malate:proton symporter activity [GO:0015366]; succinate transmembrane transporter activity [GO:0015141]; transmembrane transporte…	fumarate transmembrane transporter activity [GO:0015138]; L-aspartate transmembrane transporter activity [GO:0015183]; malate:proton symporter activity [GO:0015366]; succinate transmembrane transporter activity [GO:0015141]; transmembrane transporter activity [GO:0022857]	SUBCELLULAR LOCATION: Cell inner membrane {ECO:0000269|PubMed:15919996}; Multi-pass membrane protein {ECO:0000269|PubMed:15919996}.
DCUA_ECOLI	P0ABN5	Anaerobic C4-dicarboxylate transporter DcuA	dcuA	3	6	-0.0973729	-0.692741	C4-dicarboxylate transport [GO:0015740]; cellular nitrogen compound biosynthetic process [GO:0044271]; L-aspartate import across plasma membrane [GO:0140009]	integral component of plasma membrane [GO:0005887]; plasma membrane [GO:0005886]	integral component of plasma membrane [GO:0005887]; plasma membrane [GO:0005886]; C4-dicarboxylate transmembrane transporter activity [GO:0015556]; succinate:fumarate antiporter activity [GO:0005469]; C4-dicarboxylate transport [GO:0015740]; cellular nitrogen compound biosynthetic process [GO:0044271]; L-aspartate import across plasma membrane [GO:0140009]	C4-dicarboxylate transmembrane transporter activity [GO:0015556]; succinate:fumarate antiporter activity [GO:0005469]	SUBCELLULAR LOCATION: Cell inner membrane; Multi-pass membrane protein.
DCUP_ECOLI	P29680	Uroporphyrinogen decarboxylase (UPD) (URO-D) (EC 4.1.1.37)	hemE	32	43	-0.0386227	0.0858085	heme biosynthetic process [GO:0006783]; porphyrin-containing compound biosynthetic process [GO:0006779]; protoporphyrinogen IX biosynthetic process from glutamate [GO:0019353]; uroporphyrinogen III biosynthetic process [GO:0006780]	cytosol [GO:0005829]	cytosol [GO:0005829]; uroporphyrinogen decarboxylase activity [GO:0004853]; heme biosynthetic process [GO:0006783]; porphyrin-containing compound biosynthetic process [GO:0006779]; protoporphyrinogen IX biosynthetic process from glutamate [GO:0019353]; uroporphyrinogen III biosynthetic process [GO:0006780]	uroporphyrinogen decarboxylase activity [GO:0004853]	SUBCELLULAR LOCATION: Cytoplasm {ECO:0000255|HAMAP-Rule:MF_00218}.
DCUR_ECOLI	P0AD01	Transcriptional regulatory protein DcuR	dcuR	4	1	-0.0663121	-0.254289	phosphorelay signal transduction system [GO:0000160]; positive regulation of transcription, DNA-templated [GO:0045893]; transcription, DNA-templated [GO:0006351]	cytoplasm [GO:0005737]	cytoplasm [GO:0005737]; DNA binding [GO:0003677]; DNA-binding transcription activator activity [GO:0001216]; phosphorelay response regulator activity [GO:0000156]; phosphorelay signal transduction system [GO:0000160]; positive regulation of transcription, DNA-templated [GO:0045893]; transcription, DNA-templated [GO:0006351]	DNA binding [GO:0003677]; DNA-binding transcription activator activity [GO:0001216]; phosphorelay response regulator activity [GO:0000156]	SUBCELLULAR LOCATION: Cytoplasm {ECO:0000305}.
DCUS_ECOLI	P0AEC8	Sensor histidine kinase DcuS (EC 2.7.13.3) (Fumarate sensor)	dcuS	1	3	-0.108867	-0.167515	phosphorelay signal transduction system [GO:0000160]; protein autophosphorylation [GO:0046777]; protein phosphorylation [GO:0006468]; regulation of transcription, DNA-templated [GO:0006355]	cytosol [GO:0005829]; integral component of membrane [GO:0016021]; integral component of plasma membrane [GO:0005887]; outer membrane-bounded periplasmic space [GO:0030288]; plasma membrane [GO:0005886]; protein histidine kinase complex [GO:0009365]	cytosol [GO:0005829]; integral component of membrane [GO:0016021]; integral component of plasma membrane [GO:0005887]; outer membrane-bounded periplasmic space [GO:0030288]; plasma membrane [GO:0005886]; protein histidine kinase complex [GO:0009365]; ATP binding [GO:0005524]; identical protein binding [GO:0042802]; phosphorelay sensor kinase activity [GO:0000155]; protein histidine kinase activit…	ATP binding [GO:0005524]; identical protein binding [GO:0042802]; phosphorelay sensor kinase activity [GO:0000155]; protein histidine kinase activity [GO:0004673]	SUBCELLULAR LOCATION: Cell inner membrane; Multi-pass membrane protein.
DCYD_ECOLI	P76316	D-cysteine desulfhydrase (EC 4.4.1.15)	dcyD	38	47	-0.0865198	-0.0378124	cellular response to sulfur starvation [GO:0010438]; D-amino acid metabolic process [GO:0046416]; D-cysteine catabolic process [GO:0019447]; sulfur compound metabolic process [GO:0006790]; sulfur utilization [GO:0006791]	cytosol [GO:0005829]	cytosol [GO:0005829]; 3-chloro-D-alanine dehydrochlorinase activity [GO:0019149]; D-cysteine desulfhydrase activity [GO:0019148]; pyridoxal phosphate binding [GO:0030170]; cellular response to sulfur starvation [GO:0010438]; D-amino acid metabolic process [GO:0046416]; D-cysteine catabolic process [GO:0019447]; sulfur compound metabolic process [GO:0006790]; sulfur utilization [GO:0006791]	3-chloro-D-alanine dehydrochlorinase activity [GO:0019149]; D-cysteine desulfhydrase activity [GO:0019148]; pyridoxal phosphate binding [GO:0030170]
DDLA_ECOLI	P0A6J8	D-alanine--D-alanine ligase A (EC 6.3.2.4) (D-Ala-D-Ala ligase A) (D-alanylalanine synthetase A)	ddlA	72	71	0.0152673	0.211197	cell wall organization [GO:0071555]; peptidoglycan biosynthetic process [GO:0009252]; regulation of cell shape [GO:0008360]; response to X-ray [GO:0010165]	cytosol [GO:0005829]	cytosol [GO:0005829]; ATP binding [GO:0005524]; D-alanine-D-alanine ligase activity [GO:0008716]; metal ion binding [GO:0046872]; cell wall organization [GO:0071555]; peptidoglycan biosynthetic process [GO:0009252]; regulation of cell shape [GO:0008360]; response to X-ray [GO:0010165]	ATP binding [GO:0005524]; D-alanine-D-alanine ligase activity [GO:0008716]; metal ion binding [GO:0046872]	SUBCELLULAR LOCATION: Cytoplasm.
DDLB_ECOLI	P07862	D-alanine--D-alanine ligase B (EC 6.3.2.4) (D-Ala-D-Ala ligase B) (D-alanylalanine synthetase B)	ddlB	32	30	0.0556826	0.0832611	cell wall organization [GO:0071555]; peptidoglycan biosynthetic process [GO:0009252]; regulation of cell shape [GO:0008360]	cytosol [GO:0005829]	cytosol [GO:0005829]; ATP binding [GO:0005524]; D-alanine-D-alanine ligase activity [GO:0008716]; metal ion binding [GO:0046872]; cell wall organization [GO:0071555]; peptidoglycan biosynthetic process [GO:0009252]; regulation of cell shape [GO:0008360]	ATP binding [GO:0005524]; D-alanine-D-alanine ligase activity [GO:0008716]; metal ion binding [GO:0046872]	SUBCELLULAR LOCATION: Cytoplasm.
DDPA_ECOLI	P76128	Probable D,D-dipeptide-binding periplasmic protein DdpA	ddpA	22	18	-0.0978177	-0.601229	peptide transport [GO:0015833]; protein transport [GO:0015031]	ATP-binding cassette (ABC) transporter complex [GO:0043190]; outer membrane-bounded periplasmic space [GO:0030288]	ATP-binding cassette (ABC) transporter complex [GO:0043190]; outer membrane-bounded periplasmic space [GO:0030288]; peptide transmembrane transporter activity [GO:1904680]; peptide transport [GO:0015833]; protein transport [GO:0015031]	peptide transmembrane transporter activity [GO:1904680]	SUBCELLULAR LOCATION: Periplasm {ECO:0000305}.
DEAD_ECOLI	P0A9P6	ATP-dependent RNA helicase DeaD (EC 3.6.4.13) (Cold-shock DEAD box protein A) (Translation factor W2)	deaD	155	153	0.143574	0.859062	cellular response to cold [GO:0070417]; mRNA stabilization [GO:0048255]; positive regulation of translation [GO:0045727]; response to radiation [GO:0009314]; ribosomal large subunit assembly [GO:0000027]; RNA catabolic process [GO:0006401]	cytosol [GO:0005829]	cytosol [GO:0005829]; ATP binding [GO:0005524]; ATP hydrolysis activity [GO:0140603]; RNA binding [GO:0003723]; RNA helicase activity [GO:0003724]; RNA strand annealing activity [GO:0033592]; cellular response to cold [GO:0070417]; mRNA stabilization [GO:0048255]; positive regulation of translation [GO:0045727]; response to radiation [GO:0009314]; ribosomal large subunit assembly [GO:0000027]; RN…	ATP binding [GO:0005524]; ATP hydrolysis activity [GO:0140603]; RNA binding [GO:0003723]; RNA helicase activity [GO:0003724]; RNA strand annealing activity [GO:0033592]	SUBCELLULAR LOCATION: Cytoplasm {ECO:0000255|HAMAP-Rule:MF_00964, ECO:0000269|PubMed:8552679}.
DECR_ECOLI	P0ACJ5	DNA-binding transcriptional activator DecR	decR	2	2	0.078864	-0.717001	cysteine catabolic process [GO:0009093]; positive regulation of DNA-templated transcription, initiation [GO:2000144]; response to amino acid [GO:0043200]	cytosol [GO:0005829]	cytosol [GO:0005829]; sequence-specific DNA binding [GO:0043565]; cysteine catabolic process [GO:0009093]; positive regulation of DNA-templated transcription, initiation [GO:2000144]; response to amino acid [GO:0043200]	sequence-specific DNA binding [GO:0043565]
DEDA_ECOLI	P0ABP6	Protein DedA (Protein DSG-1)	dedA	4	6	-0.0950208	0.85518		integral component of membrane [GO:0016021]; plasma membrane [GO:0005886]	integral component of membrane [GO:0016021]; plasma membrane [GO:0005886]		SUBCELLULAR LOCATION: Cell inner membrane; Multi-pass membrane protein.
DEDD_ECOLI	P09549	Cell division protein DedD	dedD	33	22	-0.0234725	0.259072	cytokinetic process [GO:0032506]	cell division site [GO:0032153]; cell septum [GO:0030428]; integral component of plasma membrane [GO:0005887]	cell division site [GO:0032153]; cell septum [GO:0030428]; integral component of plasma membrane [GO:0005887]; peptidoglycan binding [GO:0042834]; cytokinetic process [GO:0032506]	peptidoglycan binding [GO:0042834]	SUBCELLULAR LOCATION: Cell inner membrane {ECO:0000255|HAMAP-Rule:MF_02022, ECO:0000305}; Single-pass membrane protein {ECO:0000255|HAMAP-Rule:MF_02022}. Note=Localizes at the septal ring. {ECO:0000255|HAMAP-Rule:MF_02022, ECO:0000269|PubMed:19684127, ECO:0000269|PubMed:19880599}.
DEF_ECOLI	P0A6K3	Peptide deformylase (PDF) (EC 3.5.1.88) (Polypeptide deformylase)	def	17	19	-0.0592796	-0.520701	co-translational protein modification [GO:0043686]; N-terminal protein amino acid modification [GO:0031365]; peptidyl-methionine modification [GO:0018206]; translation [GO:0006412]	cytosol [GO:0005829]	cytosol [GO:0005829]; ferrous iron binding [GO:0008198]; hydrolase activity [GO:0016787]; peptide deformylase activity [GO:0042586]; ribosome binding [GO:0043022]; zinc ion binding [GO:0008270]; co-translational protein modification [GO:0043686]; N-terminal protein amino acid modification [GO:0031365]; peptidyl-methionine modification [GO:0018206]; translation [GO:0006412]	ferrous iron binding [GO:0008198]; hydrolase activity [GO:0016787]; peptide deformylase activity [GO:0042586]; ribosome binding [GO:0043022]; zinc ion binding [GO:0008270]
DEGP_ECOLI	P0C0V0	Periplasmic serine endoprotease DegP (EC 3.4.21.107) (Heat shock protein DegP) (Protease Do)	degP	82	81	-0.166201	-0.0368884	chaperone-mediated protein folding [GO:0061077]; protein folding [GO:0006457]; protein quality control for misfolded or incompletely synthesized proteins [GO:0006515]; proteolysis [GO:0006508]; response to heat [GO:0009408]; response to oxidative stress [GO:0006979]; response to temperature stimulus [GO:0009266]	outer membrane-bounded periplasmic space [GO:0030288]; plasma membrane [GO:0005886]	outer membrane-bounded periplasmic space [GO:0030288]; plasma membrane [GO:0005886]; identical protein binding [GO:0042802]; peptidase activity [GO:0008233]; serine-type endopeptidase activity [GO:0004252]; serine-type peptidase activity [GO:0008236]; chaperone-mediated protein folding [GO:0061077]; protein folding [GO:0006457]; protein quality control for misfolded or incompletely synthesized pr…	identical protein binding [GO:0042802]; peptidase activity [GO:0008233]; serine-type endopeptidase activity [GO:0004252]; serine-type peptidase activity [GO:0008236]	SUBCELLULAR LOCATION: Cell inner membrane {ECO:0000269|PubMed:9083020}; Peripheral membrane protein {ECO:0000269|PubMed:9083020}; Cytoplasmic side {ECO:0000269|PubMed:9083020}.
DEGQ_ECOLI	P39099	Periplasmic pH-dependent serine endoprotease DegQ (EC 3.4.21.107) (Protease Do)	degQ	80	71	-0.064566	0.148987	proteolysis [GO:0006508]; proteolysis involved in cellular protein catabolic process [GO:0051603]	integral component of external side of plasma membrane [GO:0071575]; periplasmic space [GO:0042597]	integral component of external side of plasma membrane [GO:0071575]; periplasmic space [GO:0042597]; identical protein binding [GO:0042802]; peptidase activity [GO:0008233]; serine-type endopeptidase activity [GO:0004252]; proteolysis [GO:0006508]; proteolysis involved in cellular protein catabolic process [GO:0051603]	identical protein binding [GO:0042802]; peptidase activity [GO:0008233]; serine-type endopeptidase activity [GO:0004252]	SUBCELLULAR LOCATION: Periplasm {ECO:0000269|PubMed:8576051}.
DEGS_ECOLI	P0AEE3	Serine endoprotease DegS (EC 3.4.21.107) (Site-1 protease DegS) (S1P protease DegS) (Site-1-type intramembrane protease)	degS	5	11	-0.0289154	-0.124353	cellular response to misfolded protein [GO:0071218]; proteolysis [GO:0006508]	integral component of external side of plasma membrane [GO:0071575]; outer membrane-bounded periplasmic space [GO:0030288]	integral component of external side of plasma membrane [GO:0071575]; outer membrane-bounded periplasmic space [GO:0030288]; identical protein binding [GO:0042802]; peptidase activity [GO:0008233]; serine-type endopeptidase activity [GO:0004252]; serine-type peptidase activity [GO:0008236]; cellular response to misfolded protein [GO:0071218]; proteolysis [GO:0006508]	identical protein binding [GO:0042802]; peptidase activity [GO:0008233]; serine-type endopeptidase activity [GO:0004252]; serine-type peptidase activity [GO:0008236]	SUBCELLULAR LOCATION: Cell inner membrane {ECO:0000305|PubMed:11442831}; Single-pass membrane protein {ECO:0000305|PubMed:11442831}. Note=It is unclear how this protein is anchored to the inner membrane, programs predict a signal sequence, but replacing the N-terminal 26 residues with a known signal sequence gives a protein unable to fully complement a disruption mutant. {ECO:0000269|PubMed:11442…
DEOB_ECOLI	P0A6K6	Phosphopentomutase (EC 5.4.2.7) (Phosphodeoxyribomutase)	deoB	77	63	-0.119544	0.150413	5-phosphoribose 1-diphosphate biosynthetic process [GO:0006015]; cellular metabolic compound salvage [GO:0043094]; cellular response to DNA damage stimulus [GO:0006974]; deoxyribonucleotide catabolic process [GO:0009264]	cytosol [GO:0005829]	cytosol [GO:0005829]; magnesium ion binding [GO:0000287]; manganese ion binding [GO:0030145]; phosphopentomutase activity [GO:0008973]; 5-phosphoribose 1-diphosphate biosynthetic process [GO:0006015]; cellular metabolic compound salvage [GO:0043094]; cellular response to DNA damage stimulus [GO:0006974]; deoxyribonucleotide catabolic process [GO:0009264]	magnesium ion binding [GO:0000287]; manganese ion binding [GO:0030145]; phosphopentomutase activity [GO:0008973]	SUBCELLULAR LOCATION: Cytoplasm.
DEOC_ECOLI	P0A6L0	Deoxyribose-phosphate aldolase (DERA) (EC 4.1.2.4) (2-deoxy-D-ribose 5-phosphate aldolase) (Phosphodeoxyriboaldolase) (Deoxyriboaldolase)	deoC	46	40	-0.0709264	0.37919	carbohydrate catabolic process [GO:0016052]; cellular response to DNA damage stimulus [GO:0006974]; deoxyribonucleotide catabolic process [GO:0009264]; deoxyribose phosphate catabolic process [GO:0046386]; nucleobase-containing small molecule interconversion [GO:0015949]	cytosol [GO:0005829]; membrane [GO:0016020]	cytosol [GO:0005829]; membrane [GO:0016020]; deoxyribose-phosphate aldolase activity [GO:0004139]; lyase activity [GO:0016829]; carbohydrate catabolic process [GO:0016052]; cellular response to DNA damage stimulus [GO:0006974]; deoxyribonucleotide catabolic process [GO:0009264]; deoxyribose phosphate catabolic process [GO:0046386]; nucleobase-containing small molecule interconversion [GO:0015949]	deoxyribose-phosphate aldolase activity [GO:0004139]; lyase activity [GO:0016829]	SUBCELLULAR LOCATION: Cytoplasm {ECO:0000255|HAMAP-Rule:MF_00592, ECO:0000305}.
DEOD_ECOLI	P0ABP8	Purine nucleoside phosphorylase DeoD-type (PNP) (EC 2.4.2.1)	deoD	102	88	-0.050672	0.212181	cellular response to DNA damage stimulus [GO:0006974]; purine nucleoside catabolic process [GO:0006152]; purine nucleoside interconversion [GO:0019686]	cytosol [GO:0005829]; membrane [GO:0016020]	cytosol [GO:0005829]; membrane [GO:0016020]; guanosine phosphorylase activity [GO:0047975]; identical protein binding [GO:0042802]; purine-nucleoside phosphorylase activity [GO:0004731]; cellular response to DNA damage stimulus [GO:0006974]; purine nucleoside catabolic process [GO:0006152]; purine nucleoside interconversion [GO:0019686]	guanosine phosphorylase activity [GO:0047975]; identical protein binding [GO:0042802]; purine-nucleoside phosphorylase activity [GO:0004731]
DEOR_ECOLI	P0ACK5	Deoxyribose operon repressor	deoR	6	3	-0.0180871	-0.357259	negative regulation of DNA-templated transcription, initiation [GO:2000143]		bacterial-type cis-regulatory region sequence-specific DNA binding [GO:0000986]; DNA-binding transcription factor activity [GO:0003700]; negative regulation of DNA-templated transcription, initiation [GO:2000143]	bacterial-type cis-regulatory region sequence-specific DNA binding [GO:0000986]; DNA-binding transcription factor activity [GO:0003700]
DER_ECOLI	P0A6P5	GTPase Der (Double era-like domain protein) (GTP-binding protein EngA)	der	86	72	0.0005915	0.611212	ribosomal large subunit assembly [GO:0000027]	cytosol [GO:0005829]	cytosol [GO:0005829]; GTP binding [GO:0005525]; GTPase activating protein binding [GO:0032794]; GTPase activity [GO:0003924]; guanosine tetraphosphate binding [GO:0097216]; ribosomal large subunit binding [GO:0043023]; ribosome binding [GO:0043022]; ribosomal large subunit assembly [GO:0000027]	GTPase activating protein binding [GO:0032794]; GTPase activity [GO:0003924]; GTP binding [GO:0005525]; guanosine tetraphosphate binding [GO:0097216]; ribosomal large subunit binding [GO:0043023]; ribosome binding [GO:0043022]
DGAL_ECOLI	P0AEE5	D-galactose-binding periplasmic protein (GBP) (D-galactose/ D-glucose-binding protein) (GGBP)	mglB	103	171	0.561649	0.200757	chemotaxis [GO:0006935]; galactose transmembrane transport [GO:0015757]; methylgalactoside transport [GO:0015765]	outer membrane-bounded periplasmic space [GO:0030288]	outer membrane-bounded periplasmic space [GO:0030288]; carbohydrate binding [GO:0030246]; metal ion binding [GO:0046872]; chemotaxis [GO:0006935]; galactose transmembrane transport [GO:0015757]; methylgalactoside transport [GO:0015765]	carbohydrate binding [GO:0030246]; metal ion binding [GO:0046872]	SUBCELLULAR LOCATION: Periplasm.
DGCI_ECOLI	P75801	Probable diguanylate cyclase DgcI (DGC) (EC 2.7.7.65) (Putative lipoprotein DgcI)	dgcI	3	3	-0.180834	0.0245022	cell adhesion involved in single-species biofilm formation [GO:0043709]; negative regulation of bacterial-type flagellum-dependent cell motility [GO:1902201]	integral component of membrane [GO:0016021]; plasma membrane [GO:0005886]	integral component of membrane [GO:0016021]; plasma membrane [GO:0005886]; diguanylate cyclase activity [GO:0052621]; GTP binding [GO:0005525]; metal ion binding [GO:0046872]; cell adhesion involved in single-species biofilm formation [GO:0043709]; negative regulation of bacterial-type flagellum-dependent cell motility [GO:1902201]	diguanylate cyclase activity [GO:0052621]; GTP binding [GO:0005525]; metal ion binding [GO:0046872]	SUBCELLULAR LOCATION: Cell membrane {ECO:0000255|PROSITE-ProRule:PRU00303}; Lipid-anchor {ECO:0000255|PROSITE-ProRule:PRU00303}.
DGCJ_ECOLI	P76237	Probable diguanylate cyclase DgcJ (DGC) (EC 2.7.7.65)	dgcJ	1	4	0.123393	0.389091	cell adhesion involved in single-species biofilm formation [GO:0043709]; negative regulation of bacterial-type flagellum-dependent cell motility [GO:1902201]	integral component of membrane [GO:0016021]; plasma membrane [GO:0005886]	integral component of membrane [GO:0016021]; plasma membrane [GO:0005886]; diguanylate cyclase activity [GO:0052621]; GTP binding [GO:0005525]; metal ion binding [GO:0046872]; cell adhesion involved in single-species biofilm formation [GO:0043709]; negative regulation of bacterial-type flagellum-dependent cell motility [GO:1902201]	diguanylate cyclase activity [GO:0052621]; GTP binding [GO:0005525]; metal ion binding [GO:0046872]	SUBCELLULAR LOCATION: Cell inner membrane {ECO:0000305}; Multi-pass membrane protein {ECO:0000255}.
DGCM_ECOLI	P77302	Diguanylate cyclase DgcM (DGC) (EC 2.7.7.65)	dgcM	13	12	-0.158896	-1.14484	cell adhesion involved in single-species biofilm formation [GO:0043709]; negative regulation of bacterial-type flagellum-dependent cell motility [GO:1902201]; positive regulation of DNA-binding transcription factor activity [GO:0051091]; positive regulation of single-species biofilm formation on inanimate substrate [GO:1900233]	plasma membrane [GO:0005886]	plasma membrane [GO:0005886]; diguanylate cyclase activity [GO:0052621]; GTP binding [GO:0005525]; identical protein binding [GO:0042802]; metal ion binding [GO:0046872]; cell adhesion involved in single-species biofilm formation [GO:0043709]; negative regulation of bacterial-type flagellum-dependent cell motility [GO:1902201]; positive regulation of DNA-binding transcription factor activity [GO:…	diguanylate cyclase activity [GO:0052621]; GTP binding [GO:0005525]; identical protein binding [GO:0042802]; metal ion binding [GO:0046872]
DGCP_ECOLI	P76245	Diguanylate cyclase DgcP (DGC) (EC 2.7.7.65)	dgcP	4	4	0.0426542	-0.560836			diguanylate cyclase activity [GO:0052621]; GTP binding [GO:0005525]; metal ion binding [GO:0046872]	diguanylate cyclase activity [GO:0052621]; GTP binding [GO:0005525]; metal ion binding [GO:0046872]
DGCQ_ECOLI	P76330	Probable diguanylate cyclase DgcQ (DGC) (EC 2.7.7.65) (Cellulose synthesis regulatory protein)	dgcQ	2	1	-0.0591772	-0.0971034	cell adhesion involved in single-species biofilm formation [GO:0043709]; cellulose biosynthetic process [GO:0030244]; negative regulation of bacterial-type flagellum-dependent cell motility [GO:1902201]	integral component of membrane [GO:0016021]; plasma membrane [GO:0005886]	integral component of membrane [GO:0016021]; plasma membrane [GO:0005886]; diguanylate cyclase activity [GO:0052621]; GTP binding [GO:0005525]; metal ion binding [GO:0046872]; cell adhesion involved in single-species biofilm formation [GO:0043709]; cellulose biosynthetic process [GO:0030244]; negative regulation of bacterial-type flagellum-dependent cell motility [GO:1902201]	diguanylate cyclase activity [GO:0052621]; GTP binding [GO:0005525]; metal ion binding [GO:0046872]	SUBCELLULAR LOCATION: Cell inner membrane {ECO:0000305}; Multi-pass membrane protein {ECO:0000255}.
DGOR_ECOLI	P31460	Galactonate operon transcriptional repressor	dgoR	5	12	-0.0177026	-0.796917	negative regulation of cellular carbohydrate metabolic process [GO:0010677]; negative regulation of DNA-templated transcription, initiation [GO:2000143]		bacterial-type cis-regulatory region sequence-specific DNA binding [GO:0000986]; DNA binding [GO:0003677]; DNA-binding transcription repressor activity [GO:0001217]; identical protein binding [GO:0042802]; ligand-activated transcription factor activity [GO:0098531]; negative regulation of cellular carbohydrate metabolic process [GO:0010677]; negative regulation of DNA-templated transcription, ini…	bacterial-type cis-regulatory region sequence-specific DNA binding [GO:0000986]; DNA binding [GO:0003677]; DNA-binding transcription repressor activity [GO:0001217]; identical protein binding [GO:0042802]; ligand-activated transcription factor activity [GO:0098531]
DGTP_ECOLI	P15723	Deoxyguanosinetriphosphate triphosphohydrolase (dGTP triphosphohydrolase) (dGTPase) (EC 3.1.5.1)	dgt	5	3	-0.0592703	0.0182327	dGTP catabolic process [GO:0006203]; nucleobase-containing small molecule interconversion [GO:0015949]		cobalt ion binding [GO:0050897]; dGTPase activity [GO:0008832]; GTPase activity [GO:0003924]; identical protein binding [GO:0042802]; magnesium ion binding [GO:0000287]; manganese ion binding [GO:0030145]; single-stranded DNA binding [GO:0003697]; dGTP catabolic process [GO:0006203]; nucleobase-containing small molecule interconversion [GO:0015949]	cobalt ion binding [GO:0050897]; dGTPase activity [GO:0008832]; GTPase activity [GO:0003924]; identical protein binding [GO:0042802]; magnesium ion binding [GO:0000287]; manganese ion binding [GO:0030145]; single-stranded DNA binding [GO:0003697]
DHAK_ECOLI	P76015	PEP-dependent dihydroxyacetone kinase, dihydroxyacetone-binding subunit DhaK (EC 2.7.1.121)	dhaK	58	53	0.162463	-0.67664	cellular response to DNA damage stimulus [GO:0006974]; glycerol catabolic process [GO:0019563]; glycerol to glycerone phosphate metabolic process [GO:0061610]; ketone catabolic process [GO:0042182]; monosaccharide catabolic process [GO:0046365]	cytosol [GO:0005829]	cytosol [GO:0005829]; glycerone kinase activity [GO:0004371]; identical protein binding [GO:0042802]; phosphoenolpyruvate-glycerone phosphotransferase activity [GO:0047324]; cellular response to DNA damage stimulus [GO:0006974]; glycerol catabolic process [GO:0019563]; glycerol to glycerone phosphate metabolic process [GO:0061610]; ketone catabolic process [GO:0042182]; monosaccharide catabolic p…	glycerone kinase activity [GO:0004371]; identical protein binding [GO:0042802]; phosphoenolpyruvate-glycerone phosphotransferase activity [GO:0047324]
DHAL_ECOLI	P76014	PEP-dependent dihydroxyacetone kinase, ADP-binding subunit DhaL (EC 2.7.1.121)	dhaL	34	39	0.174314	-0.520626	glycerol catabolic process [GO:0019563]	cytosol [GO:0005829]	cytosol [GO:0005829]; ADP binding [GO:0043531]; ATP binding [GO:0005524]; glycerone kinase activity [GO:0004371]; magnesium ion binding [GO:0000287]; phosphoenolpyruvate-glycerone phosphotransferase activity [GO:0047324]; glycerol catabolic process [GO:0019563]	ADP binding [GO:0043531]; ATP binding [GO:0005524]; glycerone kinase activity [GO:0004371]; magnesium ion binding [GO:0000287]; phosphoenolpyruvate-glycerone phosphotransferase activity [GO:0047324]	SUBCELLULAR LOCATION: Cytoplasm {ECO:0000305}.
DHAM_ECOLI	P37349	PEP-dependent dihydroxyacetone kinase, phosphoryl donor subunit DhaM (EC 2.7.1.121) (Dihydroxyacetone kinase subunit M)	dhaM	45	56	0.138662	-0.532971	cellular response to DNA damage stimulus [GO:0006974]; glycerol catabolic process [GO:0019563]; phosphoenolpyruvate-dependent sugar phosphotransferase system [GO:0009401]	cytosol [GO:0005829]; integral component of membrane [GO:0016021]	cytosol [GO:0005829]; integral component of membrane [GO:0016021]; phosphoenolpyruvate-glycerone phosphotransferase activity [GO:0047324]; cellular response to DNA damage stimulus [GO:0006974]; glycerol catabolic process [GO:0019563]; phosphoenolpyruvate-dependent sugar phosphotransferase system [GO:0009401]	phosphoenolpyruvate-glycerone phosphotransferase activity [GO:0047324]
DHAS_ECOLI	P0A9Q9	Aspartate-semialdehyde dehydrogenase (ASA dehydrogenase) (ASADH) (EC 1.2.1.11) (Aspartate-beta-semialdehyde dehydrogenase)	asd	79	76	-0.0585669	-0.420548	'de novo' L-methionine biosynthetic process [GO:0071266]; cellular response to DNA damage stimulus [GO:0006974]; diaminopimelate biosynthetic process [GO:0019877]; homoserine biosynthetic process [GO:0009090]; isoleucine biosynthetic process [GO:0009097]; lysine biosynthetic process via diaminopimelate [GO:0009089]; threonine biosynthetic process [GO:0009088]	cytosol [GO:0005829]	cytosol [GO:0005829]; aspartate-semialdehyde dehydrogenase activity [GO:0004073]; NAD binding [GO:0051287]; NADP binding [GO:0050661]; protein dimerization activity [GO:0046983]; 'de novo' L-methionine biosynthetic process [GO:0071266]; cellular response to DNA damage stimulus [GO:0006974]; diaminopimelate biosynthetic process [GO:0019877]; homoserine biosynthetic process [GO:0009090]; isoleucine…	aspartate-semialdehyde dehydrogenase activity [GO:0004073]; NAD binding [GO:0051287]; NADP binding [GO:0050661]; protein dimerization activity [GO:0046983]
DHE4_ECOLI	P00370	NADP-specific glutamate dehydrogenase (NADP-GDH) (EC 1.4.1.4)	gdhA	33	49	0.0590528	-0.697045	glutamate biosynthetic process [GO:0006537]	cytoplasm [GO:0005737]; cytosol [GO:0005829]	cytoplasm [GO:0005737]; cytosol [GO:0005829]; glutamate dehydrogenase (NADP+) activity [GO:0004354]; identical protein binding [GO:0042802]; glutamate biosynthetic process [GO:0006537]	glutamate dehydrogenase (NADP+) activity [GO:0004354]; identical protein binding [GO:0042802]
DHG_ECOLI	P15877	Quinoprotein glucose dehydrogenase (EC 1.1.5.2) (Glucose dehydrogenase [pyrroloquinoline-quinone])	gcd	27	54	0.0930649	0.258735		integral component of membrane [GO:0016021]; outer membrane-bounded periplasmic space [GO:0030288]; plasma membrane [GO:0005886]	integral component of membrane [GO:0016021]; outer membrane-bounded periplasmic space [GO:0030288]; plasma membrane [GO:0005886]; magnesium ion binding [GO:0000287]; pyrroloquinoline quinone binding [GO:0070968]; quinoprotein glucose dehydrogenase activity [GO:0008876]; ubiquinone binding [GO:0048039]	magnesium ion binding [GO:0000287]; pyrroloquinoline quinone binding [GO:0070968]; quinoprotein glucose dehydrogenase activity [GO:0008876]; ubiquinone binding [GO:0048039]	SUBCELLULAR LOCATION: Cell inner membrane {ECO:0000269|PubMed:15919996, ECO:0000269|PubMed:16079137}; Multi-pass membrane protein {ECO:0000269|PubMed:15919996, ECO:0000269|PubMed:16079137}; Periplasmic side {ECO:0000269|PubMed:15919996, ECO:0000269|PubMed:16079137}.
DHPS_ECOLI	P0AC13	Dihydropteroate synthase (DHPS) (EC 2.5.1.15) (Dihydropteroate pyrophosphorylase)	folP	28	28	-0.0124725	-0.258951	folic acid biosynthetic process [GO:0046656]; response to drug [GO:0042493]; tetrahydrofolate biosynthetic process [GO:0046654]	cytoplasm [GO:0005737]; cytosol [GO:0005829]	cytoplasm [GO:0005737]; cytosol [GO:0005829]; dihydropteroate synthase activity [GO:0004156]; metal ion binding [GO:0046872]; folic acid biosynthetic process [GO:0046656]; response to drug [GO:0042493]; tetrahydrofolate biosynthetic process [GO:0046654]	dihydropteroate synthase activity [GO:0004156]; metal ion binding [GO:0046872]
DHSD_ECOLI	P0AC44	Succinate dehydrogenase hydrophobic membrane anchor subunit	sdhD	10	9	0.0455702	-0.435788	aerobic respiration [GO:0009060]; cytochrome complex assembly [GO:0017004]; tricarboxylic acid cycle [GO:0006099]	integral component of membrane [GO:0016021]; plasma membrane [GO:0005886]	integral component of membrane [GO:0016021]; plasma membrane [GO:0005886]; electron transfer activity [GO:0009055]; heme binding [GO:0020037]; metal ion binding [GO:0046872]; succinate dehydrogenase activity [GO:0000104]; aerobic respiration [GO:0009060]; cytochrome complex assembly [GO:0017004]; tricarboxylic acid cycle [GO:0006099]	electron transfer activity [GO:0009055]; heme binding [GO:0020037]; metal ion binding [GO:0046872]; succinate dehydrogenase activity [GO:0000104]	SUBCELLULAR LOCATION: Cell inner membrane {ECO:0000269|PubMed:15919996}; Multi-pass membrane protein {ECO:0000269|PubMed:15919996}.
DIAA_ECOLI	P66817	DnaA initiator-associating protein DiaA	diaA	9	5	-0.0673228	-0.285299	carbohydrate derivative metabolic process [GO:1901135]; DNA replication [GO:0006260]; positive regulation of DNA-dependent DNA replication initiation [GO:0032298]		carbohydrate derivative binding [GO:0097367]; identical protein binding [GO:0042802]; carbohydrate derivative metabolic process [GO:1901135]; DNA replication [GO:0006260]; positive regulation of DNA-dependent DNA replication initiation [GO:0032298]	carbohydrate derivative binding [GO:0097367]; identical protein binding [GO:0042802]
DICA_ECOLI	P06966	HTH-type transcriptional regulator DicA (Repressor protein of division inhibition gene dicA)	dicA	5	3	0.069688	-0.291458	cell cycle [GO:0007049]; cell division [GO:0051301]; transcription, DNA-templated [GO:0006351]		DNA binding [GO:0003677]; cell cycle [GO:0007049]; cell division [GO:0051301]; transcription, DNA-templated [GO:0006351]	DNA binding [GO:0003677]
DIGH_ECOLI	P64426	Glycosyl hydrolase DigH (EC 3.2.1.-) (Divisome-localized glycosyl hydrolase)	digH	7	5	-0.148879	-0.291559	cell wall organization [GO:0071555]; metabolic process [GO:0008152]	cell outer membrane [GO:0009279]	cell outer membrane [GO:0009279]; hydrolase activity, acting on glycosyl bonds [GO:0016798]; cell wall organization [GO:0071555]; metabolic process [GO:0008152]	hydrolase activity, acting on glycosyl bonds [GO:0016798]	SUBCELLULAR LOCATION: Cell outer membrane {ECO:0000269|PubMed:32152098}; Lipid-anchor {ECO:0000255|PROSITE-ProRule:PRU00303}. Note=Localizes to the divisome. {ECO:0000269|PubMed:32152098}.
DING_ECOLI	P27296	ATP-dependent DNA helicase DinG (EC 3.6.4.12)	dinG	1	3	0.187946	0.244099	DNA duplex unwinding [GO:0032508]; DNA recombination [GO:0006310]; DNA repair [GO:0006281]; SOS response [GO:0009432]		4 iron, 4 sulfur cluster binding [GO:0051539]; ATP binding [GO:0005524]; ATP hydrolysis activity [GO:0140603]; DNA binding [GO:0003677]; DNA helicase activity [GO:0003678]; DNA/RNA helicase activity [GO:0033677]; metal ion binding [GO:0046872]; DNA duplex unwinding [GO:0032508]; DNA recombination [GO:0006310]; DNA repair [GO:0006281]; SOS response [GO:0009432]	4 iron, 4 sulfur cluster binding [GO:0051539]; ATP binding [GO:0005524]; ATP hydrolysis activity [GO:0140603]; DNA/RNA helicase activity [GO:0033677]; DNA binding [GO:0003677]; DNA helicase activity [GO:0003678]; metal ion binding [GO:0046872]
DINI_ECOLI	P0ABR1	DNA damage-inducible protein I	dinI	9	11	0.185084	-0.274096	DNA repair [GO:0006281]; SOS response [GO:0009432]		enzyme binding [GO:0019899]; DNA repair [GO:0006281]; SOS response [GO:0009432]	enzyme binding [GO:0019899]
DINJ_ECOLI	Q47150	Antitoxin DinJ	dinJ	6	6	-0.0253829	-1.40876	negative regulation of DNA-templated transcription, initiation [GO:2000143]; single-species biofilm formation [GO:0044010]; transcription, DNA-templated [GO:0006351]		bacterial-type cis-regulatory region sequence-specific DNA binding [GO:0000986]; DNA binding [GO:0003677]; toxic substance binding [GO:0015643]; negative regulation of DNA-templated transcription, initiation [GO:2000143]; single-species biofilm formation [GO:0044010]; transcription, DNA-templated [GO:0006351]	bacterial-type cis-regulatory region sequence-specific DNA binding [GO:0000986]; DNA binding [GO:0003677]; toxic substance binding [GO:0015643]
DJLA_ECOLI	P31680	Co-chaperone protein DjlA (DnaJ-like protein DjlA)	djlA	12	13	0.0493717	-0.246989		integral component of membrane [GO:0016021]; membrane [GO:0016020]; plasma membrane [GO:0005886]	integral component of membrane [GO:0016021]; membrane [GO:0016020]; plasma membrane [GO:0005886]; chaperone binding [GO:0051087]	chaperone binding [GO:0051087]	SUBCELLULAR LOCATION: Cell inner membrane {ECO:0000255|HAMAP-Rule:MF_01153, ECO:0000269|PubMed:11106641, ECO:0000269|PubMed:8809778, ECO:0000269|PubMed:9364917}; Single-pass type III membrane protein {ECO:0000255|HAMAP-Rule:MF_01153, ECO:0000269|PubMed:11106641, ECO:0000269|PubMed:8809778, ECO:0000269|PubMed:9364917}.
DKGA_ECOLI	Q46857	2,5-diketo-D-gluconic acid reductase A (2,5-DKG reductase A) (2,5-DKGR A) (25DKGR-A) (EC 1.1.1.274) (AKR5C)	dkgA	57	65	-0.0910965	-0.16413	L-ascorbic acid biosynthetic process [GO:0019853]; methylglyoxal catabolic process [GO:0051596]	cytosol [GO:0005829]	cytosol [GO:0005829]; 2,5-didehydrogluconate reductase activity [GO:0050580]; alcohol dehydrogenase (NADP+) activity [GO:0008106]; alditol:NADP+ 1-oxidoreductase activity [GO:0004032]; D-threo-aldose 1-dehydrogenase activity [GO:0047834]; oxidoreductase activity, acting on the CH-OH group of donors, NAD or NADP as acceptor [GO:0016616]; L-ascorbic acid biosynthetic process [GO:0019853]; methylgly…	2,5-didehydrogluconate reductase activity [GO:0050580]; alcohol dehydrogenase (NADP+) activity [GO:0008106]; alditol:NADP+ 1-oxidoreductase activity [GO:0004032]; D-threo-aldose 1-dehydrogenase activity [GO:0047834]; oxidoreductase activity, acting on the CH-OH group of donors, NAD or NADP as acceptor [GO:0016616]	SUBCELLULAR LOCATION: Cytoplasm {ECO:0000250}.
DKGB_ECOLI	P30863	2,5-diketo-D-gluconic acid reductase B (2,5-DKG reductase B) (2,5-DKGR B) (25DKGR-B) (EC 1.1.1.346) (AKR5D)	dkgB	30	25	-0.0134316	-0.187829	L-ascorbic acid biosynthetic process [GO:0019853]; methylglyoxal catabolic process [GO:0051596]	cytoplasm [GO:0005737]	cytoplasm [GO:0005737]; aldo-keto reductase (NADP) activity [GO:0004033]; aryl-alcohol dehydrogenase (NADP+) activity [GO:0047681]; D-threo-aldose 1-dehydrogenase activity [GO:0047834]; methylglyoxal reductase (NADPH-dependent, acetol producing) [GO:1990002]; L-ascorbic acid biosynthetic process [GO:0019853]; methylglyoxal catabolic process [GO:0051596]	aldo-keto reductase (NADP) activity [GO:0004033]; aryl-alcohol dehydrogenase (NADP+) activity [GO:0047681]; D-threo-aldose 1-dehydrogenase activity [GO:0047834]; methylglyoxal reductase (NADPH-dependent, acetol producing) [GO:1990002]	SUBCELLULAR LOCATION: Cytoplasm {ECO:0000250}.
DKSA_ECOLI	P0ABS1	RNA polymerase-binding transcription factor DksA (DnaK suppressor protein)	dksA	23	18	0.0534835	0.351054	double-strand break repair [GO:0006302]; regulation of gene expression [GO:0010468]	cytoplasm [GO:0005737]; cytosol [GO:0005829]	cytoplasm [GO:0005737]; cytosol [GO:0005829]; zinc ion binding [GO:0008270]; double-strand break repair [GO:0006302]; regulation of gene expression [GO:0010468]	zinc ion binding [GO:0008270]	SUBCELLULAR LOCATION: Cytoplasm {ECO:0000255|HAMAP-Rule:MF_00926, ECO:0000269|PubMed:16858726}.
DLDH_ECOLI	P0A9P0	Dihydrolipoyl dehydrogenase (EC 1.8.1.4) (Dihydrolipoamide dehydrogenase) (E3 component of pyruvate and 2-oxoglutarate dehydrogenases complexes) (Glycine cleavage system L protein)	lpdA	239	177	0.0501578	0.453646	2-oxoglutarate metabolic process [GO:0006103]; cell redox homeostasis [GO:0045454]; glycine decarboxylation via glycine cleavage system [GO:0019464]; glycolytic process [GO:0006096]; pyruvate metabolic process [GO:0006090]; response to oxidative stress [GO:0006979]	cytoplasm [GO:0005737]; cytosol [GO:0005829]; cytosolic pyruvate dehydrogenase complex [GO:0045250]; membrane [GO:0016020]; plasma membrane [GO:0005886]	cytoplasm [GO:0005737]; cytosol [GO:0005829]; cytosolic pyruvate dehydrogenase complex [GO:0045250]; membrane [GO:0016020]; plasma membrane [GO:0005886]; dihydrolipoyl dehydrogenase activity [GO:0004148]; disulfide oxidoreductase activity [GO:0015036]; flavin adenine dinucleotide binding [GO:0050660]; identical protein binding [GO:0042802]; zinc ion binding [GO:0008270]; 2-oxoglutarate metabolic …	dihydrolipoyl dehydrogenase activity [GO:0004148]; disulfide oxidoreductase activity [GO:0015036]; flavin adenine dinucleotide binding [GO:0050660]; identical protein binding [GO:0042802]; zinc ion binding [GO:0008270]	SUBCELLULAR LOCATION: Cytoplasm {ECO:0000269|PubMed:16079137}. Cell inner membrane {ECO:0000269|PubMed:16079137}; Peripheral membrane protein {ECO:0000269|PubMed:16079137}.
DLD_ECOLI	P06149	Quinone-dependent D-lactate dehydrogenase (EC 1.1.5.12) ((R)-lactate:quinone 2-oxidoreductase) (D-lactate dehydrogenase) (D-LDH) (Respiratory D-lactate dehydrogenase)	dld	63	58	-0.0913269	-0.880194	aerobic respiration [GO:0009060]; anaerobic respiration [GO:0009061]; lactate oxidation [GO:0019516]; respiratory electron transport chain [GO:0022904]; transmembrane transport [GO:0055085]	extrinsic component of cytoplasmic side of plasma membrane [GO:0031234]; integral component of plasma membrane [GO:0005887]; plasma membrane [GO:0005886]	extrinsic component of cytoplasmic side of plasma membrane [GO:0031234]; integral component of plasma membrane [GO:0005887]; plasma membrane [GO:0005886]; D-lactate dehydrogenase (quinone) activity [GO:0102029]; electron transfer activity [GO:0009055]; FAD binding [GO:0071949]; flavin adenine dinucleotide binding [GO:0050660]; oxidoreductase activity, acting on the CH-OH group of donors, quinone …	D-lactate dehydrogenase (quinone) activity [GO:0102029]; electron transfer activity [GO:0009055]; FAD binding [GO:0071949]; flavin adenine dinucleotide binding [GO:0050660]; oxidoreductase activity, acting on the CH-OH group of donors, quinone or similar compound as acceptor [GO:0016901]; quinone binding [GO:0048038]	SUBCELLULAR LOCATION: Cell inner membrane {ECO:0000255|HAMAP-Rule:MF_02092, ECO:0000269|PubMed:1092688, ECO:0000269|PubMed:4575624, ECO:0000269|PubMed:4582730}; Peripheral membrane protein {ECO:0000255|HAMAP-Rule:MF_02092, ECO:0000269|PubMed:1092688}; Cytoplasmic side {ECO:0000255|HAMAP-Rule:MF_02092, ECO:0000269|PubMed:1092688}. Note=May bind the membrane through electrostatic rather than hydrop…
DLHH_ECOLI	P56262	Putative carboxymethylenebutenolidase (EC 3.1.1.45) (Dienelactone hydrolase) (DLH)	ysgA	16	15	-0.106175	-0.908363			carboxymethylenebutenolidase activity [GO:0008806]	carboxymethylenebutenolidase activity [GO:0008806]
DMA_ECOLI	P0AEE8	DNA adenine methylase (EC 2.1.1.72) (DNA adenine methyltransferase) (Deoxyadenosyl-methyltransferase) (M.EcoDam)	dam	2	2	-0.0386401	-0.345544	bacterial-type DNA replication initiation [GO:1902328]; DNA-dependent DNA replication [GO:0006261]; DNA methylation on adenine [GO:0032775]; mismatch repair [GO:0006298]; response to UV [GO:0009411]		S-adenosyl-L-methionine binding [GO:1904047]; sequence-specific DNA binding [GO:0043565]; site-specific DNA-methyltransferase (adenine-specific) activity [GO:0009007]; bacterial-type DNA replication initiation [GO:1902328]; DNA methylation on adenine [GO:0032775]; DNA-dependent DNA replication [GO:0006261]; mismatch repair [GO:0006298]; response to UV [GO:0009411]	S-adenosyl-L-methionine binding [GO:1904047]; sequence-specific DNA binding [GO:0043565]; site-specific DNA-methyltransferase (adenine-specific) activity [GO:0009007]
DMLA_ECOLI	P76251	D-malate dehydrogenase [decarboxylating] (EC 1.1.1.83) (D-malate degradation protein A) (D-malate oxidase)	dmlA	2	4	-0.016859	0.0201746	malate metabolic process [GO:0006108]	cytoplasm [GO:0005737]	cytoplasm [GO:0005737]; 3-isopropylmalate dehydrogenase activity [GO:0003862]; D-malate dehydrogenase (decarboxylating) activity [GO:0046553]; magnesium ion binding [GO:0000287]; NAD binding [GO:0051287]; tartrate dehydrogenase activity [GO:0009027]; malate metabolic process [GO:0006108]	3-isopropylmalate dehydrogenase activity [GO:0003862]; D-malate dehydrogenase (decarboxylating) activity [GO:0046553]; magnesium ion binding [GO:0000287]; NAD binding [GO:0051287]; tartrate dehydrogenase activity [GO:0009027]	SUBCELLULAR LOCATION: Cytoplasm {ECO:0000250}.
DMLR_ECOLI	P76250	HTH-type transcriptional regulator DmlR (D-malate degradation protein R)	dmlR	2	2	0.0504834	-1.63404	malate metabolic process [GO:0006108]; negative regulation of transcription, DNA-templated [GO:0045892]; positive regulation of transcription, DNA-templated [GO:0045893]; transcription, DNA-templated [GO:0006351]		DNA-binding transcription factor activity [GO:0003700]; sequence-specific DNA binding [GO:0043565]; malate metabolic process [GO:0006108]; negative regulation of transcription, DNA-templated [GO:0045892]; positive regulation of transcription, DNA-templated [GO:0045893]; transcription, DNA-templated [GO:0006351]	DNA-binding transcription factor activity [GO:0003700]; sequence-specific DNA binding [GO:0043565]
DMSD_ECOLI	P69853	Tat proofreading chaperone DmsD (DMSO reductase maturation protein) (Twin-arginine leader-binding protein DmsD)	dmsD	10	6	-0.0333052	0.407887	chaperone-mediated protein folding [GO:0061077]	cytoplasm [GO:0005737]; extrinsic component of cytoplasmic side of plasma membrane [GO:0031234]	cytoplasm [GO:0005737]; extrinsic component of cytoplasmic side of plasma membrane [GO:0031234]; signal sequence binding [GO:0005048]; chaperone-mediated protein folding [GO:0061077]	signal sequence binding [GO:0005048]	SUBCELLULAR LOCATION: Cell inner membrane {ECO:0000269|PubMed:12813051}; Peripheral membrane protein {ECO:0000269|PubMed:12813051}. Cytoplasm {ECO:0000269|PubMed:12813051}. Note=Mainly cytoplasmic under aerobic conditions, and found in the inner membrane under anaerobic conditions.
DNAA_ECOLI	P03004	Chromosomal replication initiator protein DnaA	dnaA	38	35	0.0322134	-0.172115	DNA replication [GO:0006260]; DNA replication initiation [GO:0006270]; negative regulation of DNA replication [GO:0008156]; regulation of DNA replication [GO:0006275]	cytoplasmic side of plasma membrane [GO:0009898]; cytosol [GO:0005829]; plasma membrane [GO:0005886]	cytoplasmic side of plasma membrane [GO:0009898]; cytosol [GO:0005829]; plasma membrane [GO:0005886]; ATP binding [GO:0005524]; DNA binding [GO:0003677]; DNA replication origin binding [GO:0003688]; identical protein binding [GO:0042802]; sequence-specific DNA binding [GO:0043565]; DNA replication [GO:0006260]; DNA replication initiation [GO:0006270]; negative regulation of DNA replication [GO:00…	ATP binding [GO:0005524]; DNA binding [GO:0003677]; DNA replication origin binding [GO:0003688]; identical protein binding [GO:0042802]; sequence-specific DNA binding [GO:0043565]	SUBCELLULAR LOCATION: Cytoplasm.
DNAB_ECOLI	P0ACB0	Replicative DNA helicase (EC 3.6.4.12)	dnaB	38	41	-0.00191386	0.0547802	DNA replication [GO:0006260]; DNA replication, synthesis of RNA primer [GO:0006269]; DNA unwinding involved in DNA replication [GO:0006268]; response to ionizing radiation [GO:0010212]	cytosol [GO:0005829]; primosome complex [GO:1990077]	cytosol [GO:0005829]; primosome complex [GO:1990077]; ATP binding [GO:0005524]; ATP hydrolysis activity [GO:0140603]; DNA binding [GO:0003677]; DNA helicase activity [GO:0003678]; helicase activity [GO:0004386]; identical protein binding [GO:0042802]; DNA replication [GO:0006260]; DNA replication, synthesis of RNA primer [GO:0006269]; DNA unwinding involved in DNA replication [GO:0006268]; respon…	ATP binding [GO:0005524]; ATP hydrolysis activity [GO:0140603]; DNA binding [GO:0003677]; DNA helicase activity [GO:0003678]; helicase activity [GO:0004386]; identical protein binding [GO:0042802]
DNAC_ECOLI	P0AEF0	DNA replication protein DnaC	dnaC	6	10	0.0152828	0.259008	DNA replication [GO:0006260]; DNA replication, synthesis of RNA primer [GO:0006269]; DNA strand elongation involved in DNA replication [GO:0006271]	primosome complex [GO:1990077]	primosome complex [GO:1990077]; ATP binding [GO:0005524]; DNA replication [GO:0006260]; DNA replication, synthesis of RNA primer [GO:0006269]; DNA strand elongation involved in DNA replication [GO:0006271]	ATP binding [GO:0005524]
DNAG_ECOLI	P0ABS5	DNA primase (EC 2.7.7.101)	dnaG	19	26	0.00398823	-0.296024	DNA replication, synthesis of RNA primer [GO:0006269]	cytoplasm [GO:0005737]; primosome complex [GO:1990077]	cytoplasm [GO:0005737]; primosome complex [GO:1990077]; DNA binding [GO:0003677]; DNA primase activity [GO:0003896]; zinc ion binding [GO:0008270]; DNA replication, synthesis of RNA primer [GO:0006269]	DNA binding [GO:0003677]; DNA primase activity [GO:0003896]; zinc ion binding [GO:0008270]
DNAJ_ECOLI	P08622	Chaperone protein DnaJ (HSP40) (Heat shock protein J)	dnaJ	62	51	0.236406	-0.292741	chaperone cofactor-dependent protein refolding [GO:0051085]; DNA replication [GO:0006260]; protein-containing complex assembly [GO:0065003]; protein folding [GO:0006457]; protein refolding [GO:0042026]; response to heat [GO:0009408]; viral process [GO:0016032]	cytoplasm [GO:0005737]; cytosol [GO:0005829]; membrane [GO:0016020]; protein-containing complex [GO:0032991]	cytoplasm [GO:0005737]; cytosol [GO:0005829]; membrane [GO:0016020]; protein-containing complex [GO:0032991]; ATP binding [GO:0005524]; chaperone binding [GO:0051087]; heat shock protein binding [GO:0031072]; protein disulfide isomerase activity [GO:0003756]; protein-disulfide reductase activity [GO:0015035]; sigma factor antagonist activity [GO:0016989]; unfolded protein binding [GO:0051082]; zi…	ATP binding [GO:0005524]; chaperone binding [GO:0051087]; heat shock protein binding [GO:0031072]; protein disulfide isomerase activity [GO:0003756]; protein-disulfide reductase activity [GO:0015035]; sigma factor antagonist activity [GO:0016989]; unfolded protein binding [GO:0051082]; zinc ion binding [GO:0008270]	SUBCELLULAR LOCATION: Cytoplasm.
DNAK_ECOLI	P0A6Y8	Chaperone protein DnaK (HSP70) (Heat shock 70 kDa protein) (Heat shock protein 70)	dnaK	352	306	0.315032	-0.405191	cellular response to unfolded protein [GO:0034620]; chaperone cofactor-dependent protein refolding [GO:0051085]; DNA replication [GO:0006260]; protein-containing complex assembly [GO:0065003]; protein-containing complex disassembly [GO:0032984]; response to heat [GO:0009408]	cytoplasm [GO:0005737]; cytosol [GO:0005829]; inclusion body [GO:0016234]; membrane [GO:0016020]; plasma membrane [GO:0005886]; protein-containing complex [GO:0032991]	cytoplasm [GO:0005737]; cytosol [GO:0005829]; inclusion body [GO:0016234]; membrane [GO:0016020]; plasma membrane [GO:0005886]; protein-containing complex [GO:0032991]; ADP binding [GO:0043531]; ATP binding [GO:0005524]; chaperone binding [GO:0051087]; protein folding chaperone [GO:0044183]; sigma factor antagonist activity [GO:0016989]; unfolded protein binding [GO:0051082]; zinc ion binding [GO…	ADP binding [GO:0043531]; ATP binding [GO:0005524]; chaperone binding [GO:0051087]; protein folding chaperone [GO:0044183]; sigma factor antagonist activity [GO:0016989]; unfolded protein binding [GO:0051082]; zinc ion binding [GO:0008270]	SUBCELLULAR LOCATION: Cytoplasm {ECO:0000269|PubMed:16079137}. Cell inner membrane {ECO:0000269|PubMed:16079137}; Peripheral membrane protein {ECO:0000269|PubMed:16079137}.
DNAT_ECOLI	P0A8J2	Primosomal protein 1 (Primosomal protein I)	dnaT	13	11	0.0290973	0.154828	DNA-dependent DNA replication [GO:0006261]; DNA replication, synthesis of RNA primer [GO:0006269]; pre-replicative complex assembly involved in nuclear cell cycle DNA replication [GO:0006267]	primosome complex [GO:1990077]	primosome complex [GO:1990077]; identical protein binding [GO:0042802]; DNA replication, synthesis of RNA primer [GO:0006269]; DNA-dependent DNA replication [GO:0006261]; pre-replicative complex assembly involved in nuclear cell cycle DNA replication [GO:0006267]	identical protein binding [GO:0042802]
DNLJ_ECOLI	P15042	DNA ligase (EC 6.5.1.2) (Polydeoxyribonucleotide synthase [NAD(+)])	ligA	62	42	-0.0209988	-0.204581	base-excision repair, DNA ligation [GO:0006288]; DNA ligation [GO:0006266]; DNA replication [GO:0006260]	cytosol [GO:0005829]	cytosol [GO:0005829]; DNA binding [GO:0003677]; DNA ligase (NAD+) activity [GO:0003911]; metal ion binding [GO:0046872]; NAD+ binding [GO:0070403]; base-excision repair, DNA ligation [GO:0006288]; DNA ligation [GO:0006266]; DNA replication [GO:0006260]	DNA binding [GO:0003677]; DNA ligase (NAD+) activity [GO:0003911]; metal ion binding [GO:0046872]; NAD+ binding [GO:0070403]
DPIA_ECOLI	P0AEF4	Transcriptional regulatory protein DpiA (Destabilizer of plasmid inheritance)	dpiA	2	6	-0.0551188	0.56589	phosphorelay signal transduction system [GO:0000160]; regulation of transcription, DNA-templated [GO:0006355]	cytoplasm [GO:0005737]	cytoplasm [GO:0005737]; DNA binding [GO:0003677]; DNA-binding transcription factor activity [GO:0003700]; phosphorelay response regulator activity [GO:0000156]; phosphorelay signal transduction system [GO:0000160]; regulation of transcription, DNA-templated [GO:0006355]	DNA binding [GO:0003677]; DNA-binding transcription factor activity [GO:0003700]; phosphorelay response regulator activity [GO:0000156]	SUBCELLULAR LOCATION: Cytoplasm {ECO:0000305}.
DPO1_ECOLI	P00582	DNA polymerase I (POL I) (EC 2.7.7.7)	polA	110	121	-0.0646776	-0.438916	base-excision repair [GO:0006284]; DNA-dependent DNA replication [GO:0006261]; DNA repair [GO:0006281]; DNA replication [GO:0006260]; double-strand break repair [GO:0006302]	cytoplasm [GO:0005737]; cytosol [GO:0005829]	cytoplasm [GO:0005737]; cytosol [GO:0005829]; 3'-5' exonuclease activity [GO:0008408]; 5'-3' exonuclease activity [GO:0008409]; DNA binding [GO:0003677]; DNA-directed DNA polymerase activity [GO:0003887]; base-excision repair [GO:0006284]; DNA repair [GO:0006281]; DNA replication [GO:0006260]; DNA-dependent DNA replication [GO:0006261]; double-strand break repair [GO:0006302]	3'-5' exonuclease activity [GO:0008408]; 5'-3' exonuclease activity [GO:0008409]; DNA binding [GO:0003677]; DNA-directed DNA polymerase activity [GO:0003887]
DPO3A_ECOLI	P10443	DNA polymerase III subunit alpha (EC 2.7.7.7)	dnaE	31	31	-0.0105456	0.411663	DNA replication [GO:0006260]; nucleic acid phosphodiester bond hydrolysis [GO:0090305]	cytoplasm [GO:0005737]; cytosol [GO:0005829]; DNA polymerase III, core complex [GO:0044776]	cytoplasm [GO:0005737]; cytosol [GO:0005829]; DNA polymerase III, core complex [GO:0044776]; DNA binding [GO:0003677]; DNA-directed DNA polymerase activity [GO:0003887]; DNA replication [GO:0006260]; nucleic acid phosphodiester bond hydrolysis [GO:0090305]	DNA binding [GO:0003677]; DNA-directed DNA polymerase activity [GO:0003887]	SUBCELLULAR LOCATION: Cytoplasm.
DPO3B_ECOLI	P0A988	Beta sliding clamp (Beta clamp) (Sliding clamp) (Beta-clamp processivity factor) (DNA polymerase III beta sliding clamp subunit)	dnaN	29	25	-0.000814807	0.0990425	bacterial-type DNA replication [GO:0044787]; cellular response to DNA damage stimulus [GO:0006974]; DNA strand elongation involved in DNA replication [GO:0006271]; error-prone translesion synthesis [GO:0042276]	cytosol [GO:0005829]; DNA polymerase III complex [GO:0009360]	cytosol [GO:0005829]; DNA polymerase III complex [GO:0009360]; 3'-5' exonuclease activity [GO:0008408]; DNA binding [GO:0003677]; DNA-directed DNA polymerase activity [GO:0003887]; identical protein binding [GO:0042802]; bacterial-type DNA replication [GO:0044787]; cellular response to DNA damage stimulus [GO:0006974]; DNA strand elongation involved in DNA replication [GO:0006271]; error-prone tr…	3'-5' exonuclease activity [GO:0008408]; DNA binding [GO:0003677]; DNA-directed DNA polymerase activity [GO:0003887]; identical protein binding [GO:0042802]	SUBCELLULAR LOCATION: Cytoplasm {ECO:0000269|PubMed:23994470}. Note=Localizes to midcell position when chromosomes are condensed during DNA replication (PubMed:23994470). {ECO:0000269|PubMed:23994470}.
DPO3E_ECOLI	P03007	DNA polymerase III subunit epsilon (EC 2.7.7.7)	dnaQ	3	2	-0.109037	-0.135973	DNA replication proofreading [GO:0045004]	cytosol [GO:0005829]; DNA polymerase III, core complex [GO:0044776]	cytosol [GO:0005829]; DNA polymerase III, core complex [GO:0044776]; 3'-5' exonuclease activity [GO:0008408]; DNA binding [GO:0003677]; DNA-directed DNA polymerase activity [GO:0003887]; exonuclease activity [GO:0004527]; metal ion binding [GO:0046872]; DNA replication proofreading [GO:0045004]	3'-5' exonuclease activity [GO:0008408]; DNA binding [GO:0003677]; DNA-directed DNA polymerase activity [GO:0003887]; exonuclease activity [GO:0004527]; metal ion binding [GO:0046872]
DPO3X_ECOLI	P06710	DNA polymerase III subunit tau (EC 2.7.7.7) (DNA polymerase III subunit gamma)	dnaX	32	46	0.0188331	0.508649	DNA-dependent DNA replication [GO:0006261]; DNA replication [GO:0006260]	DNA polymerase III, clamp loader complex [GO:0043846]; DNA polymerase III complex [GO:0009360]	DNA polymerase III complex [GO:0009360]; DNA polymerase III, clamp loader complex [GO:0043846]; ATP binding [GO:0005524]; DNA binding [GO:0003677]; DNA polymerase processivity factor activity [GO:0030337]; DNA-directed DNA polymerase activity [GO:0003887]; identical protein binding [GO:0042802]; nucleoside-triphosphatase activity [GO:0017111]; DNA replication [GO:0006260]; DNA-dependent DNA repli…	ATP binding [GO:0005524]; DNA binding [GO:0003677]; DNA-directed DNA polymerase activity [GO:0003887]; DNA polymerase processivity factor activity [GO:0030337]; identical protein binding [GO:0042802]; nucleoside-triphosphatase activity [GO:0017111]
DPPA_ECOLI	P23847	Dipeptide-binding protein (DBP) (Periplasmic dipeptide transport protein)	dppA	205	178	-0.0639383	-1.0973	chaperone-mediated protein folding [GO:0061077]; chemotaxis [GO:0006935]; dipeptide transport [GO:0042938]; peptide transport [GO:0015833]; protein transport [GO:0015031]	ATP-binding cassette (ABC) transporter complex [GO:0043190]; outer membrane-bounded periplasmic space [GO:0030288]	ATP-binding cassette (ABC) transporter complex [GO:0043190]; outer membrane-bounded periplasmic space [GO:0030288]; dipeptide transmembrane transporter activity [GO:0071916]; heme binding [GO:0020037]; peptide binding [GO:0042277]; peptide transmembrane transporter activity [GO:1904680]; chaperone-mediated protein folding [GO:0061077]; chemotaxis [GO:0006935]; dipeptide transport [GO:0042938]; pe…	dipeptide transmembrane transporter activity [GO:0071916]; heme binding [GO:0020037]; peptide binding [GO:0042277]; peptide transmembrane transporter activity [GO:1904680]	SUBCELLULAR LOCATION: Periplasm {ECO:0000269|PubMed:1702779}.
DPPB_ECOLI	P0AEF8	Dipeptide transport system permease protein DppB	dppB	5	5	-0.0399466	-0.905838	protein transport [GO:0015031]	integral component of membrane [GO:0016021]; plasma membrane [GO:0005886]	integral component of membrane [GO:0016021]; plasma membrane [GO:0005886]; dipeptide transmembrane transporter activity [GO:0071916]; protein transport [GO:0015031]	dipeptide transmembrane transporter activity [GO:0071916]	SUBCELLULAR LOCATION: Cell inner membrane {ECO:0000269|PubMed:15919996}; Multi-pass membrane protein {ECO:0000255}.
DPPC_ECOLI	P0AEG1	Dipeptide transport system permease protein DppC	dppC	7	13	-0.131963	-0.930725	protein transport [GO:0015031]	integral component of membrane [GO:0016021]; plasma membrane [GO:0005886]	integral component of membrane [GO:0016021]; plasma membrane [GO:0005886]; dipeptide transmembrane transporter activity [GO:0071916]; protein transport [GO:0015031]	dipeptide transmembrane transporter activity [GO:0071916]	SUBCELLULAR LOCATION: Cell inner membrane {ECO:0000269|PubMed:15919996}; Multi-pass membrane protein.
DPPD_ECOLI	P0AAG0	Dipeptide transport ATP-binding protein DppD (EC 7.4.2.9)	dppD	33	34	-0.0956961	-0.921163	peptide transport [GO:0015833]; protein transport [GO:0015031]	plasma membrane [GO:0005886]	plasma membrane [GO:0005886]; ATP binding [GO:0005524]; ATPase-coupled transmembrane transporter activity [GO:0042626]; heme transmembrane transporter activity [GO:0015232]; peptide transport [GO:0015833]; protein transport [GO:0015031]	ATPase-coupled transmembrane transporter activity [GO:0042626]; ATP binding [GO:0005524]; heme transmembrane transporter activity [GO:0015232]	SUBCELLULAR LOCATION: Cell inner membrane {ECO:0000305}; Peripheral membrane protein {ECO:0000305}.
DPPF_ECOLI	P37313	Dipeptide transport ATP-binding protein DppF (EC 7.4.2.9)	dppF	43	56	-0.0649698	-0.865383	peptide transport [GO:0015833]; protein transport [GO:0015031]; response to radiation [GO:0009314]	plasma membrane [GO:0005886]	plasma membrane [GO:0005886]; ATP binding [GO:0005524]; ATPase-coupled transmembrane transporter activity [GO:0042626]; heme transmembrane transporter activity [GO:0015232]; peptide transport [GO:0015833]; protein transport [GO:0015031]; response to radiation [GO:0009314]	ATPase-coupled transmembrane transporter activity [GO:0042626]; ATP binding [GO:0005524]; heme transmembrane transporter activity [GO:0015232]	SUBCELLULAR LOCATION: Cell inner membrane {ECO:0000305}; Peripheral membrane protein {ECO:0000305}.
DPS_ECOLI	P0ABT2	DNA protection during starvation protein (EC 1.16.-.-)	dps	80	62	-0.0502399	-0.473665	cellular iron ion homeostasis [GO:0006879]; chromosome condensation [GO:0030261]; response to starvation [GO:0042594]	cytoplasm [GO:0005737]; membrane [GO:0016020]; nucleoid [GO:0009295]	cytoplasm [GO:0005737]; membrane [GO:0016020]; nucleoid [GO:0009295]; DNA binding [GO:0003677]; ferric iron binding [GO:0008199]; identical protein binding [GO:0042802]; oxidoreductase activity, acting on metal ions [GO:0016722]; cellular iron ion homeostasis [GO:0006879]; chromosome condensation [GO:0030261]; response to starvation [GO:0042594]	DNA binding [GO:0003677]; ferric iron binding [GO:0008199]; identical protein binding [GO:0042802]; oxidoreductase activity, acting on metal ions [GO:0016722]	SUBCELLULAR LOCATION: Cytoplasm, nucleoid.
DSBA_ECOLI	P0AEG4	Thiol:disulfide interchange protein DsbA	dsbA	86	78	-0.0704136	0.0675967	cellular response to antibiotic [GO:0071236]	outer membrane-bounded periplasmic space [GO:0030288]	outer membrane-bounded periplasmic space [GO:0030288]; protein disulfide isomerase activity [GO:0003756]; protein-disulfide reductase activity [GO:0015035]; cellular response to antibiotic [GO:0071236]	protein disulfide isomerase activity [GO:0003756]; protein-disulfide reductase activity [GO:0015035]	SUBCELLULAR LOCATION: Periplasm.
DSBB_ECOLI	P0A6M2	Disulfide bond formation protein B (Disulfide oxidoreductase)	dsbB	1	11	0.0377431	0.198545	protein folding [GO:0006457]; response to heat [GO:0009408]	integral component of plasma membrane [GO:0005887]	integral component of plasma membrane [GO:0005887]; electron transfer activity [GO:0009055]; oxidoreductase activity, acting on a sulfur group of donors, quinone or similar compound as acceptor [GO:0016672]; protein-disulfide reductase activity [GO:0015035]; ubiquinone binding [GO:0048039]; protein folding [GO:0006457]; response to heat [GO:0009408]	electron transfer activity [GO:0009055]; oxidoreductase activity, acting on a sulfur group of donors, quinone or similar compound as acceptor [GO:0016672]; protein-disulfide reductase activity [GO:0015035]; ubiquinone binding [GO:0048039]	SUBCELLULAR LOCATION: Cell inner membrane {ECO:0000269|PubMed:7957076, ECO:0000269|PubMed:8430071}; Multi-pass membrane protein {ECO:0000269|PubMed:7957076, ECO:0000269|PubMed:8430071}.
DSBC_ECOLI	P0AEG6	Thiol:disulfide interchange protein DsbC	dsbC	37	27	-0.0100315	0.452559	chaperone-mediated protein folding [GO:0061077]; response to copper ion [GO:0046688]	outer membrane-bounded periplasmic space [GO:0030288]; periplasmic space [GO:0042597]	outer membrane-bounded periplasmic space [GO:0030288]; periplasmic space [GO:0042597]; protein disulfide isomerase activity [GO:0003756]; protein-disulfide reductase activity [GO:0015035]; chaperone-mediated protein folding [GO:0061077]; response to copper ion [GO:0046688]	protein disulfide isomerase activity [GO:0003756]; protein-disulfide reductase activity [GO:0015035]	SUBCELLULAR LOCATION: Periplasm {ECO:0000269|PubMed:8168498}.
DSBD_ECOLI	P36655	Thiol:disulfide interchange protein DsbD (EC 1.8.1.8) (C-type cytochrome biogenesis protein CycZ) (Inner membrane copper tolerance protein) (Protein-disulfide reductase) (Disulfide reductase)	dsbD	5	11	-0.0101257	0.364794	cell redox homeostasis [GO:0045454]; cytochrome complex assembly [GO:0017004]; response to copper ion [GO:0046688]	cytoplasmic side of plasma membrane [GO:0009898]; integral component of plasma membrane [GO:0005887]	cytoplasmic side of plasma membrane [GO:0009898]; integral component of plasma membrane [GO:0005887]; electron transfer activity [GO:0009055]; protein-disulfide reductase (NAD(P)) activity [GO:0047134]; protein-disulfide reductase activity [GO:0015035]; cell redox homeostasis [GO:0045454]; cytochrome complex assembly [GO:0017004]; response to copper ion [GO:0046688]	electron transfer activity [GO:0009055]; protein-disulfide reductase (NAD(P)) activity [GO:0047134]; protein-disulfide reductase activity [GO:0015035]	SUBCELLULAR LOCATION: Cell inner membrane; Multi-pass membrane protein.
DSBE_ECOLI	P0AA86	Thiol:disulfide interchange protein DsbE (Cytochrome c biogenesis protein CcmG)	dsbE	2	4	-0.0322845	0.500815	cytochrome complex assembly [GO:0017004]	integral component of membrane [GO:0016021]; intrinsic component of periplasmic side of plasma membrane [GO:0031237]; outer membrane-bounded periplasmic space [GO:0030288]	integral component of membrane [GO:0016021]; intrinsic component of periplasmic side of plasma membrane [GO:0031237]; outer membrane-bounded periplasmic space [GO:0030288]; disulfide oxidoreductase activity [GO:0015036]; cytochrome complex assembly [GO:0017004]	disulfide oxidoreductase activity [GO:0015036]	SUBCELLULAR LOCATION: Cell inner membrane; Single-pass membrane protein; Periplasmic side.
DSBG_ECOLI	P77202	Thiol:disulfide interchange protein DsbG	dsbG	31	34	-0.036818	0.00546561	chaperone-mediated protein folding [GO:0061077]	outer membrane-bounded periplasmic space [GO:0030288]	outer membrane-bounded periplasmic space [GO:0030288]; protein disulfide isomerase activity [GO:0003756]; chaperone-mediated protein folding [GO:0061077]	protein disulfide isomerase activity [GO:0003756]	SUBCELLULAR LOCATION: Periplasm.
DSDC_ECOLI	P46068	HTH-type transcriptional regulator DsdC (D-serine deaminase activator)	dsdC	1	3	0.0804157	-0.827363	transcription, DNA-templated [GO:0006351]		DNA-binding transcription factor activity [GO:0003700]; sequence-specific DNA binding [GO:0043565]; transcription, DNA-templated [GO:0006351]	DNA-binding transcription factor activity [GO:0003700]; sequence-specific DNA binding [GO:0043565]
DSDX_ECOLI	P08555	D-serine transporter DsdX	dsdX	5	4	-0.188053	-1.02143	cellular response to DNA damage stimulus [GO:0006974]; D-serine transport [GO:0042942]; gluconate transmembrane transport [GO:0035429]	integral component of plasma membrane [GO:0005887]; plasma membrane [GO:0005886]	integral component of plasma membrane [GO:0005887]; plasma membrane [GO:0005886]; D-serine transmembrane transporter activity [GO:0042945]; gluconate transmembrane transporter activity [GO:0015128]; cellular response to DNA damage stimulus [GO:0006974]; D-serine transport [GO:0042942]; gluconate transmembrane transport [GO:0035429]	D-serine transmembrane transporter activity [GO:0042945]; gluconate transmembrane transporter activity [GO:0015128]	SUBCELLULAR LOCATION: Cell inner membrane {ECO:0000269|PubMed:15919996}; Multi-pass membrane protein {ECO:0000305}.
DTD_ECOLI	P0A6M4	D-aminoacyl-tRNA deacylase (DTD) (EC 3.1.1.96) (D-tyrosyl RNA deacylase) (D-tyrosyl-tRNA(Tyr) deacylase) (Gly-tRNA(Ala) deacylase) (Gly-tRNA(Gly) deacylase)	dtd	10	5	-0.0378886	-0.11453	D-amino acid catabolic process [GO:0019478]; response to heat [GO:0009408]; tRNA metabolic process [GO:0006399]	cytoplasm [GO:0005737]	cytoplasm [GO:0005737]; aminoacyl-tRNA editing activity [GO:0002161]; D-aminoacyl-tRNA deacylase activity [GO:0051499]; D-tyrosyl-tRNA(Tyr) deacylase activity [GO:0051500]; Gly-tRNA(Ala) hydrolase activity [GO:0106026]; Ser(Gly)-tRNA(Ala) hydrolase activity [GO:0043908]; tRNA binding [GO:0000049]; D-amino acid catabolic process [GO:0019478]; response to heat [GO:0009408]; tRNA metabolic process […	aminoacyl-tRNA editing activity [GO:0002161]; D-aminoacyl-tRNA deacylase activity [GO:0051499]; D-tyrosyl-tRNA(Tyr) deacylase activity [GO:0051500]; Gly-tRNA(Ala) hydrolase activity [GO:0106026]; Ser(Gly)-tRNA(Ala) hydrolase activity [GO:0043908]; tRNA binding [GO:0000049]	SUBCELLULAR LOCATION: Cytoplasm {ECO:0000255|HAMAP-Rule:MF_00518, ECO:0000305|PubMed:4292198}.
DTPA_ECOLI	P77304	Dipeptide and tripeptide permease A	dtpA	5	7	0.0304619	-0.239777	dipeptide transmembrane transport [GO:0035442]; protein transport [GO:0015031]; proton transmembrane transport [GO:1902600]; tripeptide transmembrane transport [GO:0035443]	integral component of plasma membrane [GO:0005887]; plasma membrane [GO:0005886]	integral component of plasma membrane [GO:0005887]; plasma membrane [GO:0005886]; dipeptide transmembrane transporter activity [GO:0071916]; peptide:proton symporter activity [GO:0015333]; proton transmembrane transporter activity [GO:0015078]; tripeptide transmembrane transporter activity [GO:0042937]; dipeptide transmembrane transport [GO:0035442]; protein transport [GO:0015031]; proton transme…	dipeptide transmembrane transporter activity [GO:0071916]; peptide:proton symporter activity [GO:0015333]; proton transmembrane transporter activity [GO:0015078]; tripeptide transmembrane transporter activity [GO:0042937]	SUBCELLULAR LOCATION: Cell inner membrane {ECO:0000305}; Multi-pass membrane protein {ECO:0000305}.
DUSA_ECOLI	P32695	tRNA-dihydrouridine(20/20a) synthase (EC 1.3.1.-) (EC 1.3.1.91) (U20-specific dihydrouridine synthase) (U20-specific Dus) (tRNA-dihydrouridine synthase A)	dusA	44	47	-0.0128989	0.918228		cytosol [GO:0005829]	cytosol [GO:0005829]; flavin adenine dinucleotide binding [GO:0050660]; FMN binding [GO:0010181]; tRNA binding [GO:0000049]; tRNA dihydrouridine synthase activity [GO:0017150]; tRNA-dihydrouridine20 synthase activity [GO:0102264]	flavin adenine dinucleotide binding [GO:0050660]; FMN binding [GO:0010181]; tRNA binding [GO:0000049]; tRNA-dihydrouridine20 synthase activity [GO:0102264]; tRNA dihydrouridine synthase activity [GO:0017150]
DUSB_ECOLI	P0ABT5	tRNA-dihydrouridine synthase B (EC 1.3.1.-)	dusB	5	7	0.0528844	-0.323968	response to radiation [GO:0009314]		flavin adenine dinucleotide binding [GO:0050660]; FMN binding [GO:0010181]; tRNA binding [GO:0000049]; tRNA dihydrouridine synthase activity [GO:0017150]; response to radiation [GO:0009314]	flavin adenine dinucleotide binding [GO:0050660]; FMN binding [GO:0010181]; tRNA binding [GO:0000049]; tRNA dihydrouridine synthase activity [GO:0017150]
DUSC_ECOLI	P33371	tRNA-dihydrouridine(16) synthase (EC 1.3.1.-) (U16-specific dihydrouridine synthase) (U16-specific Dus) (tRNA-dihydrouridine synthase C)	dusC	11	10	0.0559972	0.939274	tRNA dihydrouridine synthesis [GO:0002943]		flavin adenine dinucleotide binding [GO:0050660]; FMN binding [GO:0010181]; tRNA binding [GO:0000049]; tRNA dihydrouridine synthase activity [GO:0017150]; tRNA dihydrouridine synthesis [GO:0002943]	flavin adenine dinucleotide binding [GO:0050660]; FMN binding [GO:0010181]; tRNA binding [GO:0000049]; tRNA dihydrouridine synthase activity [GO:0017150]
DUT_ECOLI	P06968	Deoxyuridine 5'-triphosphate nucleotidohydrolase (dUTPase) (EC 3.6.1.23) (dUTP pyrophosphatase)	dut	26	30	-0.013667	0.574316	dUMP biosynthetic process [GO:0006226]; dUTP catabolic process [GO:0046081]	cytosol [GO:0005829]; protein-containing complex [GO:0032991]	cytosol [GO:0005829]; protein-containing complex [GO:0032991]; dUTP diphosphatase activity [GO:0004170]; magnesium ion binding [GO:0000287]; dUMP biosynthetic process [GO:0006226]; dUTP catabolic process [GO:0046081]	dUTP diphosphatase activity [GO:0004170]; magnesium ion binding [GO:0000287]	SUBCELLULAR LOCATION: Cytoplasm {ECO:0000305|PubMed:1311056, ECO:0000305|PubMed:9261872}.
DXR_ECOLI	P45568	1-deoxy-D-xylulose 5-phosphate reductoisomerase (DXP reductoisomerase) (EC 1.1.1.267) (1-deoxyxylulose-5-phosphate reductoisomerase) (2-C-methyl-D-erythritol 4-phosphate synthase)	dxr	13	27	0.0489204	0.312119	isopentenyl diphosphate biosynthetic process, methylerythritol 4-phosphate pathway [GO:0019288]; isopentenyl diphosphate biosynthetic process, methylerythritol 4-phosphate pathway involved in terpenoid biosynthetic process [GO:0051484]		1-deoxy-D-xylulose-5-phosphate reductoisomerase activity [GO:0030604]; identical protein binding [GO:0042802]; manganese ion binding [GO:0030145]; NADPH binding [GO:0070402]; isopentenyl diphosphate biosynthetic process, methylerythritol 4-phosphate pathway [GO:0019288]; isopentenyl diphosphate biosynthetic process, methylerythritol 4-phosphate pathway involved in terpenoid biosynthetic process […	1-deoxy-D-xylulose-5-phosphate reductoisomerase activity [GO:0030604]; identical protein binding [GO:0042802]; manganese ion binding [GO:0030145]; NADPH binding [GO:0070402]
DXS_ECOLI	P77488	1-deoxy-D-xylulose-5-phosphate synthase (EC 2.2.1.7) (1-deoxyxylulose-5-phosphate synthase) (DXP synthase) (DXPS)	dxs	83	55	-0.0255712	0.155066	1-deoxy-D-xylulose 5-phosphate biosynthetic process [GO:0052865]; isopentenyl diphosphate biosynthetic process, methylerythritol 4-phosphate pathway [GO:0019288]; isoprenoid biosynthetic process [GO:0008299]; pyridoxine biosynthetic process [GO:0008615]; terpenoid biosynthetic process [GO:0016114]; thiamine biosynthetic process [GO:0009228]; ubiquinone biosynthetic process [GO:0006744]	cytosol [GO:0005829]	cytosol [GO:0005829]; 1-deoxy-D-xylulose-5-phosphate synthase activity [GO:0008661]; magnesium ion binding [GO:0000287]; thiamine pyrophosphate binding [GO:0030976]; transketolase or transaldolase activity [GO:0016744]; 1-deoxy-D-xylulose 5-phosphate biosynthetic process [GO:0052865]; isopentenyl diphosphate biosynthetic process, methylerythritol 4-phosphate pathway [GO:0019288]; isoprenoid biosy…	1-deoxy-D-xylulose-5-phosphate synthase activity [GO:0008661]; magnesium ion binding [GO:0000287]; thiamine pyrophosphate binding [GO:0030976]; transketolase or transaldolase activity [GO:0016744]
DYR_ECOLI	P0ABQ4	Dihydrofolate reductase (EC 1.5.1.3)	folA	12	14	-0.040993	-0.34858	dihydrofolate metabolic process [GO:0046452]; folic acid metabolic process [GO:0046655]; glycine biosynthetic process [GO:0006545]; one-carbon metabolic process [GO:0006730]; response to antibiotic [GO:0046677]; response to drug [GO:0042493]; response to methotrexate [GO:0031427]; tetrahydrofolate biosynthetic process [GO:0046654]	cytosol [GO:0005829]	cytosol [GO:0005829]; dihydrofolate reductase activity [GO:0004146]; dihydrofolic acid binding [GO:0051871]; folic acid binding [GO:0005542]; methotrexate binding [GO:0051870]; NADP binding [GO:0050661]; NADP+ binding [GO:0070401]; NADPH binding [GO:0070402]; dihydrofolate metabolic process [GO:0046452]; folic acid metabolic process [GO:0046655]; glycine biosynthetic process [GO:0006545]; one-car…	dihydrofolate reductase activity [GO:0004146]; dihydrofolic acid binding [GO:0051871]; folic acid binding [GO:0005542]; methotrexate binding [GO:0051870]; NADP+ binding [GO:0070401]; NADP binding [GO:0050661]; NADPH binding [GO:0070402]
E4PD_ECOLI	P0A9B6	D-erythrose-4-phosphate dehydrogenase (E4PDH) (EC 1.2.1.72)	epd	23	20	-0.101371	-0.158245	glucose metabolic process [GO:0006006]; pyridoxal phosphate biosynthetic process [GO:0042823]; pyridoxine biosynthetic process [GO:0008615]	cytosol [GO:0005829]	cytosol [GO:0005829]; erythrose-4-phosphate dehydrogenase activity [GO:0048001]; glyceraldehyde-3-phosphate dehydrogenase (NAD+) (phosphorylating) activity [GO:0004365]; NAD binding [GO:0051287]; glucose metabolic process [GO:0006006]; pyridoxal phosphate biosynthetic process [GO:0042823]; pyridoxine biosynthetic process [GO:0008615]	erythrose-4-phosphate dehydrogenase activity [GO:0048001]; glyceraldehyde-3-phosphate dehydrogenase (NAD+) (phosphorylating) activity [GO:0004365]; NAD binding [GO:0051287]	SUBCELLULAR LOCATION: Cytoplasm.
EBGR_ECOLI	P06846	HTH-type transcriptional regulator EbgR (Ebg operon repressor)	ebgR	5	5	0.0033611	-0.265337	negative regulation of transcription, DNA-templated [GO:0045892]; regulation of transcription, DNA-templated [GO:0006355]		DNA-binding transcription factor activity [GO:0003700]; transcription cis-regulatory region binding [GO:0000976]; negative regulation of transcription, DNA-templated [GO:0045892]; regulation of transcription, DNA-templated [GO:0006355]	DNA-binding transcription factor activity [GO:0003700]; transcription cis-regulatory region binding [GO:0000976]
ECNB_ECOLI	P0ADB7	Entericidin B	ecnB	10	8	-0.145845	-0.739036	response to toxic substance [GO:0009636]	membrane [GO:0016020]; plasma membrane [GO:0005886]	membrane [GO:0016020]; plasma membrane [GO:0005886]; response to toxic substance [GO:0009636]		SUBCELLULAR LOCATION: Cell membrane; Lipid-anchor.
ECOT_ECOLI	P23827	Ecotin	eco	40	44	0.0453451	0.41292		outer membrane-bounded periplasmic space [GO:0030288]	outer membrane-bounded periplasmic space [GO:0030288]; serine-type endopeptidase inhibitor activity [GO:0004867]	serine-type endopeptidase inhibitor activity [GO:0004867]	SUBCELLULAR LOCATION: Periplasm.
EDD_ECOLI	P0ADF6	Phosphogluconate dehydratase (EC 4.2.1.12) (6-phosphogluconate dehydratase) (Entner-Doudoroff dehydrase)	edd	6	3	-0.0282019	0.337343	D-gluconate catabolic process [GO:0046177]; Entner-Doudoroff pathway through 6-phosphogluconate [GO:0009255]	cytosol [GO:0005829]	cytosol [GO:0005829]; 4 iron, 4 sulfur cluster binding [GO:0051539]; hydro-lyase activity [GO:0016836]; metal ion binding [GO:0046872]; phosphogluconate dehydratase activity [GO:0004456]; D-gluconate catabolic process [GO:0046177]; Entner-Doudoroff pathway through 6-phosphogluconate [GO:0009255]	4 iron, 4 sulfur cluster binding [GO:0051539]; hydro-lyase activity [GO:0016836]; metal ion binding [GO:0046872]; phosphogluconate dehydratase activity [GO:0004456]
EFEB_ECOLI	P31545	Deferrochelatase/peroxidase EfeB (EC 1.11.1.-)	efeB	8	12	0.00519966	-0.210521	cellular response to DNA damage stimulus [GO:0006974]; iron import into cell [GO:0033212]	cytosol [GO:0005829]; outer membrane-bounded periplasmic space [GO:0030288]; periplasmic space [GO:0042597]	cytosol [GO:0005829]; outer membrane-bounded periplasmic space [GO:0030288]; periplasmic space [GO:0042597]; heme binding [GO:0020037]; metal ion binding [GO:0046872]; peroxidase activity [GO:0004601]; cellular response to DNA damage stimulus [GO:0006974]; iron import into cell [GO:0033212]	heme binding [GO:0020037]; metal ion binding [GO:0046872]; peroxidase activity [GO:0004601]	SUBCELLULAR LOCATION: Periplasm {ECO:0000269|PubMed:16551627}.
EFEO_ECOLI	P0AB24	Iron uptake system component EfeO	efeO	103	107	0.0350357	-0.100251	response to antibiotic [GO:0046677]; response to oxidative stress [GO:0006979]; response to toxic substance [GO:0009636]; response to UV [GO:0009411]	outer membrane-bounded periplasmic space [GO:0030288]	outer membrane-bounded periplasmic space [GO:0030288]; response to antibiotic [GO:0046677]; response to oxidative stress [GO:0006979]; response to toxic substance [GO:0009636]; response to UV [GO:0009411]		SUBCELLULAR LOCATION: Periplasm {ECO:0000269|PubMed:16551627}.
EFG_ECOLI	P0A6M8	Elongation factor G (EF-G)	fusA	371	272	0.00428182	0.216135	ribosome disassembly [GO:0032790]	cytoplasm [GO:0005737]; cytosol [GO:0005829]	cytoplasm [GO:0005737]; cytosol [GO:0005829]; GTP binding [GO:0005525]; GTPase activity [GO:0003924]; translation elongation factor activity [GO:0003746]; ribosome disassembly [GO:0032790]	GTPase activity [GO:0003924]; GTP binding [GO:0005525]; translation elongation factor activity [GO:0003746]	SUBCELLULAR LOCATION: Cytoplasm.
EFPL_ECOLI	P0A6N8	Elongation factor P-like protein	yeiP	37	38	-0.0157023	-0.139408		cytoplasm [GO:0005737]; cytosol [GO:0005829]	cytoplasm [GO:0005737]; cytosol [GO:0005829]; translation elongation factor activity [GO:0003746]	translation elongation factor activity [GO:0003746]
EFP_ECOLI	P0A6N4	Elongation factor P (EF-P)	efp	41	36	0.0127073	-0.100348	negative regulation of translational frameshifting [GO:2001125]; rescue of stalled ribosome [GO:0072344]; translational elongation [GO:0006414]	cytoplasm [GO:0005737]; cytosol [GO:0005829]	cytoplasm [GO:0005737]; cytosol [GO:0005829]; ribosome binding [GO:0043022]; translation elongation factor activity [GO:0003746]; negative regulation of translational frameshifting [GO:2001125]; rescue of stalled ribosome [GO:0072344]; translational elongation [GO:0006414]	ribosome binding [GO:0043022]; translation elongation factor activity [GO:0003746]	SUBCELLULAR LOCATION: Cytoplasm.
EFTS_ECOLI	P0A6P1	Elongation factor Ts (EF-Ts) (Bacteriophage Q beta RNA-directed RNA polymerase subunit IV)	tsf	256	214	0.0119097	0.3066	translational elongation [GO:0006414]	cytoplasm [GO:0005737]; cytosol [GO:0005829]; membrane [GO:0016020]	cytoplasm [GO:0005737]; cytosol [GO:0005829]; membrane [GO:0016020]; guanyl-nucleotide exchange factor activity [GO:0005085]; translation elongation factor activity [GO:0003746]; zinc ion binding [GO:0008270]; translational elongation [GO:0006414]	guanyl-nucleotide exchange factor activity [GO:0005085]; translation elongation factor activity [GO:0003746]; zinc ion binding [GO:0008270]	SUBCELLULAR LOCATION: Cytoplasm {ECO:0000255|HAMAP-Rule:MF_00050}.
EFTU2_ECOLI	P0CE48	Elongation factor Tu 2 (EF-Tu 2) (Bacteriophage Q beta RNA-directed RNA polymerase subunit III) (P-43)	tufB	346	299	0.016664	0.168295	response to antibiotic [GO:0046677]; translational elongation [GO:0006414]	cytosol [GO:0005829]; plasma membrane [GO:0005886]	cytosol [GO:0005829]; plasma membrane [GO:0005886]; GTP binding [GO:0005525]; GTPase activity [GO:0003924]; translation elongation factor activity [GO:0003746]; response to antibiotic [GO:0046677]; translational elongation [GO:0006414]	GTPase activity [GO:0003924]; GTP binding [GO:0005525]; translation elongation factor activity [GO:0003746]	SUBCELLULAR LOCATION: Cytoplasm. Cell inner membrane; Peripheral membrane protein. Note=Between 50-80% of the protein is associated with the cell inner membrane. Localization to the membrane has been suggested to follow nutrient stress.
ELAA_ECOLI	P0AEH3	Protein ElaA	elaA	7	10	-0.0325258	-0.369184			acyltransferase activity, transferring groups other than amino-acyl groups [GO:0016747]; N-acetyltransferase activity [GO:0008080]	acyltransferase activity, transferring groups other than amino-acyl groups [GO:0016747]; N-acetyltransferase activity [GO:0008080]
ELAB_ECOLI	P0AEH5	Protein ElaB	elaB	28	29	-0.126791	-0.470139	cellular response to DNA damage stimulus [GO:0006974]	cytosol [GO:0005829]; integral component of plasma membrane [GO:0005887]	cytosol [GO:0005829]; integral component of plasma membrane [GO:0005887]; ribosome binding [GO:0043022]; cellular response to DNA damage stimulus [GO:0006974]	ribosome binding [GO:0043022]	SUBCELLULAR LOCATION: Cell inner membrane {ECO:0000305}; Single-pass membrane protein {ECO:0000305}.
ELBB_ECOLI	P0ABU5	Glyoxalase ElbB (EC 4.2.1.-) (Sigma cross-reacting protein 27A) (SCRP-27A)	elbB	40	42	-0.0570281	-0.518254	isoprenoid biosynthetic process [GO:0008299]; positive regulation of isoprenoid metabolic process [GO:0045828]	cytosol [GO:0005829]	cytosol [GO:0005829]; lyase activity [GO:0016829]; isoprenoid biosynthetic process [GO:0008299]; positive regulation of isoprenoid metabolic process [GO:0045828]	lyase activity [GO:0016829]
ELYC_ECOLI	P0AB01	Envelope biogenesis factor ElyC (Elevated frequency of lysis)	elyC	3	6	-0.0265989	-0.116346	cell wall organization [GO:0071555]; Gram-negative-bacterium-type cell wall biogenesis [GO:0043164]; peptidoglycan metabolic process [GO:0000270]; protein folding [GO:0006457]	integral component of membrane [GO:0016021]; plasma membrane [GO:0005886]	integral component of membrane [GO:0016021]; plasma membrane [GO:0005886]; cell wall organization [GO:0071555]; Gram-negative-bacterium-type cell wall biogenesis [GO:0043164]; peptidoglycan metabolic process [GO:0000270]; protein folding [GO:0006457]		SUBCELLULAR LOCATION: Cell inner membrane {ECO:0000305}; Multi-pass membrane protein {ECO:0000305}.
EMRA_ECOLI	P27303	Multidrug export protein EmrA	emrA	49	42	0.0784077	0.576954	response to antibiotic [GO:0046677]; response to toxic substance [GO:0009636]; xenobiotic detoxification by transmembrane export across the plasma membrane [GO:1990961]	integral component of plasma membrane [GO:0005887]; intrinsic component of plasma membrane [GO:0031226]; outer membrane-bounded periplasmic space [GO:0030288]	integral component of plasma membrane [GO:0005887]; intrinsic component of plasma membrane [GO:0031226]; outer membrane-bounded periplasmic space [GO:0030288]; identical protein binding [GO:0042802]; xenobiotic transmembrane transporter activity [GO:0042910]; response to antibiotic [GO:0046677]; response to toxic substance [GO:0009636]; xenobiotic detoxification by transmembrane export across the…	identical protein binding [GO:0042802]; xenobiotic transmembrane transporter activity [GO:0042910]	SUBCELLULAR LOCATION: Cell inner membrane {ECO:0000269|PubMed:12482849, ECO:0000269|PubMed:1409590}; Single-pass membrane protein {ECO:0000269|PubMed:12482849, ECO:0000269|PubMed:1409590}; Periplasmic side {ECO:0000269|PubMed:12482849, ECO:0000269|PubMed:1409590}.
EMTA_ECOLI	P0C960	Endo-type membrane-bound lytic murein transglycosylase A (EC 4.2.2.n2) (Peptidoglycan lytic endotransglycosylase)	emtA	22	19	0.0161659	0.122633	cell wall macromolecule catabolic process [GO:0016998]; cell wall organization [GO:0071555]; peptidoglycan metabolic process [GO:0000270]	cell outer membrane [GO:0009279]	cell outer membrane [GO:0009279]; carbon-oxygen lyase activity, acting on polysaccharides [GO:0016837]; lytic endotransglycosylase activity [GO:0008932]; lytic transglycosylase activity [GO:0008933]; cell wall macromolecule catabolic process [GO:0016998]; cell wall organization [GO:0071555]; peptidoglycan metabolic process [GO:0000270]	carbon-oxygen lyase activity, acting on polysaccharides [GO:0016837]; lytic endotransglycosylase activity [GO:0008932]; lytic transglycosylase activity [GO:0008933]	SUBCELLULAR LOCATION: Cell outer membrane {ECO:0000305|PubMed:9642199}; Lipid-anchor {ECO:0000305|PubMed:9642199}.
END3_ECOLI	P0AB83	Endonuclease III (EC 4.2.99.18) (DNA-(apurinic or apyrimidinic site) lyase)	nth	15	12	0.0478691	0.0880833	base-excision repair, AP site formation [GO:0006285]; base-excision repair, AP site formation via deaminated base removal [GO:0097510]; cellular response to UV [GO:0034644]		4 iron, 4 sulfur cluster binding [GO:0051539]; class I DNA-(apurinic or apyrimidinic site) endonuclease activity [GO:0140078]; DNA binding [GO:0003677]; DNA N-glycosylase activity [GO:0019104]; DNA-(apurinic or apyrimidinic site) endonuclease activity [GO:0003906]; metal ion binding [GO:0046872]; oxidized pyrimidine nucleobase lesion DNA N-glycosylase activity [GO:0000703]; uracil DNA N-glycosyla…	4 iron, 4 sulfur cluster binding [GO:0051539]; class I DNA-(apurinic or apyrimidinic site) endonuclease activity [GO:0140078]; DNA-(apurinic or apyrimidinic site) endonuclease activity [GO:0003906]; DNA binding [GO:0003677]; DNA N-glycosylase activity [GO:0019104]; metal ion binding [GO:0046872]; oxidized pyrimidine nucleobase lesion DNA N-glycosylase activity [GO:0000703]; uracil DNA N-glycosyla…
END4_ECOLI	P0A6C1	Endonuclease 4 (EC 3.1.21.2) (Endodeoxyribonuclease IV) (Endonuclease IV)	nfo	19	21	-0.0074656	0.421702	base-excision repair [GO:0006284]		deoxyribonuclease IV (phage-T4-induced) activity [GO:0008833]; DNA binding [GO:0003677]; DNA-(apurinic or apyrimidinic site) endonuclease activity [GO:0003906]; endonuclease activity [GO:0004519]; phosphoric diester hydrolase activity [GO:0008081]; zinc ion binding [GO:0008270]; base-excision repair [GO:0006284]	deoxyribonuclease IV (phage-T4-induced) activity [GO:0008833]; DNA-(apurinic or apyrimidinic site) endonuclease activity [GO:0003906]; DNA binding [GO:0003677]; endonuclease activity [GO:0004519]; phosphoric diester hydrolase activity [GO:0008081]; zinc ion binding [GO:0008270]
END8_ECOLI	P50465	Endonuclease 8 (DNA glycosylase/AP lyase Nei) (EC 3.2.2.-) (EC 4.2.99.18) (DNA-(apurinic or apyrimidinic site) lyase Nei) (Endonuclease VIII)	nei	1	4	-0.0070904	-0.171809	base-excision repair [GO:0006284]		class I DNA-(apurinic or apyrimidinic site) endonuclease activity [GO:0140078]; damaged DNA binding [GO:0003684]; DNA-(apurinic or apyrimidinic site) endonuclease activity [GO:0003906]; oxidized pyrimidine nucleobase lesion DNA N-glycosylase activity [GO:0000703]; zinc ion binding [GO:0008270]; base-excision repair [GO:0006284]	class I DNA-(apurinic or apyrimidinic site) endonuclease activity [GO:0140078]; damaged DNA binding [GO:0003684]; DNA-(apurinic or apyrimidinic site) endonuclease activity [GO:0003906]; oxidized pyrimidine nucleobase lesion DNA N-glycosylase activity [GO:0000703]; zinc ion binding [GO:0008270]
ENGB_ECOLI	P0A6P7	Probable GTP-binding protein EngB	engB	49	49	0.00345932	-0.0136837	division septum assembly [GO:0000917]	cytosol [GO:0005829]	cytosol [GO:0005829]; GTP binding [GO:0005525]; metal ion binding [GO:0046872]; division septum assembly [GO:0000917]	GTP binding [GO:0005525]; metal ion binding [GO:0046872]
ENO_ECOLI	P0A6P9	Enolase (EC 4.2.1.11) (2-phospho-D-glycerate hydro-lyase) (2-phosphoglycerate dehydratase)	eno	280	216	-0.122243	0.204718	glycolytic process [GO:0006096]; regulation of vacuole fusion, non-autophagic [GO:0032889]	cell surface [GO:0009986]; cytoskeleton [GO:0005856]; cytosol [GO:0005829]; extracellular region [GO:0005576]; membrane [GO:0016020]; phosphopyruvate hydratase complex [GO:0000015]	cell surface [GO:0009986]; cytoskeleton [GO:0005856]; cytosol [GO:0005829]; extracellular region [GO:0005576]; membrane [GO:0016020]; phosphopyruvate hydratase complex [GO:0000015]; identical protein binding [GO:0042802]; magnesium ion binding [GO:0000287]; phosphopyruvate hydratase activity [GO:0004634]; glycolytic process [GO:0006096]; regulation of vacuole fusion, non-autophagic [GO:0032889]	identical protein binding [GO:0042802]; magnesium ion binding [GO:0000287]; phosphopyruvate hydratase activity [GO:0004634]	SUBCELLULAR LOCATION: Cytoplasm, cytoskeleton. Secreted. Cell surface. Note=Fractions of enolase are present in both the cytoplasm and on the cell surface. As part of the bacterial cytoskeleton in the cytoplasm, is organized as extended coiled structures that wind around the cell, from one cell pole to the other. When covalently bound to the substrate at Lys-342, the inactive enolase is secreted,…
ENTA_ECOLI	P15047	2,3-dihydro-2,3-dihydroxybenzoate dehydrogenase (DiDHB-DH) (EC 1.3.1.28) (Trans-2,3-dihydro-2,3-dihydroxybenzoate dehydrogenase)	entA	25	21	-0.128091	-0.0483982	enterobactin biosynthetic process [GO:0009239]	cytosol [GO:0005829]; protein-containing complex [GO:0032991]	cytosol [GO:0005829]; protein-containing complex [GO:0032991]; 2,3-dihydro-2,3-dihydroxybenzoate dehydrogenase activity [GO:0008667]; identical protein binding [GO:0042802]; enterobactin biosynthetic process [GO:0009239]	2,3-dihydro-2,3-dihydroxybenzoate dehydrogenase activity [GO:0008667]; identical protein binding [GO:0042802]
ENTB_ECOLI	P0ADI4	Enterobactin synthase component B (EC 6.3.2.14) (Enterobactin biosynthesis bifunctional protein EntB) (Enterochelin synthase B) [Includes: Isochorismatase (EC 3.3.2.1) (2,3-dihydro-2,3-dihydroxybenzoate synthase) (Isochorismate lyase); Aryl carrier protein (ArCP)]	entB	44	36	-0.181703	-0.155341	enterobactin biosynthetic process [GO:0009239]	cytosol [GO:0005829]; plasma membrane [GO:0005886]	cytosol [GO:0005829]; plasma membrane [GO:0005886]; 2,3-dihydroxybenzoate-serine ligase activity [GO:0047527]; identical protein binding [GO:0042802]; isochorismatase activity [GO:0008908]; magnesium ion binding [GO:0000287]; phosphopantetheine binding [GO:0031177]; transferase activity, transferring alkyl or aryl (other than methyl) groups [GO:0016765]; enterobactin biosynthetic process [GO:0009…	2,3-dihydroxybenzoate-serine ligase activity [GO:0047527]; identical protein binding [GO:0042802]; isochorismatase activity [GO:0008908]; magnesium ion binding [GO:0000287]; phosphopantetheine binding [GO:0031177]; transferase activity, transferring alkyl or aryl (other than methyl) groups [GO:0016765]	SUBCELLULAR LOCATION: Cytoplasm {ECO:0000269|PubMed:10692387}.
ENTC_ECOLI	P0AEJ2	Isochorismate synthase EntC (EC 5.4.4.2) (Isochorismate mutase)	entC	35	39	-0.170063	-0.505306	enterobactin biosynthetic process [GO:0009239]		isochorismate synthase activity [GO:0008909]; magnesium ion binding [GO:0000287]; enterobactin biosynthetic process [GO:0009239]	isochorismate synthase activity [GO:0008909]; magnesium ion binding [GO:0000287]
ENTE_ECOLI	P10378	Enterobactin synthase component E (EC 6.3.2.14) (2,3-dihydroxybenzoate-AMP ligase) (DHB-AMP ligase) (2,3-dihydroxybenzoate-AMP synthase) (EC 2.7.7.58) (Dihydroxybenzoic acid-activating enzyme) (Enterochelin synthase E) (S-dihydroxybenzoyltransferase) (EC 2.5.1.-)	entE	35	25	-0.173091	-0.215407	enterobactin biosynthetic process [GO:0009239]	cytosol [GO:0005829]; membrane [GO:0016020]	cytosol [GO:0005829]; membrane [GO:0016020]; (2,3-dihydroxybenzoyl)adenylate synthase activity [GO:0008668]; 2,3-dihydroxybenzoate-serine ligase activity [GO:0047527]; acyltransferase activity [GO:0016746]; ATP binding [GO:0005524]; enterobactin biosynthetic process [GO:0009239]	(2,3-dihydroxybenzoyl)adenylate synthase activity [GO:0008668]; 2,3-dihydroxybenzoate-serine ligase activity [GO:0047527]; acyltransferase activity [GO:0016746]; ATP binding [GO:0005524]	SUBCELLULAR LOCATION: Membrane {ECO:0000269|PubMed:10692387}.
ENTF_ECOLI	P11454	Enterobactin synthase component F (EC 2.7.7.-) (Enterochelin synthase F) (Serine-activating enzyme) (Seryl-AMP ligase)	entF	35	42	-0.114192	-0.206	amino acid activation for nonribosomal peptide biosynthetic process [GO:0043041]; enterobactin biosynthetic process [GO:0009239]; secondary metabolite biosynthetic process [GO:0044550]	cytoplasm [GO:0005737]; cytosol [GO:0005829]; enterobactin synthetase complex [GO:0009366]; plasma membrane [GO:0005886]	cytoplasm [GO:0005737]; cytosol [GO:0005829]; enterobactin synthetase complex [GO:0009366]; plasma membrane [GO:0005886]; 2,3-dihydroxybenzoate-serine ligase activity [GO:0047527]; ATP binding [GO:0005524]; nucleotidyltransferase activity [GO:0016779]; phosphopantetheine binding [GO:0031177]; amino acid activation for nonribosomal peptide biosynthetic process [GO:0043041]; enterobactin biosynthet…	2,3-dihydroxybenzoate-serine ligase activity [GO:0047527]; ATP binding [GO:0005524]; nucleotidyltransferase activity [GO:0016779]; phosphopantetheine binding [GO:0031177]
ENTH_ECOLI	P0A8Y8	Proofreading thioesterase EntH (EC 3.1.2.-) (Enterobactin synthase component H) (p15)	entH	1	2	-0.231717	0.0301102	enterobactin biosynthetic process [GO:0009239]	cytosol [GO:0005829]	cytosol [GO:0005829]; 1,4-dihydroxy-2-naphthoyl-CoA thioesterase activity [GO:0061522]; CoA hydrolase activity [GO:0016289]; hydrolase activity, acting on ester bonds [GO:0016788]; identical protein binding [GO:0042802]; thiolester hydrolase activity [GO:0016790]; enterobactin biosynthetic process [GO:0009239]	1,4-dihydroxy-2-naphthoyl-CoA thioesterase activity [GO:0061522]; CoA hydrolase activity [GO:0016289]; hydrolase activity, acting on ester bonds [GO:0016788]; identical protein binding [GO:0042802]; thiolester hydrolase activity [GO:0016790]	SUBCELLULAR LOCATION: Cytoplasm {ECO:0000255|HAMAP-Rule:MF_00907, ECO:0000269|PubMed:17675380}.
ENVC_ECOLI	P37690	Murein hydrolase activator EnvC (Septal ring factor)	envC	12	12	0.0494911	-0.283026	cell cycle [GO:0007049]; peptidoglycan-based cell wall biogenesis [GO:0009273]; positive regulation of hydrolase activity [GO:0051345]; response to drug [GO:0042493]; response to radiation [GO:0009314]; septum digestion after cytokinesis [GO:0000920]	cell division site [GO:0032153]; outer membrane-bounded periplasmic space [GO:0030288]; periplasmic space [GO:0042597]; plasma membrane [GO:0005886]	cell division site [GO:0032153]; outer membrane-bounded periplasmic space [GO:0030288]; periplasmic space [GO:0042597]; plasma membrane [GO:0005886]; hydrolase activity [GO:0016787]; metalloendopeptidase activity [GO:0004222]; cell cycle [GO:0007049]; peptidoglycan-based cell wall biogenesis [GO:0009273]; positive regulation of hydrolase activity [GO:0051345]; response to drug [GO:0042493]; respo…	hydrolase activity [GO:0016787]; metalloendopeptidase activity [GO:0004222]	SUBCELLULAR LOCATION: Periplasm {ECO:0000269|PubMed:12113939, ECO:0000269|PubMed:15165230, ECO:0000269|PubMed:19525345}. Note=Localizes at the septal ring.
ENVZ_ECOLI	P0AEJ4	Sensor histidine kinase EnvZ (EC 2.7.13.3) (Osmolarity sensor protein EnvZ)	envZ	2	5	-0.0849525	-0.393199	peptidyl-histidine phosphorylation [GO:0018106]; phosphorelay signal transduction system [GO:0000160]; phosphorylation [GO:0016310]; protein autophosphorylation [GO:0046777]; protein dephosphorylation [GO:0006470]; response to osmotic stress [GO:0006970]	cytosol [GO:0005829]; integral component of plasma membrane [GO:0005887]; outer membrane-bounded periplasmic space [GO:0030288]	cytosol [GO:0005829]; integral component of plasma membrane [GO:0005887]; outer membrane-bounded periplasmic space [GO:0030288]; ATP binding [GO:0005524]; identical protein binding [GO:0042802]; phosphoprotein phosphatase activity [GO:0004721]; phosphorelay sensor kinase activity [GO:0000155]; peptidyl-histidine phosphorylation [GO:0018106]; phosphorelay signal transduction system [GO:0000160]; p…	ATP binding [GO:0005524]; identical protein binding [GO:0042802]; phosphoprotein phosphatase activity [GO:0004721]; phosphorelay sensor kinase activity [GO:0000155]	SUBCELLULAR LOCATION: Cell inner membrane {ECO:0000269|PubMed:1323560, ECO:0000269|PubMed:15919996, ECO:0000269|PubMed:2824492}; Multi-pass membrane protein {ECO:0000305|PubMed:1323560, ECO:0000305|PubMed:15919996, ECO:0000305|PubMed:2824492}.
EPMA_ECOLI	P0A8N7	Elongation factor P--(R)-beta-lysine ligase (EF-P--(R)-beta-lysine ligase) (EC 6.3.1.-) (EF-P post-translational modification enzyme A) (EF-P-lysine lysyltransferase) (GX)	epmA	9	13	-0.0333796	0.526479	lysyl-tRNA aminoacylation [GO:0006430]; protein-lysine lysylation [GO:0071915]; protein-N6-(L-lysyl)-L-lysine modification to protein-N6-(beta-lysyl)-L-lysine [GO:0072581]	cytosol [GO:0005829]	cytosol [GO:0005829]; acid-ammonia (or amide) ligase activity [GO:0016880]; ATP binding [GO:0005524]; lysine-tRNA ligase activity [GO:0004824]; protein-lysine lysyltransferase activity [GO:0052868]; tRNA binding [GO:0000049]; lysyl-tRNA aminoacylation [GO:0006430]; protein-lysine lysylation [GO:0071915]; protein-N6-(L-lysyl)-L-lysine modification to protein-N6-(beta-lysyl)-L-lysine [GO:0072581]	acid-ammonia (or amide) ligase activity [GO:0016880]; ATP binding [GO:0005524]; lysine-tRNA ligase activity [GO:0004824]; protein-lysine lysyltransferase activity [GO:0052868]; tRNA binding [GO:0000049]
EPMB_ECOLI	P39280	L-lysine 2,3-aminomutase (LAM) (EC 5.4.3.-) (EF-P post-translational modification enzyme B)	epmB	5	3	-0.0528593	-0.501793			4 iron, 4 sulfur cluster binding [GO:0051539]; intramolecular transferase activity, transferring amino groups [GO:0016869]; metal ion binding [GO:0046872]	4 iron, 4 sulfur cluster binding [GO:0051539]; intramolecular transferase activity, transferring amino groups [GO:0016869]; metal ion binding [GO:0046872]
EPMC_ECOLI	P76938	Elongation factor P hydroxylase (EF-P hydroxylase) (EC 1.14.-.-) (EF-P post-translational modification enzyme C)	epmC	4	4	-0.107985	-0.87953	peptidyl-lysine hydroxylation involved in bacterial-type EF-P lysine modification [GO:1901260]; post-translational protein modification [GO:0043687]		metal ion binding [GO:0046872]; monooxygenase activity [GO:0004497]; oxidoreductase activity, acting on paired donors, with incorporation or reduction of molecular oxygen, NAD(P)H as one donor, and incorporation of one atom of oxygen [GO:0016709]; peptidyl-lysine hydroxylation involved in bacterial-type EF-P lysine modification [GO:1901260]; post-translational protein modification [GO:0043687]	metal ion binding [GO:0046872]; monooxygenase activity [GO:0004497]; oxidoreductase activity, acting on paired donors, with incorporation or reduction of molecular oxygen, NAD(P)H as one donor, and incorporation of one atom of oxygen [GO:0016709]
EPTB_ECOLI	P37661	Kdo(2)-lipid A phosphoethanolamine 7''-transferase (EC 2.7.8.42) (Phosphoethanolamine transferase EptB)	eptB	5	5	0.0511781	-0.557655	lipid A biosynthetic process [GO:0009245]; lipopolysaccharide core region biosynthetic process [GO:0009244]	integral component of membrane [GO:0016021]; plasma membrane [GO:0005886]	integral component of membrane [GO:0016021]; plasma membrane [GO:0005886]; phosphatidylethanolamine:Kdo2-lipid A phosphoethanolamine transferase activity [GO:0043838]; sulfuric ester hydrolase activity [GO:0008484]; lipid A biosynthetic process [GO:0009245]; lipopolysaccharide core region biosynthetic process [GO:0009244]	phosphatidylethanolamine:Kdo2-lipid A phosphoethanolamine transferase activity [GO:0043838]; sulfuric ester hydrolase activity [GO:0008484]	SUBCELLULAR LOCATION: Cell inner membrane {ECO:0000269|PubMed:15795227}; Multi-pass membrane protein {ECO:0000269|PubMed:15795227}.
EPTC_ECOLI	P0CB39	Phosphoethanolamine transferase EptC (EC 2.7.-.-)	eptC	34	39	0.0784584	-0.785062	lipopolysaccharide core region biosynthetic process [GO:0009244]	integral component of membrane [GO:0016021]; plasma membrane [GO:0005886]	integral component of membrane [GO:0016021]; plasma membrane [GO:0005886]; phosphotransferase activity, phosphate group as acceptor [GO:0016776]; sulfuric ester hydrolase activity [GO:0008484]; lipopolysaccharide core region biosynthetic process [GO:0009244]	phosphotransferase activity, phosphate group as acceptor [GO:0016776]; sulfuric ester hydrolase activity [GO:0008484]	SUBCELLULAR LOCATION: Cell inner membrane {ECO:0000269|PubMed:16079137}; Multi-pass membrane protein {ECO:0000269|PubMed:16079137}.
ERA_ECOLI	P06616	GTPase Era (ERA) (GTP-binding protein Era)	era	27	21	-0.00757313	-0.154805	protein autophosphorylation [GO:0046777]; protein phosphorylation [GO:0006468]; ribosomal small subunit assembly [GO:0000028]; ribosomal small subunit biogenesis [GO:0042274]	cytoplasm [GO:0005737]; cytosol [GO:0005829]; extrinsic component of cytoplasmic side of plasma membrane [GO:0031234]; plasma membrane [GO:0005886]	cytoplasm [GO:0005737]; cytosol [GO:0005829]; extrinsic component of cytoplasmic side of plasma membrane [GO:0031234]; plasma membrane [GO:0005886]; GTP binding [GO:0005525]; GTPase activity [GO:0003924]; guanosine tetraphosphate binding [GO:0097216]; ribosomal small subunit binding [GO:0043024]; RNA binding [GO:0003723]; rRNA binding [GO:0019843]; small ribosomal subunit rRNA binding [GO:0070181…	GTPase activity [GO:0003924]; GTP binding [GO:0005525]; guanosine tetraphosphate binding [GO:0097216]; ribosomal small subunit binding [GO:0043024]; RNA binding [GO:0003723]; rRNA binding [GO:0019843]; small ribosomal subunit rRNA binding [GO:0070181]	SUBCELLULAR LOCATION: Cytoplasm {ECO:0000269|PubMed:8282709}. Cell inner membrane {ECO:0000269|PubMed:8282709}; Peripheral membrane protein {ECO:0000269|PubMed:8282709}; Cytoplasmic side {ECO:0000269|PubMed:8282709}. Note=Binding is GDP or GTP-dependent, slightly more protein is bound in the presence of GTP than GDP.
ERFK_ECOLI	P39176	Probable L,D-transpeptidase ErfK/SrfK (EC 2.-.-.-)	erfK	11	13	-0.0487421	-0.769326	cell wall organization [GO:0071555]; peptidoglycan-protein cross-linking [GO:0018104]; regulation of cell shape [GO:0008360]	periplasmic space [GO:0042597]	periplasmic space [GO:0042597]; glycosyltransferase activity [GO:0016757]; peptidoglycan L,D-transpeptidase activity [GO:0071972]; cell wall organization [GO:0071555]; peptidoglycan-protein cross-linking [GO:0018104]; regulation of cell shape [GO:0008360]	glycosyltransferase activity [GO:0016757]; peptidoglycan L,D-transpeptidase activity [GO:0071972]	SUBCELLULAR LOCATION: Periplasm {ECO:0000305}.
ERPA_ECOLI	P0ACC3	Iron-sulfur cluster insertion protein ErpA	erpA	37	31	-0.0088059	-0.477068	aerobic respiration [GO:0009060]; anaerobic respiration [GO:0009061]; iron-sulfur cluster assembly [GO:0016226]; protein maturation [GO:0051604]; protein maturation by [4Fe-4S] cluster transfer [GO:0106035]	cytosol [GO:0005829]	cytosol [GO:0005829]; 2 iron, 2 sulfur cluster binding [GO:0051537]; 4 iron, 4 sulfur cluster binding [GO:0051539]; iron ion binding [GO:0005506]; aerobic respiration [GO:0009060]; anaerobic respiration [GO:0009061]; iron-sulfur cluster assembly [GO:0016226]; protein maturation [GO:0051604]; protein maturation by [4Fe-4S] cluster transfer [GO:0106035]	2 iron, 2 sulfur cluster binding [GO:0051537]; 4 iron, 4 sulfur cluster binding [GO:0051539]; iron ion binding [GO:0005506]
ETK_ECOLI	P38134	Tyrosine-protein kinase etk (EC 2.7.10.-)	etk	1	3	0.0190977	0.226343	extracellular polysaccharide biosynthetic process [GO:0045226]; lipopolysaccharide biosynthetic process [GO:0009103]; peptidyl-tyrosine autophosphorylation [GO:0038083]	integral component of membrane [GO:0016021]; plasma membrane [GO:0005886]	integral component of membrane [GO:0016021]; plasma membrane [GO:0005886]; ATP binding [GO:0005524]; identical protein binding [GO:0042802]; protein tyrosine kinase activity [GO:0004713]; transmembrane receptor protein tyrosine kinase activity [GO:0004714]; extracellular polysaccharide biosynthetic process [GO:0045226]; lipopolysaccharide biosynthetic process [GO:0009103]; peptidyl-tyrosine autop…	ATP binding [GO:0005524]; identical protein binding [GO:0042802]; protein tyrosine kinase activity [GO:0004713]; transmembrane receptor protein tyrosine kinase activity [GO:0004714]	SUBCELLULAR LOCATION: Cell inner membrane; Multi-pass membrane protein. Note=When the protein is overexpressed.
ETTA_ECOLI	P0A9W3	Energy-dependent translational throttle protein EttA (EC 3.6.1.-) (Translational regulatory factor EttA)	ettA	209	184	-0.0905957	0.0339254	negative regulation of translational elongation [GO:0045900]; translation [GO:0006412]	cytoplasm [GO:0005737]	cytoplasm [GO:0005737]; ATP binding [GO:0005524]; ATP hydrolysis activity [GO:0140603]; ATPase-coupled transmembrane transporter activity [GO:0042626]; ribosome binding [GO:0043022]; rRNA binding [GO:0019843]; tRNA binding [GO:0000049]; negative regulation of translational elongation [GO:0045900]; translation [GO:0006412]	ATPase-coupled transmembrane transporter activity [GO:0042626]; ATP binding [GO:0005524]; ATP hydrolysis activity [GO:0140603]; ribosome binding [GO:0043022]; rRNA binding [GO:0019843]; tRNA binding [GO:0000049]	SUBCELLULAR LOCATION: Cytoplasm {ECO:0000255|HAMAP-Rule:MF_00847, ECO:0000269|PubMed:24389466}. Note=Associates with ribosomes and polysomes. {ECO:0000255|HAMAP-Rule:MF_00847}.
EUTB_ECOLI	P0AEJ6	Ethanolamine ammonia-lyase large subunit (EAL large subunit) (EC 4.3.1.7) (Ethanolamine ammonia-lyase alpha subunit) (Ethanolamine ammonia-lyase heavy chain) (Ethanolamine deaminase large subunit)	eutB	7	7	0.040996	0.276854	cellular amino acid metabolic process [GO:0006520]; ethanolamine catabolic process [GO:0046336]	cytosol [GO:0005829]; ethanolamine ammonia-lyase complex [GO:0009350]	cytosol [GO:0005829]; ethanolamine ammonia-lyase complex [GO:0009350]; cobalamin binding [GO:0031419]; ethanolamine ammonia-lyase activity [GO:0008851]; cellular amino acid metabolic process [GO:0006520]; ethanolamine catabolic process [GO:0046336]	cobalamin binding [GO:0031419]; ethanolamine ammonia-lyase activity [GO:0008851]	SUBCELLULAR LOCATION: Bacterial microcompartment {ECO:0000255|HAMAP-Rule:MF_00861}.
EUTC_ECOLI	P19636	Ethanolamine ammonia-lyase small subunit (EAL small subunit) (EC 4.3.1.7) (Ethanolamine ammonia-lyase beta subunit) (Ethanolamine ammonia-lyase light chain) (Ethanolamine deaminase small subunit)	eutC	13	11	-0.00150762	0.224869	cellular amino acid metabolic process [GO:0006520]; ethanolamine catabolic process [GO:0046336]	ethanolamine ammonia-lyase complex [GO:0009350]	ethanolamine ammonia-lyase complex [GO:0009350]; cobalamin binding [GO:0031419]; ethanolamine ammonia-lyase activity [GO:0008851]; cellular amino acid metabolic process [GO:0006520]; ethanolamine catabolic process [GO:0046336]	cobalamin binding [GO:0031419]; ethanolamine ammonia-lyase activity [GO:0008851]	SUBCELLULAR LOCATION: Bacterial microcompartment {ECO:0000255|HAMAP-Rule:MF_00601}.
EUTL_ECOLI	P76541	Bacterial microcompartment shell protein EutL (BMC-T) (Ethanolamine utilization protein EutL)	eutL	4	8	0.0618684	0.564821	ethanolamine catabolic process [GO:0046336]	ethanolamine degradation polyhedral organelle [GO:0031471]	ethanolamine degradation polyhedral organelle [GO:0031471]; identical protein binding [GO:0042802]; structural molecule activity [GO:0005198]; zinc ion binding [GO:0008270]; ethanolamine catabolic process [GO:0046336]	identical protein binding [GO:0042802]; structural molecule activity [GO:0005198]; zinc ion binding [GO:0008270]	SUBCELLULAR LOCATION: Bacterial microcompartment {ECO:0000305|PubMed:19451619, ECO:0000305|PubMed:20044574, ECO:0000305|PubMed:20851901}.
EUTM_ECOLI	P0ABF4	Bacterial microcompartment shell protein EutM (Bacterial microcompartment protein homohexamer) (BMC-H) (Ethanolamine utilization protein EutM)	eutM	1	1	-0.189717	0.177134	ethanolamine catabolic process [GO:0046336]; protein hexamerization [GO:0034214]	ethanolamine degradation polyhedral organelle [GO:0031471]	ethanolamine degradation polyhedral organelle [GO:0031471]; identical protein binding [GO:0042802]; structural molecule activity [GO:0005198]; ethanolamine catabolic process [GO:0046336]; protein hexamerization [GO:0034214]	identical protein binding [GO:0042802]; structural molecule activity [GO:0005198]	SUBCELLULAR LOCATION: Bacterial microcompartment {ECO:0000250|UniProtKB:P41791}.
EVGA_ECOLI	P0ACZ4	DNA-binding transcriptional activator EvgA	evgA	27	23	-0.0418057	-0.752707	phosphorelay signal transduction system [GO:0000160]; regulation of transcription, DNA-templated [GO:0006355]	cytosol [GO:0005829]	cytosol [GO:0005829]; sequence-specific DNA binding [GO:0043565]; phosphorelay signal transduction system [GO:0000160]; regulation of transcription, DNA-templated [GO:0006355]	sequence-specific DNA binding [GO:0043565]	SUBCELLULAR LOCATION: Cytoplasm {ECO:0000305}.
EVGS_ECOLI	P30855	Sensor protein EvgS (EC 2.7.13.3)	evgS	1	6	-0.0196713	-0.48719	phosphorelay signal transduction system [GO:0000160]; protein autophosphorylation [GO:0046777]; response to acidic pH [GO:0010447]	integral component of membrane [GO:0016021]; plasma membrane [GO:0005886]	integral component of membrane [GO:0016021]; plasma membrane [GO:0005886]; ATP binding [GO:0005524]; phosphorelay sensor kinase activity [GO:0000155]; phosphorelay signal transduction system [GO:0000160]; protein autophosphorylation [GO:0046777]; response to acidic pH [GO:0010447]	ATP binding [GO:0005524]; phosphorelay sensor kinase activity [GO:0000155]	SUBCELLULAR LOCATION: Cell inner membrane {ECO:0000305}; Multi-pass membrane protein {ECO:0000305}.
EX1_ECOLI	P04995	Exodeoxyribonuclease I (ExoI) (Exonuclease I) (EC 3.1.11.1) (DNA deoxyribophosphodiesterase) (dRPase)	sbcB	14	12	-0.0291	-0.104576	DNA catabolic process [GO:0006308]; DNA catabolic process, exonucleolytic [GO:0000738]; DNA repair [GO:0006281]		3'-5'-exoribonuclease activity [GO:0000175]; 5'-deoxyribose-5-phosphate lyase activity [GO:0051575]; exodeoxyribonuclease I activity [GO:0008852]; magnesium ion binding [GO:0000287]; single-stranded DNA 3'-5' exodeoxyribonuclease activity [GO:0008310]; single-stranded DNA binding [GO:0003697]; DNA catabolic process [GO:0006308]; DNA catabolic process, exonucleolytic [GO:0000738]; DNA repair [GO:0…	3'-5'-exoribonuclease activity [GO:0000175]; 5'-deoxyribose-5-phosphate lyase activity [GO:0051575]; exodeoxyribonuclease I activity [GO:0008852]; magnesium ion binding [GO:0000287]; single-stranded DNA 3'-5' exodeoxyribonuclease activity [GO:0008310]; single-stranded DNA binding [GO:0003697]
EX3_ECOLI	P09030	Exodeoxyribonuclease III (EXO III) (Exonuclease III) (EC 3.1.11.2) (AP endonuclease VI)	xthA	59	50	-0.042107	0.579903	cellular response to DNA damage stimulus [GO:0006974]; DNA repair [GO:0006281]	cytosol [GO:0005829]	cytosol [GO:0005829]; DNA binding [GO:0003677]; endonuclease activity [GO:0004519]; exodeoxyribonuclease III activity [GO:0008853]; exonuclease activity [GO:0004527]; metal ion binding [GO:0046872]; cellular response to DNA damage stimulus [GO:0006974]; DNA repair [GO:0006281]	DNA binding [GO:0003677]; endonuclease activity [GO:0004519]; exodeoxyribonuclease III activity [GO:0008853]; exonuclease activity [GO:0004527]; metal ion binding [GO:0046872]
EX7L_ECOLI	P04994	Exodeoxyribonuclease 7 large subunit (EC 3.1.11.6) (Exodeoxyribonuclease VII large subunit) (Exonuclease VII large subunit)	xseA	15	19	0.063856	-0.220011	DNA catabolic process [GO:0006308]	cytoplasm [GO:0005737]; exodeoxyribonuclease VII complex [GO:0009318]	cytoplasm [GO:0005737]; exodeoxyribonuclease VII complex [GO:0009318]; exodeoxyribonuclease VII activity [GO:0008855]; nucleic acid binding [GO:0003676]; DNA catabolic process [GO:0006308]	exodeoxyribonuclease VII activity [GO:0008855]; nucleic acid binding [GO:0003676]	SUBCELLULAR LOCATION: Cytoplasm {ECO:0000305|PubMed:6284744}.
EX7S_ECOLI	P0A8G9	Exodeoxyribonuclease 7 small subunit (EC 3.1.11.6) (Exodeoxyribonuclease VII small subunit) (Exonuclease VII small subunit)	xseB	30	23	0.0117525	-0.098034	DNA catabolic process [GO:0006308]	cytosol [GO:0005829]; exodeoxyribonuclease VII complex [GO:0009318]	cytosol [GO:0005829]; exodeoxyribonuclease VII complex [GO:0009318]; exodeoxyribonuclease VII activity [GO:0008855]; DNA catabolic process [GO:0006308]	exodeoxyribonuclease VII activity [GO:0008855]	SUBCELLULAR LOCATION: Cytoplasm {ECO:0000255|HAMAP-Rule:MF_00337, ECO:0000305|PubMed:6284744}.
EXBB_ECOLI	P0ABU7	Biopolymer transport protein ExbB	exbB	24	15	-0.0840146	-0.716032	bacteriocin transport [GO:0043213]; protein import [GO:0017038]; protein stabilization [GO:0050821]	integral component of plasma membrane [GO:0005887]; plasma membrane [GO:0005886]; plasma membrane protein complex [GO:0098797]	integral component of plasma membrane [GO:0005887]; plasma membrane [GO:0005886]; plasma membrane protein complex [GO:0098797]; energy transducer activity [GO:0031992]; identical protein binding [GO:0042802]; transmembrane transporter activity [GO:0022857]; bacteriocin transport [GO:0043213]; protein import [GO:0017038]; protein stabilization [GO:0050821]	energy transducer activity [GO:0031992]; identical protein binding [GO:0042802]; transmembrane transporter activity [GO:0022857]	SUBCELLULAR LOCATION: Cell inner membrane; Multi-pass membrane protein.
EXBD_ECOLI	P0ABV2	Biopolymer transport protein ExbD	exbD	34	31	-0.0531722	-0.674601	bacteriocin transport [GO:0043213]; protein stabilization [GO:0050821]; protein transport [GO:0015031]	integral component of plasma membrane [GO:0005887]; plasma membrane [GO:0005886]; plasma membrane protein complex [GO:0098797]	integral component of plasma membrane [GO:0005887]; plasma membrane [GO:0005886]; plasma membrane protein complex [GO:0098797]; energy transducer activity [GO:0031992]; identical protein binding [GO:0042802]; transmembrane transporter activity [GO:0022857]; bacteriocin transport [GO:0043213]; protein stabilization [GO:0050821]; protein transport [GO:0015031]	energy transducer activity [GO:0031992]; identical protein binding [GO:0042802]; transmembrane transporter activity [GO:0022857]	SUBCELLULAR LOCATION: Cell inner membrane; Single-pass type II membrane protein.
EXOX_ECOLI	P0AEK0	Exodeoxyribonuclease 10 (EC 3.1.11.-) (Exodeoxyribonuclease X) (Exo X) (Exonuclease X)	exoX	8	8	0.0602432	0.472515	DNA replication proofreading [GO:0045004]; mismatch repair [GO:0006298]	cytosol [GO:0005829]	cytosol [GO:0005829]; 3'-5' exonuclease activity [GO:0008408]; nucleic acid binding [GO:0003676]; DNA replication proofreading [GO:0045004]; mismatch repair [GO:0006298]	3'-5' exonuclease activity [GO:0008408]; nucleic acid binding [GO:0003676]
EXUR_ECOLI	P0ACL2	Exu regulon transcriptional regulator	exuR	7	11	0.0171736	-0.527677	negative regulation of transcription, DNA-templated [GO:0045892]		DNA binding [GO:0003677]; DNA-binding transcription factor activity [GO:0003700]; negative regulation of transcription, DNA-templated [GO:0045892]	DNA binding [GO:0003677]; DNA-binding transcription factor activity [GO:0003700]
F16PA_ECOLI	P0A993	Fructose-1,6-bisphosphatase class 1 (FBPase class 1) (EC 3.1.3.11) (D-fructose-1,6-bisphosphate 1-phosphohydrolase class 1)	fbp	69	58	-0.0107364	-0.246963	fructose 1,6-bisphosphate metabolic process [GO:0030388]; fructose 6-phosphate metabolic process [GO:0006002]; fructose metabolic process [GO:0006000]; gluconeogenesis [GO:0006094]; sucrose biosynthetic process [GO:0005986]	cytoplasm [GO:0005737]; cytosol [GO:0005829]; protein-containing complex [GO:0032991]	cytoplasm [GO:0005737]; cytosol [GO:0005829]; protein-containing complex [GO:0032991]; fructose 1,6-bisphosphate 1-phosphatase activity [GO:0042132]; identical protein binding [GO:0042802]; magnesium ion binding [GO:0000287]; nucleotide binding [GO:0000166]; fructose 1,6-bisphosphate metabolic process [GO:0030388]; fructose 6-phosphate metabolic process [GO:0006002]; fructose metabolic process [G…	fructose 1,6-bisphosphate 1-phosphatase activity [GO:0042132]; identical protein binding [GO:0042802]; magnesium ion binding [GO:0000287]; nucleotide binding [GO:0000166]	SUBCELLULAR LOCATION: Cytoplasm {ECO:0000255|HAMAP-Rule:MF_01855, ECO:0000305}.
FABA_ECOLI	P0A6Q3	3-hydroxydecanoyl-[acyl-carrier-protein] dehydratase (EC 4.2.1.59) (3-hydroxyacyl-[acyl-carrier-protein] dehydratase FabA) (Beta-hydroxydecanoyl thioester dehydrase) (Trans-2-decenoyl-[acyl-carrier-protein] isomerase) (EC 5.3.3.14)	fabA	101	83	-0.0314679	0.739998	fatty acid biosynthetic process [GO:0006633]; lipid biosynthetic process [GO:0008610]	cytosol [GO:0005829]	cytosol [GO:0005829]; (3R)-hydroxymyristoyl-[acyl-carrier-protein] dehydratase activity [GO:0008659]; 3-hydroxydecanoyl-[acyl-carrier-protein] dehydratase activity [GO:0008693]; 3-hydroxyoctanoyl-[acyl-carrier-protein] dehydratase activity [GO:0047451]; 3-hydroxypalmitoyl-[acyl-carrier-protein] dehydratase activity [GO:0004317]; trans-2-decenoyl-acyl-carrier-protein isomerase activity [GO:0034017…	(3R)-hydroxymyristoyl-[acyl-carrier-protein] dehydratase activity [GO:0008659]; 3-hydroxydecanoyl-[acyl-carrier-protein] dehydratase activity [GO:0008693]; 3-hydroxyoctanoyl-[acyl-carrier-protein] dehydratase activity [GO:0047451]; 3-hydroxypalmitoyl-[acyl-carrier-protein] dehydratase activity [GO:0004317]; trans-2-decenoyl-acyl-carrier-protein isomerase activity [GO:0034017]	SUBCELLULAR LOCATION: Cytoplasm.
FABB_ECOLI	P0A953	3-oxoacyl-[acyl-carrier-protein] synthase 1 (EC 2.3.1.41) (3-oxoacyl-[acyl-carrier-protein] synthase I) (Beta-ketoacyl-ACP synthase I) (KAS I)	fabB	103	80	-0.074853	0.559412	fatty acid biosynthetic process [GO:0006633]; lipid biosynthetic process [GO:0008610]	cytosol [GO:0005829]	cytosol [GO:0005829]; 3-oxoacyl-[acyl-carrier-protein] synthase activity [GO:0004315]; fatty acid biosynthetic process [GO:0006633]; lipid biosynthetic process [GO:0008610]	3-oxoacyl-[acyl-carrier-protein] synthase activity [GO:0004315]	SUBCELLULAR LOCATION: Cytoplasm.
FABD_ECOLI	P0AAI9	Malonyl CoA-acyl carrier protein transacylase (MCT) (EC 2.3.1.39)	fabD	157	121	-0.0882937	1.11401	fatty acid biosynthetic process [GO:0006633]	cytosol [GO:0005829]	cytosol [GO:0005829]; [acyl-carrier-protein] S-malonyltransferase activity [GO:0004314]; fatty acid biosynthetic process [GO:0006633]	[acyl-carrier-protein] S-malonyltransferase activity [GO:0004314]
FABF_ECOLI	P0AAI5	3-oxoacyl-[acyl-carrier-protein] synthase 2 (EC 2.3.1.179) (3-oxoacyl-[acyl-carrier-protein] synthase II) (Beta-ketoacyl-ACP synthase II) (KAS II)	fabF	85	67	0.0477212	1.19706	fatty acid biosynthetic process [GO:0006633]	cytosol [GO:0005829]	cytosol [GO:0005829]; 3-oxoacyl-[acyl-carrier-protein] synthase activity [GO:0004315]; beta-ketoacyl-acyl-carrier-protein synthase II activity [GO:0033817]; fatty acid biosynthetic process [GO:0006633]	3-oxoacyl-[acyl-carrier-protein] synthase activity [GO:0004315]; beta-ketoacyl-acyl-carrier-protein synthase II activity [GO:0033817]
FABG_ECOLI	P0AEK2	3-oxoacyl-[acyl-carrier-protein] reductase FabG (EC 1.1.1.100) (3-ketoacyl-acyl carrier protein reductase) (Beta-Ketoacyl-acyl carrier protein reductase) (Beta-ketoacyl-ACP reductase)	fabG	139	105	-0.0904102	1.10782	biotin biosynthetic process [GO:0009102]; fatty acid biosynthetic process [GO:0006633]; fatty acid elongation [GO:0030497]; lipid biosynthetic process [GO:0008610]	cytosol [GO:0005829]	cytosol [GO:0005829]; 3-oxo-glutaryl-[acp] methyl ester reductase activity [GO:0102131]; 3-oxo-pimeloyl-[acp] methyl ester reductase activity [GO:0102132]; 3-oxoacyl-[acyl-carrier-protein] reductase (NADPH) activity [GO:0004316]; identical protein binding [GO:0042802]; metal ion binding [GO:0046872]; NAD binding [GO:0051287]; NADP binding [GO:0050661]; oxidoreductase activity, acting on the CH-OH…	3-oxoacyl-[acyl-carrier-protein] reductase (NADPH) activity [GO:0004316]; 3-oxo-glutaryl-[acp] methyl ester reductase activity [GO:0102131]; 3-oxo-pimeloyl-[acp] methyl ester reductase activity [GO:0102132]; identical protein binding [GO:0042802]; metal ion binding [GO:0046872]; NAD binding [GO:0051287]; NADP binding [GO:0050661]; oxidoreductase activity, acting on the CH-OH group of donors, NAD …
FABH_ECOLI	P0A6R0	3-oxoacyl-[acyl-carrier-protein] synthase 3 (EC 2.3.1.180) (3-oxoacyl-[acyl-carrier-protein] synthase III) (Beta-ketoacyl-ACP synthase III) (KAS III) (EcFabH)	fabH	87	65	-0.273164	0.760789	fatty acid biosynthetic process [GO:0006633]; fatty acid metabolic process [GO:0006631]	cytosol [GO:0005829]	cytosol [GO:0005829]; 3-oxoacyl-[acyl-carrier-protein] synthase activity [GO:0004315]; beta-ketoacyl-acyl-carrier-protein synthase III activity [GO:0033818]; fatty acid biosynthetic process [GO:0006633]; fatty acid metabolic process [GO:0006631]	3-oxoacyl-[acyl-carrier-protein] synthase activity [GO:0004315]; beta-ketoacyl-acyl-carrier-protein synthase III activity [GO:0033818]	SUBCELLULAR LOCATION: Cytoplasm {ECO:0000255|HAMAP-Rule:MF_01815}.
FABI_ECOLI	P0AEK4	Enoyl-[acyl-carrier-protein] reductase [NADH] FabI (ENR) (EC 1.3.1.9) (NADH-dependent enoyl-ACP reductase)	fabI	139	108	0.0216687	0.734037	biotin biosynthetic process [GO:0009102]; fatty acid elongation [GO:0030497]; lipid biosynthetic process [GO:0008610]; response to antibiotic [GO:0046677]	catalytic complex [GO:1902494]; cytosol [GO:0005829]; membrane [GO:0016020]	catalytic complex [GO:1902494]; cytosol [GO:0005829]; membrane [GO:0016020]; enoyl-[acyl-carrier-protein] reductase (NADH) activity [GO:0004318]; enoyl-[acyl-carrier-protein] reductase activity [GO:0016631]; identical protein binding [GO:0042802]; NADH binding [GO:0070404]; biotin biosynthetic process [GO:0009102]; fatty acid elongation [GO:0030497]; lipid biosynthetic process [GO:0008610]; respo…	enoyl-[acyl-carrier-protein] reductase (NADH) activity [GO:0004318]; enoyl-[acyl-carrier-protein] reductase activity [GO:0016631]; identical protein binding [GO:0042802]; NADH binding [GO:0070404]
FABR_ECOLI	P0ACU5	HTH-type transcriptional repressor FabR	fabR	11	8	0.00622641	-0.419869	fatty acid biosynthetic process [GO:0006633]; negative regulation of fatty acid biosynthetic process [GO:0045717]; negative regulation of transcription, DNA-templated [GO:0045892]	cytoplasm [GO:0005737]	cytoplasm [GO:0005737]; DNA binding [GO:0003677]; DNA-binding transcription factor activity [GO:0003700]; fatty acid biosynthetic process [GO:0006633]; negative regulation of fatty acid biosynthetic process [GO:0045717]; negative regulation of transcription, DNA-templated [GO:0045892]	DNA binding [GO:0003677]; DNA-binding transcription factor activity [GO:0003700]	SUBCELLULAR LOCATION: Cytoplasm {ECO:0000305}.
FABY_ECOLI	P0ADQ2	Probable acyltransferase FabY (EC 2.3.1.-)	fabY	11	11	-0.120986	-0.086025	fatty acid biosynthetic process [GO:0006633]; UDP-N-acetylglucosamine biosynthetic process [GO:0006048]		acyltransferase activity, transferring groups other than amino-acyl groups [GO:0016747]; glucosamine 6-phosphate N-acetyltransferase activity [GO:0004343]; fatty acid biosynthetic process [GO:0006633]; UDP-N-acetylglucosamine biosynthetic process [GO:0006048]	acyltransferase activity, transferring groups other than amino-acyl groups [GO:0016747]; glucosamine 6-phosphate N-acetyltransferase activity [GO:0004343]
FABZ_ECOLI	P0A6Q6	3-hydroxyacyl-[acyl-carrier-protein] dehydratase FabZ (EC 4.2.1.59) ((3R)-hydroxymyristoyl-[acyl-carrier-protein] dehydratase) ((3R)-hydroxymyristoyl-ACP dehydrase) (17 kDa actomyosin component) (Beta-hydroxyacyl-ACP dehydratase)	fabZ	34	25	0.0269048	0.530705	fatty acid biosynthetic process [GO:0006633]; lipid A biosynthetic process [GO:0009245]	cytoplasm [GO:0005737]	cytoplasm [GO:0005737]; (3R)-hydroxymyristoyl-[acyl-carrier-protein] dehydratase activity [GO:0008659]; 3-hydroxydecanoyl-[acyl-carrier-protein] dehydratase activity [GO:0008693]; 3-hydroxyoctanoyl-[acyl-carrier-protein] dehydratase activity [GO:0047451]; 3-hydroxypalmitoyl-[acyl-carrier-protein] dehydratase activity [GO:0004317]; identical protein binding [GO:0042802]; fatty acid biosynthetic pr…	(3R)-hydroxymyristoyl-[acyl-carrier-protein] dehydratase activity [GO:0008659]; 3-hydroxydecanoyl-[acyl-carrier-protein] dehydratase activity [GO:0008693]; 3-hydroxyoctanoyl-[acyl-carrier-protein] dehydratase activity [GO:0047451]; 3-hydroxypalmitoyl-[acyl-carrier-protein] dehydratase activity [GO:0004317]; identical protein binding [GO:0042802]	SUBCELLULAR LOCATION: Cytoplasm.
FADA_ECOLI	P21151	3-ketoacyl-CoA thiolase FadA (EC 2.3.1.16) (Acetyl-CoA acyltransferase) (Beta-ketothiolase) (Fatty acid oxidation complex subunit beta)	fadA	14	21	0.021462	-0.767047	fatty acid beta-oxidation [GO:0006635]; phenylacetate catabolic process [GO:0010124]	cytoplasm [GO:0005737]	cytoplasm [GO:0005737]; acetyl-CoA C-acyltransferase activity [GO:0003988]; fatty acid beta-oxidation [GO:0006635]; phenylacetate catabolic process [GO:0010124]	acetyl-CoA C-acyltransferase activity [GO:0003988]	SUBCELLULAR LOCATION: Cytoplasm.
FADB_ECOLI	P21177	Fatty acid oxidation complex subunit alpha [Includes: Enoyl-CoA hydratase/Delta(3)-cis-Delta(2)-trans-enoyl-CoA isomerase/3-hydroxybutyryl-CoA epimerase (EC 4.2.1.17) (EC 5.1.2.3) (EC 5.3.3.8); 3-hydroxyacyl-CoA dehydrogenase (EC 1.1.1.35)]	fadB	42	54	0.0236986	-1.01245	fatty acid beta-oxidation [GO:0006635]	fatty acid beta-oxidation multienzyme complex [GO:0036125]	fatty acid beta-oxidation multienzyme complex [GO:0036125]; 3-hydroxyacyl-CoA dehydrogenase activity [GO:0003857]; 3-hydroxybutyryl-CoA epimerase activity [GO:0008692]; dodecenoyl-CoA delta-isomerase activity [GO:0004165]; enoyl-CoA hydratase activity [GO:0004300]; long-chain-3-hydroxyacyl-CoA dehydrogenase activity [GO:0016509]; NAD+ binding [GO:0070403]; fatty acid beta-oxidation [GO:0006635]	3-hydroxyacyl-CoA dehydrogenase activity [GO:0003857]; 3-hydroxybutyryl-CoA epimerase activity [GO:0008692]; dodecenoyl-CoA delta-isomerase activity [GO:0004165]; enoyl-CoA hydratase activity [GO:0004300]; long-chain-3-hydroxyacyl-CoA dehydrogenase activity [GO:0016509]; NAD+ binding [GO:0070403]
FADE_ECOLI	Q47146	Acyl-coenzyme A dehydrogenase (ACDH) (Acyl-CoA dehydrogenase) (EC 1.3.8.7) (EC 1.3.8.8)	fadE	15	29	-0.0264698	-1.31599	fatty acid beta-oxidation using acyl-CoA dehydrogenase [GO:0033539]	plasma membrane [GO:0005886]	plasma membrane [GO:0005886]; acyl-CoA dehydrogenase activity [GO:0003995]; flavin adenine dinucleotide binding [GO:0050660]; long-chain-acyl-CoA dehydrogenase activity [GO:0004466]; fatty acid beta-oxidation using acyl-CoA dehydrogenase [GO:0033539]	acyl-CoA dehydrogenase activity [GO:0003995]; flavin adenine dinucleotide binding [GO:0050660]; long-chain-acyl-CoA dehydrogenase activity [GO:0004466]
FADH_ECOLI	P42593	2,4-dienoyl-CoA reductase [(2E)-enoyl-CoA-producing] (DCR) (EC 1.3.1.34) (2,4-dienoyl-coenzyme A reductase [NADPH])	fadH	7	7	-0.0221582	-1.11107	fatty acid beta-oxidation, unsaturated, even number, reductase/isomerase pathway [GO:0033543]		2,4-dienoyl-CoA reductase (NADPH) activity [GO:0008670]; 4 iron, 4 sulfur cluster binding [GO:0051539]; FAD binding [GO:0071949]; FMN binding [GO:0010181]; metal ion binding [GO:0046872]; fatty acid beta-oxidation, unsaturated, even number, reductase/isomerase pathway [GO:0033543]	2,4-dienoyl-CoA reductase (NADPH) activity [GO:0008670]; 4 iron, 4 sulfur cluster binding [GO:0051539]; FAD binding [GO:0071949]; FMN binding [GO:0010181]; metal ion binding [GO:0046872]
FADI_ECOLI	P76503	3-ketoacyl-CoA thiolase FadI (EC 2.3.1.16) (ACSs) (Acetyl-CoA acyltransferase) (Acyl-CoA ligase) (Beta-ketothiolase) (Fatty acid oxidation complex subunit beta)	fadI	10	17	0.0465779	-0.689607	fatty acid beta-oxidation [GO:0006635]; fatty acid beta-oxidation, unsaturated, even number [GO:0033542]	cytoplasm [GO:0005737]; cytosol [GO:0005829]	cytoplasm [GO:0005737]; cytosol [GO:0005829]; 3-hydroxyacyl-CoA dehydrogenase activity [GO:0003857]; acetyl-CoA C-acetyltransferase activity [GO:0003985]; acetyl-CoA C-acyltransferase activity [GO:0003988]; enoyl-CoA hydratase activity [GO:0004300]; fatty acid beta-oxidation [GO:0006635]; fatty acid beta-oxidation, unsaturated, even number [GO:0033542]	3-hydroxyacyl-CoA dehydrogenase activity [GO:0003857]; acetyl-CoA C-acetyltransferase activity [GO:0003985]; acetyl-CoA C-acyltransferase activity [GO:0003988]; enoyl-CoA hydratase activity [GO:0004300]	SUBCELLULAR LOCATION: Cytoplasm {ECO:0000250}.
FADJ_ECOLI	P77399	Fatty acid oxidation complex subunit alpha [Includes: Enoyl-CoA hydratase/3-hydroxybutyryl-CoA epimerase (EC 4.2.1.17) (EC 5.1.2.3); 3-hydroxyacyl-CoA dehydrogenase (EC 1.1.1.35)]	fadJ	9	20	0.0942385	-0.400718	fatty acid beta-oxidation [GO:0006635]	cytoplasm [GO:0005737]	cytoplasm [GO:0005737]; 3-hydroxyacyl-CoA dehydrogenase activity [GO:0003857]; 3-hydroxybutyryl-CoA epimerase activity [GO:0008692]; enoyl-CoA hydratase activity [GO:0004300]; long-chain-3-hydroxyacyl-CoA dehydrogenase activity [GO:0016509]; NAD+ binding [GO:0070403]; fatty acid beta-oxidation [GO:0006635]	3-hydroxyacyl-CoA dehydrogenase activity [GO:0003857]; 3-hydroxybutyryl-CoA epimerase activity [GO:0008692]; enoyl-CoA hydratase activity [GO:0004300]; long-chain-3-hydroxyacyl-CoA dehydrogenase activity [GO:0016509]; NAD+ binding [GO:0070403]	SUBCELLULAR LOCATION: Cytoplasm {ECO:0000250}.
FADL_ECOLI	P10384	Long-chain fatty acid transport protein (Outer membrane FadL protein) (Outer membrane flp protein)	fadL	101	91	0.0746401	1.56367		cell outer membrane [GO:0009279]; integral component of membrane [GO:0016021]	cell outer membrane [GO:0009279]; integral component of membrane [GO:0016021]; ligand-gated channel activity [GO:0022834]; long-chain fatty acid transporting porin activity [GO:0015483]	ligand-gated channel activity [GO:0022834]; long-chain fatty acid transporting porin activity [GO:0015483]	SUBCELLULAR LOCATION: Cell outer membrane {ECO:0000269|PubMed:16079137}; Multi-pass membrane protein {ECO:0000269|PubMed:16079137}.
FADM_ECOLI	P77712	Long-chain acyl-CoA thioesterase FadM (EC 3.1.2.-) (Acyl-CoA thioester hydrolase) (Thioesterase 3) (Thioesterase III)	fadM	1	2	-0.0919047	-0.858019	fatty acid beta-oxidation [GO:0006635]		acyl-CoA hydrolase activity [GO:0047617]; myristoyl-CoA hydrolase activity [GO:0102991]; palmitoyl-CoA hydrolase activity [GO:0016290]; fatty acid beta-oxidation [GO:0006635]	acyl-CoA hydrolase activity [GO:0047617]; myristoyl-CoA hydrolase activity [GO:0102991]; palmitoyl-CoA hydrolase activity [GO:0016290]
FADR_ECOLI	P0A8V6	Fatty acid metabolism regulator protein	fadR	13	7	0.031242	-0.459948	fatty acid oxidation [GO:0019395]; negative regulation of transcription, DNA-templated [GO:0045892]; positive regulation of fatty acid biosynthetic process [GO:0045723]; positive regulation of transcription, DNA-templated [GO:0045893]; regulation of fatty acid metabolic process [GO:0019217]	cytosol [GO:0005829]	cytosol [GO:0005829]; DNA binding [GO:0003677]; DNA-binding transcription factor activity [GO:0003700]; fatty-acyl-CoA binding [GO:0000062]; fatty acid oxidation [GO:0019395]; negative regulation of transcription, DNA-templated [GO:0045892]; positive regulation of fatty acid biosynthetic process [GO:0045723]; positive regulation of transcription, DNA-templated [GO:0045893]; regulation of fatty ac…	DNA binding [GO:0003677]; DNA-binding transcription factor activity [GO:0003700]; fatty-acyl-CoA binding [GO:0000062]	SUBCELLULAR LOCATION: Cytoplasm {ECO:0000255|HAMAP-Rule:MF_00696}.
FDHD_ECOLI	P32177	Sulfur carrier protein FdhD (Sulfurtransferase FdhD)	fdhD	5	4	-0.0923706	-0.437214	Mo-molybdopterin cofactor biosynthetic process [GO:0006777]; positive regulation of catalytic activity [GO:0043085]	cytosol [GO:0005829]	cytosol [GO:0005829]; molybdopterin cofactor binding [GO:0043546]; sulfur carrier activity [GO:0097163]; sulfurtransferase activity [GO:0016783]; Mo-molybdopterin cofactor biosynthetic process [GO:0006777]; positive regulation of catalytic activity [GO:0043085]	molybdopterin cofactor binding [GO:0043546]; sulfur carrier activity [GO:0097163]; sulfurtransferase activity [GO:0016783]	SUBCELLULAR LOCATION: Cytoplasm {ECO:0000255|HAMAP-Rule:MF_00187, ECO:0000269|PubMed:2170340}.
FDHE_ECOLI	P13024	Protein FdhE	fdhE	42	40	-0.0157307	-0.352372	protein maturation [GO:0051604]	cytoplasm [GO:0005737]; cytosol [GO:0005829]	cytoplasm [GO:0005737]; cytosol [GO:0005829]; ferric iron binding [GO:0008199]; protein maturation [GO:0051604]	ferric iron binding [GO:0008199]	SUBCELLULAR LOCATION: Cytoplasm.
FDOG_ECOLI	P32176	Formate dehydrogenase-O major subunit (EC 1.17.1.9) (Aerobic formate dehydrogenase major subunit) (FDH-Z subunit alpha) (Formate dehydrogenase-O subunit alpha)	fdoG	126	129	0.112214	-0.399617	anaerobic respiration [GO:0009061]; cellular respiration [GO:0045333]; cellular response to DNA damage stimulus [GO:0006974]; formate oxidation [GO:0015944]	cytosol [GO:0005829]; formate dehydrogenase complex [GO:0009326]; membrane [GO:0016020]; periplasmic space [GO:0042597]	cytosol [GO:0005829]; formate dehydrogenase complex [GO:0009326]; membrane [GO:0016020]; periplasmic space [GO:0042597]; 4 iron, 4 sulfur cluster binding [GO:0051539]; electron transfer activity [GO:0009055]; formate dehydrogenase (cytochrome-c-553) activity [GO:0047111]; formate dehydrogenase (NAD+) activity [GO:0008863]; formate dehydrogenase (quinone) activity [GO:0036397]; molybdenum ion bind…	4 iron, 4 sulfur cluster binding [GO:0051539]; electron transfer activity [GO:0009055]; formate dehydrogenase (cytochrome-c-553) activity [GO:0047111]; formate dehydrogenase (NAD+) activity [GO:0008863]; formate dehydrogenase (quinone) activity [GO:0036397]; molybdenum ion binding [GO:0030151]; molybdopterin cofactor binding [GO:0043546]	SUBCELLULAR LOCATION: Periplasm {ECO:0000305}.
FDOH_ECOLI	P0AAJ5	Formate dehydrogenase-O iron-sulfur subunit (Aerobic formate dehydrogenase iron-sulfur subunit) (FDH-Z subunit beta) (Formate dehydrogenase-O subunit beta)	fdoH	35	26	0.00129031	-0.54206	cellular respiration [GO:0045333]; formate oxidation [GO:0015944]	formate dehydrogenase complex [GO:0009326]; integral component of membrane [GO:0016021]; intrinsic component of the cytoplasmic side of the plasma membrane [GO:0031235]; membrane [GO:0016020]	formate dehydrogenase complex [GO:0009326]; integral component of membrane [GO:0016021]; intrinsic component of the cytoplasmic side of the plasma membrane [GO:0031235]; membrane [GO:0016020]; 4 iron, 4 sulfur cluster binding [GO:0051539]; formate dehydrogenase (quinone) activity [GO:0036397]; metal ion binding [GO:0046872]; cellular respiration [GO:0045333]; formate oxidation [GO:0015944]	4 iron, 4 sulfur cluster binding [GO:0051539]; formate dehydrogenase (quinone) activity [GO:0036397]; metal ion binding [GO:0046872]	SUBCELLULAR LOCATION: Cell membrane; Single-pass membrane protein.
FECA_ECOLI	P13036	Fe(3+) dicitrate transport protein FecA (Iron(III) dicitrate transport protein FecA)	fecA	1	3	-0.157601	-0.113639	iron ion homeostasis [GO:0055072]; iron ion transport [GO:0006826]	cell outer membrane [GO:0009279]; integral component of membrane [GO:0016021]	cell outer membrane [GO:0009279]; integral component of membrane [GO:0016021]; ferric iron transmembrane transporter activity [GO:0015091]; siderophore uptake transmembrane transporter activity [GO:0015344]; signaling receptor activity [GO:0038023]; iron ion homeostasis [GO:0055072]; iron ion transport [GO:0006826]	ferric iron transmembrane transporter activity [GO:0015091]; siderophore uptake transmembrane transporter activity [GO:0015344]; signaling receptor activity [GO:0038023]	SUBCELLULAR LOCATION: Cell outer membrane.
FECB_ECOLI	P15028	Fe(3+) dicitrate-binding periplasmic protein (Iron(III) dicitrate-binding periplasmic protein)	fecB	3	5	-0.00431478	0.0652604	iron ion homeostasis [GO:0055072]; response to iron ion [GO:0010039]; siderophore-dependent iron import into cell [GO:0033214]	outer membrane-bounded periplasmic space [GO:0030288]	outer membrane-bounded periplasmic space [GO:0030288]; iron ion homeostasis [GO:0055072]; response to iron ion [GO:0010039]; siderophore-dependent iron import into cell [GO:0033214]		SUBCELLULAR LOCATION: Periplasm.
FECE_ECOLI	P15031	Fe(3+) dicitrate transport ATP-binding protein FecE (Iron(III) dicitrate transport ATP-binding protein FecE)	fecE	1	2	-0.132891	0.172054	ion transport [GO:0006811]; iron ion homeostasis [GO:0055072]	plasma membrane [GO:0005886]	plasma membrane [GO:0005886]; ATP binding [GO:0005524]; ATPase-coupled transmembrane transporter activity [GO:0042626]; ion transport [GO:0006811]; iron ion homeostasis [GO:0055072]	ATPase-coupled transmembrane transporter activity [GO:0042626]; ATP binding [GO:0005524]	SUBCELLULAR LOCATION: Cell inner membrane; Peripheral membrane protein.
FECR_ECOLI	P23485	Protein FecR	fecR	2	2	0.0582717	-0.495102	ion transport [GO:0006811]; iron ion homeostasis [GO:0055072]; response to stimulus [GO:0050896]	periplasmic space [GO:0042597]	periplasmic space [GO:0042597]; sigma factor antagonist activity [GO:0016989]; ion transport [GO:0006811]; iron ion homeostasis [GO:0055072]; response to stimulus [GO:0050896]	sigma factor antagonist activity [GO:0016989]	SUBCELLULAR LOCATION: Periplasm.
FENR_ECOLI	P28861	Flavodoxin/ferredoxin--NADP reductase (EC 1.18.1.2) (EC 1.19.1.1) (Ferredoxin (flavodoxin):NADP(+) oxidoreductase) (Ferredoxin--NADP reductase) (FNR) (Flavodoxin--NADP reductase) (FLDR) (Methyl viologen resistance protein A) (dA1)	fpr	14	15	-0.0448702	-0.235799	iron-sulfur cluster assembly [GO:0016226]; response to drug [GO:0042493]; response to superoxide [GO:0000303]	cytosol [GO:0005829]	cytosol [GO:0005829]; FAD binding [GO:0071949]; ferredoxin-NADP+ reductase activity [GO:0004324]; iron-sulfur cluster assembly [GO:0016226]; response to drug [GO:0042493]; response to superoxide [GO:0000303]	FAD binding [GO:0071949]; ferredoxin-NADP+ reductase activity [GO:0004324]	SUBCELLULAR LOCATION: Cytoplasm {ECO:0000269|PubMed:7961651}.
FEOA_ECOLI	P0AEL3	Fe(2+) transport protein A (Ferrous iron transport protein A)	feoA	2	2	-0.0373963	-1.48715	cellular response to DNA damage stimulus [GO:0006974]; ion transport [GO:0006811]; iron ion homeostasis [GO:0055072]	cytoplasm [GO:0005737]	cytoplasm [GO:0005737]; transition metal ion binding [GO:0046914]; cellular response to DNA damage stimulus [GO:0006974]; ion transport [GO:0006811]; iron ion homeostasis [GO:0055072]	transition metal ion binding [GO:0046914]	SUBCELLULAR LOCATION: Cytoplasm {ECO:0000305|PubMed:23104801}.
FEOB_ECOLI	P33650	Fe(2+) transporter FeoB (Ferrous iron transport protein B)	feoB	8	6	-0.108235	-0.882104	cellular response to DNA damage stimulus [GO:0006974]; iron ion homeostasis [GO:0055072]; iron ion import across plasma membrane [GO:0098711]	integral component of plasma membrane [GO:0005887]; plasma membrane [GO:0005886]	integral component of plasma membrane [GO:0005887]; plasma membrane [GO:0005886]; ferrous iron transmembrane transporter activity [GO:0015093]; GTP binding [GO:0005525]; identical protein binding [GO:0042802]; cellular response to DNA damage stimulus [GO:0006974]; iron ion homeostasis [GO:0055072]; iron ion import across plasma membrane [GO:0098711]	ferrous iron transmembrane transporter activity [GO:0015093]; GTP binding [GO:0005525]; identical protein binding [GO:0042802]	SUBCELLULAR LOCATION: Cell inner membrane {ECO:0000269|PubMed:15919996}; Multi-pass membrane protein.
[truncated: 1,850 more rows]

## Sheet: Exp #1
Entry name	Uniprot	Protein names	Gene name (primary )	UniqID_Exp1	Protien Slope (multi-N)	Protien Slope (1-N)	Normalized_proportion_1_exp1	Normalized_proportion_2_exp1	Normalized_proportion_3_exp1	Normalized_proportion_4_exp1	Normalized_proportion_5_exp1	Normalized_proportion_6_exp1	Normalized_proportion_7_exp1	Normalized_proportion_8_exp1
[truncated: 2,360 more rows]

[truncated: 3 more sheets: Exp #2, GO analysis, Misc]
